# Supplementary material for: The Functional Characterization of DzCYP72A12-4 Related to Diosgenin Biosynthesis and Drought Adaptability in Dioscorea zingiberensis
Source: MDPI journal article supplement (doi:10.3390/ijms24098430), 2023-05-08
Supplement: s1 [file s1]

**Table S5. List of primers used in the present study**

| Primer names    | sequence 5'-3'                         | Purpose                |
|-----------------|----------------------------------------|------------------------|
| DzCYP90B71-F    | ATGGCGCCGATGGAGCTTCTTCT                | Gene clone             |
| DzCYP90B71-R    | TCAGGCTGAAGCTTTGTGATCAA                |                        |
| DzCYP90G6-F     | ATGTTTCCTCTAGCTATCATCGT                |                        |
| DzCYP90G6-R     | TCATTCTAGGATGGATAGCTTGC                |                        |
| DzCYP94N8-F     | ATGGAGTTCACTTGGCTTCTCCT                |                        |
| DzCYP94N8-R     | TCAAACAGCTTTGGTACATGGAT                |                        |
| DzCYP72A12-4-F  | ATTTGTTTTGACAGATGGAGTC                 |                        |
| DzCYP72A12-4-R  | TCACAGCTTTTGACAGCATGAGTT               | vector<br>construction |
| DzCYP90B71-F1   | ACTTCTGCAGACCGCCATGGCGCCGATGGA         |                        |
| DzCYP90B71-R1   | TCACCAATTCAGGCTGAAGCTTTG               |                        |
| DzCYP90G6-F1    | TCTCGAGTCTACCATGTTTCCTCTAGCTATCAT      |                        |
| DzCYP90G6-R1    | AGCTGGTCACCAATTCATTCTAGGATGGATAGCT     |                        |
| DzCYP94N8-F1    | ACAAATCTATCTCTGCCACCATGTGTCTTGCAATGG   |                        |
| DzCYP94N8-R1    | GAGCTGGTCACCAATTCAAACAGCTTTGGTACAT     |                        |
| DzCYP72A12-4-F1 | CAAATCTATCTCTGCCACCATGGAGTCAGTGAT      |                        |
| DzCYP72A12-4-R1 | GAGCTGGTCACCAATTCACAGCTTTTGACAGC       |                        |
| CAMV35S-F1      | AATGGTACCCGACACTCTCGTCTACTCCA          |                        |
| CAMV35S-R1      | GGTAGACTCGAGAGAGATAGATTTGTAG           |                        |
| UBI1-F1         | ACCATTAATTAACCCTGCAGGCTGCAGTGCAGCGTGAC |                        |
| UBI1-R1         | GGCGGTCTGCAGAAGTAACACCAAACAAC          |                        |
| NOS-F1          | GGTGACCAGCTCGAATTTCCCCGAT              |                        |
| NOS-R1          | CCGATCTAGTAACATAGATGACACCGCGCGC        |                        |
| CAMV 35s-Pf     | GAAGTTCATTTCAATTTGGAGAGGAC             | positive screen        |
| UBI1-F1         | TTGCTTGGTACTGTTTCTTTTGTGCGAT           |                        |
| DzCYP90B71-PR   | GCATGCACTTTGATTGGCAAGT                 |                        |
| DzCYP72A12-4-PR | GCATGAGTTGAGCTCCATGCTG                 |                        |
| DzCYP94N8-PR    | GTCACAGAGAGCTGAGGCTCGC                 |                        |
| DzCYP90G6-PR    | GCTTGCGAACTTTGATAGGAAGGCCCT            | RT-PCR                 |
| DzGAPDH-qF      | TTTGGTGAAAAGTCAGTCGCA                  |                        |
| DzGAPDH-qR      | TCGGAGCAGAAATGACAACCT                  |                        |
| DzCYP90B71-qF   | GCCGATGGAGCTTCTTCTCAT                  |                        |
| DzCYP90B71-qR   | GCCTATCAGAGGCCAGCCCAT                  |                        |
| DzCYP90G6-qF    | ATCATCGTCTTGCTATTTCCCA                 |                        |
| DzCYP90G6-qR    | CGGCTCGAACAGCTTCCCGTC                  |                        |
| DzCYP94N8-qF    | TCCTCCTCCATCTAAACCCAACT                |                        |
| DzCYP94N8-qR    | GACGAGCTCGGTGACGAAGAAG                 |                        |
| DzCYP72A12-4-qF | AAGGAGGCTAAATCCCGGCCTCT                |                        |
| DzCYP72A12-4-qR | GGTTGATGATCCTTCTGTGTTTGCCC             |                        |
