# Supplementary material for: The Functional Characterization of DzCYP72A12-4 Related to Diosgenin Biosynthesis and Drought Adaptability in Dioscorea zingiberensis
Source: MDPI journal article supplement (doi:10.3390/ijms24098430), 2023-05-08
Supplement: s1 [file s1]

**Table S3. Alignment of DzCYP72A nucleic acid sequences. Extreme similarity occurred in coding sequence of DzCYP72As belonging to Clade I (DzCYP1-13/23/24) and Clade II (DzCYP72A18-20), respectively. The first column in each paragraph contains gene or protein symbol, and the numbers in parentheses are sequence start location information. Completely consistent sequences are identified in yellow, and partially consistent sequences are identified in blue.**

|            |       |     |                                                    |                                |
|------------|-------|-----|----------------------------------------------------|--------------------------------|
|            |       | 551 |                                                    | 600                            |
| DzCYP18    | (551) | AAG | ATGCTGGAGATGCAGCTGA                                | AAGACAGGGGTTGCCAGG-AACAAGTA    |
| DzCYP72A17 | (1)   | --- | ATGCTGGAGATGCAGCTGA                                | AAGACAGGGGTTGCCCGGGAACAAGTA    |
| DzCYP72A22 | (1)   | --- | ATGCTGGAGATGCAGCTGA                                | AAGACAGGGGTTGCCCGGGAACAAGTA    |
| DzCYP72A20 | (47)  | A-G | ATGCTGGAGATGCAGCTGA                                | AAAGGCAGGGGTTGCCCGGGAACAAGTA   |
| DzCYP72A21 | (1)   | --- | ATGCTGGAGATGCAGCTGA                                | AAGACAGGGGTTGCCCGGGAACAAGTA    |
|            |       | 601 |                                                    | 650                            |
| DzCYP18    | (600) |     | TCGGCTGATGATGGGGGACATGAAGGATGAGAAAAAGTCCTTCAAGGAGG |                                |
| DzCYP72A17 | (48)  |     | TCGGCTGATGATGGGGGACATGAAGGATGAGAAAAAGTCCTTCAAGGAGG |                                |
| DzCYP72A22 | (48)  |     | TCGGCTGATGATGGGGGACATGAAGGATGAGAAAAAGTCCTTCAAGGAGG |                                |
| DzCYP72A20 | (96)  |     | TCGGCTGATGATGGGGGACATGAAGGATGAGAAAAAGTCCTTCAAGGAGG |                                |
| DzCYP72A21 | (48)  |     | TCGGCTGATGATGGGGGACATGAAGGATGAGAAAAAGTCCTTCAAGGAGG |                                |
|            |       | 651 |                                                    | 700                            |
| DzCYP18    | (650) |     | CTTGGTCCAGGCCAATGGAGCTCACGCACAGGATAGCGGCTCGTGTGATT |                                |
| DzCYP72A17 | (98)  |     | CTTGGTCCAGGCCAATGGAGCTCACGCACAGGATAGCGGCTCGTGTGATT |                                |
| DzCYP72A22 | (98)  |     | CTTGGTCCAGGCCAATGGAGCTCACGCACAGGATAGCGGCTCGTGTGATT |                                |
| DzCYP72A20 | (146) |     | CTTGGTCCAGGCCAATGGAGCTCACGCACAGGATAGCGGCTCGTGTGATT |                                |
| DzCYP72A21 | (98)  |     | CTTGGTCCAGGCCAATGGAGCTCACGCACAGGATAGCGGCTCGTGTGATT |                                |
|            |       | 701 |                                                    | 750                            |
| DzCYP18    | (700) |     | CCCTATGATCATCAAAT---                               | GGCTCAAACACATGGCAAGATATCATTCAA |
| DzCYP72A17 | (148) |     | CCCTATGATCATCAAAT---                               | GGCTCAAACACATGGCAAGATATCATTCAA |
| DzCYP72A22 | (148) |     | CCCTATGATCATCAAAT---                               | GGCTCAAACACATGGCAAGATATCATTCAA |
| DzCYP72A20 | (196) |     | CCCTATGATCATCAAATAAT                               | GGCTCAAACACATGGCAAGATATCATTCAA |
| DzCYP72A21 | (148) |     | CCCTATGATCATCAAAT---                               | GGCTCAAACACATGGCAAGATATCATTCAA |
|            |       | 751 |                                                    | 800                            |
| DzCYP18    | (747) |     | ATGGAATGGAACAACCTCCAGAGTGAACATATGGAATCCAGAGATGT    | CGA                            |
| DzCYP72A17 | (195) |     | ATGGAATGGAACAACCTCCAGAGTGAACATCTGGAATCCAGAGATGT    | CGA                            |
| DzCYP72A22 | (195) |     | ATGGAATGGAACAACCTCCAGAGTGAACATCTGGAATCCAGAGATGT    | CGA                            |
| DzCYP72A20 | (246) |     | ATGGAATGGGACAACCTCCAGAGTGAACATATGGAATCCAGAGATGT    | TGA                            |
| DzCYP72A21 | (195) |     | ATGGAATGGAACAACCTCCAGAGTGAACATCTGGAATCCAGAGATGT    | CGA                            |
|            |       | 801 |                                                    | 850                            |
| DzCYP18    | (797) |     | GAGAGATCCTGTTAACAAGTCTGGCCACATTATCAAGCCACAAC       | CTTAAC                         |
| DzCYP72A17 | (245) |     | GAGAGATCCTGTTGAACAAGTCTGGCCACATTATCAAGCCACAAC      | CTTAAC                         |
| DzCYP72A22 | (245) |     | GAGAGATCCTGTTGAACAAGTCTGGCCACATTATCAAGCCACAAC      | CTTAAC                         |
| DzCYP72A20 | (296) |     | AAGAGATCCTGTTGAACAAGTCTGGCCACATTATCAAGCCACAAG      | TGAAC                          |
| DzCYP72A21 | (245) |     | GAGAGATCCTGTTGAACAAGTCTGGCCACATTATCAAGCCACAAC      | CTTAAC                         |
|            |       | 851 |                                                    | 900                            |
| DzCYP18    | (847) |     | CCTCTGATAAGGCTGCTTACAATGGGAGTATCTACACTTGAAGGAGAAGA |                                |
| DzCYP72A17 | (295) |     | CCTCTGATAAGGCTGCTTACAATGGGAGTATCTACACTTGAAGGAGAAGA |                                |
| DzCYP72A22 | (295) |     | CCTCTGATAAGGCTGCTTACAATGGGAGTATCTACACTTGAAGGAGAAGA |                                |
| DzCYP72A20 | (346) |     | CCTCTGATAAGGCTGCTTACAATGGGAGTATCTACACTTGAAGGAGAAGA |                                |
| DzCYP72A21 | (295) |     | CCTCTGATAAGGCTGCTTACAATGGGAGTATCTACACTTGAAGGAGAAGA |                                |
|            |       | 901 |                                                    | 950                            |
| DzCYP18    | (897) |     | ATGGGCACAGAGGAGGAAGTTGATCAATCCTGCCTTTCATATGGAGAAAC |                                |
| DzCYP72A17 | (345) |     | ATGGGCACAGAGGAGGAAGTTGATCAATCCTGCCTTTCATATGGAGAAAC |                                |
| DzCYP72A22 | (345) |     | ATGGGCACAGAGGAGGAAGTTGATCAATCCTGCCTTTCATATGGAGAAAC |                                |
| DzCYP72A20 | (396) |     | ATGGGCACAGAGGAGGAAGTTGATCAATCCTGCCTTTCATATGGAGAAAC |                                |
| DzCYP72A21 | (345) |     | ATGGGCACAGAGGAGGAAGTTGATCAATCCTGCCTTTCATATGGAGAAAC |                                |
|            |       | 951 |                                                    | 1000                           |
| DzCYP18    | (947) |     | TCAAGGAGATGGTACCTGCTTTTCGAATCAGTTGCATTGATT         | TAGTCAAG                       |

|            |        |                                                        |
|------------|--------|--------------------------------------------------------|
| DzCYP72A17 | (395)  | TCAAGGAGATGGTACCTGCTTTTCGAATCAGTTGCATTGATTTAGTCAAG     |
| DzCYP72A22 | (395)  | TCAAGGAGATGGTACCTGCTTTTCGAATCAGTTGCATTGATTTAGTCAAG     |
| DzCYP72A20 | (446)  | TCAAGGAGATGGTACCTGCTTTTCGAATCAGTTGCATTGATTTAGTCAAG     |
| DzCYP72A21 | (395)  | TCAAGGAGATGGTACCTGCTTTTCGAATCAGTTGCATTGATTTAGTCAAG     |
|            |        | 1001 1050                                              |
| DzCYP18    | (997)  | AGGTGGGAGAACTT---AGTGAGTGCCGAAGGATCCTGTGAACTAGATGT     |
| DzCYP72A17 | (445)  | AGGTGGGAGAACTT---AGTGAGTGCCGAAGGATCCTGTGAACTAGATGT     |
| DzCYP72A22 | (445)  | AGGTGGGAGAACTT---AGTGAGTGCCGAAGGATCCTGTGAACTAGATGT     |
| DzCYP72A20 | (496)  | AGGTGGGAGAACTT---AGTGAGTGCCGAAGGATCCTGTGAACTAGATGT     |
| DzCYP72A21 | (445)  | AGGTGGGAGAACTTGGTAGTGAGTGCCGAAGGATCCTGTGAACTAGATGT     |
|            |        | 1051 1100                                              |
| DzCYP18    | (1044) | CTGGCCTGAATTTTCAGAGTCTAACAGGAGATGTGATCTCTCGCACTGCAT    |
| DzCYP72A17 | (492)  | CTGGCCTGAATTTTCAGAGTCTAACAGGAGATGTGATCTCTCGCACTGCAT    |
| DzCYP72A22 | (492)  | CTGGCCTGAATTTTCAGAGTCTAACAGGAGATGTGATCTCTCGCACTGCAT    |
| DzCYP72A20 | (543)  | CTGGCCTGAATTTTCAGAGTCTAACAGGAGATGTGATCTCTCGCACTGCAT    |
| DzCYP72A21 | (495)  | CTGGCCTGAATTTTCAGAGTCTAACAGGAGATGTGATCTCTCGCACTGCAT    |
|            |        | 1101 1150                                              |
| DzCYP18    | (1094) | TTGGTAGTAGTTTTGAGGAAGGAAAGCAGATTTTTGAGTCCAAAAGGAA      |
| DzCYP72A17 | (542)  | TTGGTAGTAGTTTTGAGGAAGGAAAGCAGATTTTTGAACTCCAAAAGGAA     |
| DzCYP72A22 | (542)  | TTGGTAGTAGTTTTGAGGAAGGAAAGCAGATTTTTGAACTCCAAAAGGAA     |
| DzCYP72A20 | (593)  | TTGGTAGTAGTTTTGAGGAAGGAAAGCAGATTTTTGAACTCCAAAAGGAA     |
| DzCYP72A21 | (545)  | TTGGTAGTAGTTTTGAGGAAGGAAAGCAGATTTTTGAACTCCAAAAGGAA     |
|            |        | 1151 1200                                              |
| DzCYP18    | (1144) | CAAGCTGTTCTTGTCATTGAAGCTGCCCCTCGATCTATCTTCCAGGCTT      |
| DzCYP72A17 | (592)  | CAAGCTGTTCTTGTCATTGAAGCTTCCCCTCGATCTATCTTCCAGGCTT      |
| DzCYP72A22 | (592)  | CAAGCTGTTCTTGTCATTGAAGCTTCCCCTCGATCTATCTTCCAGGCTT      |
| DzCYP72A20 | (643)  | CAAGCTGTTCTTGTCATTGAAGCTGCCCCTCGATCTATCTTCCAGGCTT      |
| DzCYP72A21 | (595)  | CAAGCTGTTCTTGTCATTGAAGCTGCCCCTCGATCTATCTTCCAGGCTT      |
|            |        | 1201 1250                                              |
| DzCYP18    | (1194) | TAGGTTTCCTGCCAACTGCAAAGAATAAGAGGAGAATGTTTCATCGACAGTG   |
| DzCYP72A17 | (642)  | TAGGTTTCCTGCCAACTGCAAAGAATAAGAGGAGAATGTTTCATCGACAGTG   |
| DzCYP72A22 | (642)  | TAGATTCCTGCCAACTGCAAAGAATAAGAGGAGAATGTTTCATCGACAGTG    |
| DzCYP72A20 | (693)  | TAGGTTTCCTGCCAACTGCAAAGAATAAGAGGAGAATGTTTCATCGACAGTG   |
| DzCYP72A21 | (645)  | TAGGTTTCCTGCCAACTGCAAAGAATAAGAGGAGAATGTTTCATCGACAGTG   |
|            |        | 1251 1300                                              |
| DzCYP18    | (1244) | AGATCAAGAGAATGCTACGAGATATCATCCACAAGAAGATAGATTCAATG     |
| DzCYP72A17 | (692)  | AGATCAAGAGAATGCTACGAGATATCATCCACAAGAAGTATAGATTCAATG    |
| DzCYP72A22 | (692)  | AGATCAAGAGAATGCTACGAGATATCATCCACAAGAAGTATAGATTCAATG    |
| DzCYP72A20 | (743)  | AGATCAAGAGAATGCTACGAGATATCATCCACAAGAAGATAGATTCAATG     |
| DzCYP72A21 | (695)  | AGATCAAGAGAATGCTACGAGATATCATCCACAAGAAGATAGATTCAATG     |
|            |        | 1301 1350                                              |
| DzCYP18    | (1294) | AAAATCGGAGAAAACTGATGATGACTTACTCAGCTTGTTTATTTGCAA       |
| DzCYP72A17 | (742)  | AAAATCGGAGAAAACTGATGATGACTTACTCAGCTTGTT---GTTGCAA      |
| DzCYP72A22 | (742)  | AAAATCGGAGAAAACTGATGATGACTTACTCAGCTTGTT---GTTGCAA      |
| DzCYP72A20 | (793)  | AAAATCGGAGAAAACTGATGATGACTTACTCAGCTTGTT---GTTGCAA      |
| DzCYP72A21 | (745)  | AAAATCGGAGAAAACTGATGATGACTTACTCAGCTTGTT---GTTGCAA      |
|            |        | 1351 1400                                              |
| DzCYP18    | (1344) | TCCGATACATATGA-----                                    |
| DzCYP72A17 | (790)  | TCCGATACGATGAATGTTGTCGCTGAAGATAAAAAACAAGAAAGAACAAATGG  |
| DzCYP72A22 | (790)  | TCCAAATACGATGAATGTTGCCGCTGAAGATAAAAAACAAGAAAGAACAAATGG |
| DzCYP72A20 | (841)  | TCCGATACGATGAATGTTGCCACTGAAGATAAAAAACAAGAAAGAACAAATGG  |
| DzCYP72A21 | (793)  | TCCGATACATGAATGTTGCCACTGAAGATAAAAAACAAGAAAGAACAAATGG   |
|            |        | 1401 1450                                              |
| DzCYP18    | (1357) | -----                                                  |
| DzCYP72A17 | (840)  | GATCACGATTGATGATGTAATAGAGGAATGCAAGTTGTTCTACTTCGCTG     |
| DzCYP72A22 | (840)  | GATCACGATTGATGATGTAATAGAGGAATGCAAGTTGTTCTACTTCGCTG     |
| DzCYP72A20 | (891)  | GATCACGATTGATGATGTAATAGAGGAATGCAAGTTGTTCTACTTCGCTG     |

|            |        |                                                     |
|------------|--------|-----------------------------------------------------|
| DzCYP72A21 | (843)  | GATCACGATTGATGATGTAATAGAGGAATGCAAGTTGTTCTACTTTGCTG  |
|            | 1451   | 1500                                                |
| DzCYP18    | (1357) | -----                                               |
| DzCYP72A17 | (890)  | GCCAAGAGGGCACCTCAATTTTGCTTACCTGGACATTGATTCTCTTATCC  |
| DzCYP72A22 | (890)  | GCCAAGAGGGCACCTCAATTTTGCTTACCTGGACATTGATTCTCTTATCC  |
| DzCYP72A20 | (941)  | GCCAAGAGACCACCTCAATTTTGCTTACCTGGACATTGATTCTCTTATCC  |
| DzCYP72A21 | (893)  | GCCAAGAGACCACCTCAATTTTGCTTACCTGGACATTGATTCTCTTATCC  |
|            | 1501   | 1550                                                |
| DzCYP18    | (1357) | -----                                               |
| DzCYP72A17 | (940)  | ATGTACCCTAGTTGGCAGAAGAAAGCAAGGGAGGAAGTTCTCAATAACTG  |
| DzCYP72A22 | (940)  | ATGTACCCTAGTTGGCAGAAGAAAGCAAGGGAGGAAGTTCTCAATAACTG  |
| DzCYP72A20 | (991)  | ATGTACCCTACTTGGCAGAAGAAAGCTAGGGAGGAAGTTCTCAATACCTG  |
| DzCYP72A21 | (943)  | ATGTACCCTACTTGGCAGAAGAAAGCTAGGGAGGAAGTTCTCAATACCTT  |
|            | 1551   | 1600                                                |
| DzCYP18    | (1357) | -----                                               |
| DzCYP72A17 | (990)  | CGGGAAGAACACACCTGAGTTCGAGAACATCAGCCACCTCAAGATTGTAA  |
| DzCYP72A22 | (990)  | CAGGAAGAACACACCTGAGTTCGAGAACATCAGCCACCTCAAAATTGTAA  |
| DzCYP72A20 | (1041) | TGGGAAAACACACCTGAGTTCGAGAACATCAGCCACCTCAAGATTGTAA   |
| DzCYP72A21 | (993)  | TGGGAAGAACACACCTGAGTTCGAGAACATCAGCCACCTCAAGATTGTAA  |
|            | 1601   | 1650                                                |
| DzCYP18    | (1357) | -----                                               |
| DzCYP72A17 | (1040) | ACATGATATTACATGAAGTATTGAGGTTGTATCCACCTGGGTCACACTG   |
| DzCYP72A22 | (1040) | ACATGATATTACATGAAGTATTGAGGTTGTATCCACCTGGGTCACACTG   |
| DzCYP72A20 | (1091) | ACATGATATTACATGAAGTATTGAGGTTGTATCCACCTGTGATCACACTG  |
| DzCYP72A21 | (1043) | ACATGATATTACATGAAGTATTGAGGTTGTATCCACCTGTGATCACACTG  |
|            | 1651   | 1700                                                |
| DzCYP18    | (1357) | -----                                               |
| DzCYP72A17 | (1090) | ATTTCGTTACATAAACAAGAAAGTCAAAGTGGGAATATAACATTACCTGC  |
| DzCYP72A22 | (1090) | ATTTCGTTACATAAACAAGAAAGTCAAAGTGGGAATATAACATTACCTGC  |
| DzCYP72A20 | (1141) | TTTCGTCACATAAACAAGAAAGTCAAAGTGGGAGATATAACATTACCTGC  |
| DzCYP72A21 | (1093) | TTCGTCACATAAACAAGAAAGTCAAAGTGGGAGATATAACATTACCTGC   |
|            | 1701   | 1750                                                |
| DzCYP18    | (1357) | -----                                               |
| DzCYP72A17 | (1140) | TGGAGCTGAAGTCTTGATACCTATTCTACAAGTACACCATGATCCAGAAA  |
| DzCYP72A22 | (1140) | TGGAGCTGAAGTCTTGATACCTATTCTACAAGTACACCATGATCCAGAAA  |
| DzCYP72A20 | (1191) | TGGAGCTGAAGTCTTGATACCTATTCTACAAGTACACCATGATCCAGAAA  |
| DzCYP72A21 | (1143) | TGGAGCTGAAGTCTTGATACCTATTCTACAAGTACACCATGATCCAGAAA  |
|            | 1751   | 1800                                                |
| DzCYP18    | (1357) | -----                                               |
| DzCYP72A17 | (1190) | TTTGGGGAGAGATGCTGAAGAGTTCAAACCAGAGAGATTTTCAGAAGGG   |
| DzCYP72A22 | (1190) | TTTGGGGAGAGATGCTGAAGAGTTCAAACCAGAGAGATTTTCAGAAGGG   |
| DzCYP72A20 | (1241) | TTTGGGGGAGGATGCTGAAGAGTTCAAACCAGAGAGATTTTCAGAAGGG   |
| DzCYP72A21 | (1193) | TTTGGGGGGAGGATGCTGAAGAGTTCAAACCAGAGAGATTTTCAGAAGGG  |
|            | 1801   | 1850                                                |
| DzCYP18    | (1357) | -----                                               |
| DzCYP72A17 | (1240) | GTTTCAAATGCATCAAAGGGTCAGCAAGCATTCTTTCCTTTTGGTTGGGG  |
| DzCYP72A22 | (1240) | GTTTCAAATGCATCAAAGGGTCAGCAAGCATTCTTTCCTTTTGGTTGGGG  |
| DzCYP72A20 | (1291) | GTTTCAAATGCATCAAAGGGTCAGCAATGCATTCTTTCCTTTTGGTTGGGG |
| DzCYP72A21 | (1243) | GTTTCAAATGCATCAAAGGGTCAGCAATGCATTCTTTCCTTTTGGTTGGGG |
|            | 1851   | 1900                                                |
| DzCYP18    | (1357) | -----                                               |
| DzCYP72A17 | (1290) | CCCCAGAATATGTAGTGGGCAAACTTTCGCTATGATAGAAGCAAAGCTAG  |
| DzCYP72A22 | (1290) | CCCCAGAATATGTAGTGGGCAAACTTTCGCTATGATAGAAGCAAAGCTAG  |
| DzCYP72A20 | (1341) | CCCAAGAATATGTATGGGCAAACTTTCGCTATGATAGAAGCAAAGCTAG   |
| DzCYP72A21 | (1293) | CCCAAGAATATGTATGGGCAAACTTTCGCTATGATAGAAGCAAAGCTAG   |
|            | 1901   | 1950                                                |
| DzCYP18    | (1357) | -----                                               |

|            |        |                      |               |         |            |
|------------|--------|----------------------|---------------|---------|------------|
| DzCYP72A17 | (1340) | CTCTGGCAATGGTGCTTCAA | AATTTCCTCTTGA | ACTCTCA | ACCTTCCTAT |
| DzCYP72A22 | (1340) | CTCTGGCAATGGTGCTTCAA | AATTTCCTCTTGA | ACTCTCA | ACCTTCCTAT |
| DzCYP72A20 | (1391) | CTCTGGCAATGGTGCTTCAA | CATTTCCTCTTGA | CTCTCT  | TCCTTCCTAT |
| DzCYP72A21 | (1343) | CTCTGGCAATGGTGCTTCAA | CATTTCCTCTTGA | CTCTCT  | TCCTTCCTAT |

|            |        |                  |       |                                |  |
|------------|--------|------------------|-------|--------------------------------|--|
|            |        | 1951             |       | 2000                           |  |
| DzCYP18    | (1357) | -----            |       |                                |  |
| DzCYP72A17 | (1390) | ACTCATGCTCCTTACA | ATGTG | GATAACCCTTCAGCCACAATATGGAGCTCA |  |
| DzCYP72A22 | (1390) | ACTCATGCTCCTTACA | ATGTG | GATGACCCTTCAGCCACAATATGGAGCTCA |  |
| DzCYP72A20 | (1441) | ACTCATGCTCCTTACA | CTGTA | ATAACCCTTCAGCCACAATATGGAGCTCA  |  |
| DzCYP72A21 | (1393) | ACTCATGCTCCTTACA | CTGTA | ATAACCCTTCAGCCACAATATGGAGCTCA  |  |

|            |        |                        |  |      |  |
|------------|--------|------------------------|--|------|--|
|            |        | 2001                   |  | 2022 |  |
| DzCYP18    | (1357) | -----                  |  |      |  |
| DzCYP72A17 | (1440) | TCTCATCCTACATCAACTCTGA |  |      |  |
| DzCYP72A22 | (1440) | TCTAATCCTACATCAACTCTGA |  |      |  |
| DzCYP72A20 | (1491) | TCTCATCCTACATCAACTCTGA |  |      |  |
| DzCYP72A21 | (1443) | TCTCATCCTACATCAACTCTGA |  |      |  |

|            |       |                                           |   |     |   |
|------------|-------|-------------------------------------------|---|-----|---|
|            |       | 151                                       |   | 200 |   |
| DzCYP72A17 | (1)   | -----                                     |   |     |   |
| DzCYP72A22 | (1)   | -----                                     |   |     |   |
| DzCYP72A20 | (1)   | -----                                     |   |     |   |
| DzCYP72A18 | (151) | ASKGQNAFFPFGWGPRILIGVLGRVSYLVWVKPKDAGDAAE | K | T   | G |
| DzCYP72A19 | (1)   | -----                                     |   |     |   |
| DzCYP72A21 | (1)   | -----                                     |   |     |   |

|            |       |                 |                         |             |  |
|------------|-------|-----------------|-------------------------|-------------|--|
|            |       | 201             |                         | 250         |  |
| DzCYP72A17 | (17)  | RLMMGDMKDEKKSFK | EAWSRPMELTHRIAARVIPYDHQ | MAQTHGKISFK |  |
| DzCYP72A22 | (17)  | RLMMGDMKDEKKSFK | EAWSRPMELTHRIAARVIPYDHQ | MAQTHGKISFK |  |
| DzCYP72A20 | (33)  | RLMMGDMKDEKKSFK | EAWSRPMELTHRIAARVIPYDHQ | MAQTHGKISFK |  |
| DzCYP72A18 | (201) | RLMMGDMKDEKKSFK | EAWSRPMELTHRIAARVIPYDHQ | MAQTHGKISFK |  |
| DzCYP72A19 | (1)   | -----           |                         |             |  |
| DzCYP72A21 | (17)  | RLMMGDMKDEKKSFK | EAWSRPMELTHRIAARVIPYDHQ | MAQTHGKISFK |  |

|            |       |                          |                            |     |  |
|------------|-------|--------------------------|----------------------------|-----|--|
|            |       | 251                      |                            | 300 |  |
| DzCYP72A17 | (66)  | WNGTTPRVNIWNPEMSREILLNKS | GHI IKPQLNPLIRLLTMGVSTLEGE |     |  |
| DzCYP72A22 | (66)  | WNGTTPRVNIWNPEMSREILLNKS | GHI IKPQLNPLIRLLTMGVSTLEGE |     |  |
| DzCYP72A20 | (83)  | WNGTTPRVNIWNPEMSREILLNKS | GHI IKPQLNPLIRLLTMGVSTLEGE |     |  |
| DzCYP72A18 | (250) | WNGTTPRVNIWNPEMSREILLNKS | GHI IKPQLNPLIRLLTMGVSTLEGE |     |  |
| DzCYP72A19 | (1)   | -----                    |                            |     |  |
| DzCYP72A21 | (66)  | WNGTTPRVNIWNPEMSREILLNKS | GHI IKPQLNPLIRLLTMGVSTLEGE |     |  |

|            |       |                             |               |           |  |
|------------|-------|-----------------------------|---------------|-----------|--|
|            |       | 301                         |               | 350       |  |
| DzCYP72A17 | (116) | WAQRRKLINPAFHMEKLKEMVPVFRIS | CIDLVKRWENLVS | AEGSCELDV |  |
| DzCYP72A22 | (116) | WAQRRKLINPAFHMEKLKEMVPVFRIS | CIDLVKRWENLVS | AEGSCELDV |  |
| DzCYP72A20 | (133) | WAQRRKLINPAFHMEKLKEMVPVFRIS | CIDLVKRWENLVS | AEGSCELDV |  |
| DzCYP72A18 | (300) | WAQRRKLINPAFHMEKLKEMVPVFRIS | CIDLVKRWENLVS | AEGSCELDV |  |
| DzCYP72A19 | (1)   | -----                       |               |           |  |
| DzCYP72A21 | (116) | WAQRRKLINPAFHMEKLKEMVPVFRIS | CIDLVKRWENLVS | AEGSCELDV |  |

|            |       |                                              |          |     |  |
|------------|-------|----------------------------------------------|----------|-----|--|
|            |       | 351                                          |          | 400 |  |
| DzCYP72A17 | (165) | WPEFQSLTGDVISRTAFGSSFEEGKQIFELQKEQAVLVIEAS   | RSIYLPGF |     |  |
| DzCYP72A22 | (165) | WPEFQSLTGDVISRTAFGSSFEEGKQIFELQKEQAVLVIEAS   | RSIYLPGF |     |  |
| DzCYP72A20 | (182) | WPEFQSLTGDVISRTAFGSSFEEGKQIFELQKEQAVLVIEAARS | SIYLPGF  |     |  |
| DzCYP72A18 | (349) | WPEFQSLTGDVISRTAFGSSFEEGKQIFELQKEQAVLVIEAARS | SIYLPGF  |     |  |
| DzCYP72A19 | (1)   | -----                                        |          |     |  |
| DzCYP72A21 | (166) | WPEFQSLTGDVISRTAFGSSFEEGKQIFELQKEQAVLVIEAARS | SIYLPGF  |     |  |

|            |       |                          |                  |              |  |
|------------|-------|--------------------------|------------------|--------------|--|
|            |       | 401                      |                  | 450          |  |
| DzCYP72A17 | (215) | RFLPTAKNKRMFIDSEIKRMLRDI | IHKKIDSMKIGEN    | ADDDLLSLLLQS |  |
| DzCYP72A22 | (215) | RFLPTAKNKRMFIDSEIKRMLRDI | IHKKIDSMKIGEN    | ADDDLLSLLLQS |  |
| DzCYP72A20 | (232) | RFLPTAKNKRMFIDSEIKRMLRDI | IHKKIDSMKIGENTDD | DDLLSLLLQS   |  |

DzCYP72A18 (399) RFLPTAKNRRMFIDSEIKRMLRDI IHKKIDSMKIGENTDDDLLSLFTICN  
DzCYP72A19 (1) -----  
DzCYP72A21 (216) RFLPTAKNRRMFIDSEIKRMLRDI IHKKIDSMKIGENTDDDLLSLLQS  
451 500  
DzCYP72A17 (265) DTMNVVAEDKNKKNNGITIDDVIEECKLFYFAGQEGTSILLTWTLLLSM  
DzCYP72A22 (265) NTMNVAAEDKNKKNNGITIDDVIEECKLFYFAGQEGTSILLTWTLLLSM  
DzCYP72A20 (282) DTMNVATEDKNKKNNGITIDDVIEECKLFYFAGQEGTSILLTWTLLLSM  
DzCYP72A18 (449) PIL-----  
DzCYP72A19 (1) -----M  
DzCYP72A21 (266) DTMNVATEDKNKKNNGITIDDVIEECKLFYFAGQEGTSILLTWTLLLSM  
501 550  
DzCYP72A17 (315) YPSWQKKAREEVLNNCGKNTPEFENISHLKIVNMILHEVLRLYPPGVTLI  
DzCYP72A22 (315) YPSWQKKAREEVLNNCRKNTPEFENISHLKIVNMILHEVLRLYPPGVTLI  
DzCYP72A20 (332) YPTWQKKAREEVLNTCGKNTPEFENISHLKIVNMILHEVLRLYPPVITLF  
DzCYP72A18 (452) -----  
DzCYP72A19 (2) YPTWQKKAREEVLNTCGKNTPEFENVSHLKIVNMILHEVLRLYPPVITLF  
DzCYP72A21 (316) YPTWQKKAREEVLNTFGKNTPEFENISHLKIVNMILHEVLRLYPPVITLF  
551 600  
DzCYP72A17 (365) RYINKKVKVGNITLPAGAEVLIPILQVHHDPEIWGEDAEEFKPERFSEGV  
DzCYP72A22 (365) RYINKKVKVGNITLPAGAEVLIPILQVHHDPEIWGEDAEEFKPERFSEGV  
DzCYP72A20 (382) RHINKNVKLGDITLPAGAEVLIPILQVHHDPEIWGRMLKSSKPERFSEGV  
DzCYP72A18 (452) -----  
DzCYP72A19 (52) RHINKNVKLGDITLPAGAEVVIPIILQVHHDPEIWGEDAEEFKPERFSEGV  
DzCYP72A21 (366) RHINKNVKLGDITLPAGAEVLIPILQVHHDPEIWGEDAEEFKPERFSEGV  
601 650  
DzCYP72A17 (415) SNASKGQQAFFPFGWGPRICSGQTFAMIEAKLALAMVLQNFSEFELSPSYT  
DzCYP72A22 (415) SNASKGQQAFFPFGWGPRICSGQTFAMIEAKLALAMVLQNFSEFELSPSYT  
DzCYP72A20 (432) SNASKGQNAFFPFGWGPRICIGQTFAMIEAKLALAMVLQHFSFDLSPSYT  
DzCYP72A18 (452) -----  
DzCYP72A19 (102) SNASKGQNAFFPFGWGPRICIGQTFAMIEAKLALAMVLQHFSFDLSPSYT  
DzCYP72A21 (416) SNASKGQNAFFPFGWGPRICIGQTFAMIEAKLALAMVLQHFSFDLSPSYT  
651 672  
DzCYP72A17 (465) HAPYNVITLQPQYGAHLILHQL  
DzCYP72A22 (465) HAPYNVMTLQPQYGAHLILHQL  
DzCYP72A20 (482) HAPYTVITLQPQYGAHLILHQL  
DzCYP72A18 (452) -----  
DzCYP72A19 (152) HAPYTVITLQPQYGAHLILHQL  
DzCYP72A21 (466) HAPYTVITLQPQYGAHLILHQL

1 50  
DzCYP72A1 (1) ATGGAGTCAGTGATGGGAGTGGTATGGGCGGCGGCGGCGGTGGCGGTG--  
DzCYP72A8 (1) ATGGAGTCAGTGATGGGAGTGGTATGGGCGGCGGCGGCGGTGGCGGTG--  
DzCYP72A2 (1) ATGGAGTCAGTGATGGGAGTGGTATGGGCGGCGGCGGCGGTGGCGGTG--  
DzCYP72A9 (1) ATGGAGTCAGTGATGGGAGTGGTATGGGCGGCGGCGGCGGTGGCGGTG--  
DzCYP72A5 (1) ATGGAGTCAGTGATGGGAGTGGTATGGGCGGCGGCGGCGGTGGCGGTG--  
DzCYP72A10 (1) ATGGAGTTAGTGATGAGAGTGGTATGGGCGGTGGCGGCGGTGGCGGTG--  
DzCYP72A3 (1) ATGGAGTTAGTGATGGGAGTGGTATGGGCGG-----CGGTGGCGGTG--  
DzCYP72A6 (1) ATGGAGTTAGTGATGGGAGTGGTATGGGCGG-----CGGTGGCGGTG--  
DzCYP72A11 (1) ATGGAGTTAGTGATGGGAGTGGTATGGGCGGCGGCGGTGGTGATGCTG--  
DzCYP72A4 (1) ATGGAGTTAGTGATGGGAGTGGTATGGGCGGCGGCGGTGGTGATGCTG--  
DzCYP72A7 (1) -----  
DzCYP72A12 (1) ATGGAGTCACTGATGGGAGTGAATATGGGCGGTGGCGGCGGTGGTG--

DzCYP72A13 (1) ATGGAGT TAGTGATGGGAGTGAATATGGACGGTGA CGGCGGCGGTGGTG--  
51 100

DzCYP72A1 (49) ----GTGGCGTGGGCGTGGAGGACGTTGGATTGGGTTTGGTGGAAAGCCGA  
DzCYP72A8 (49) ----GTGGCGTGGGCGTGGAGGACGTTGGATTGGGTTTGGTGGAAAGCCGA  
DzCYP72A2 (51) GGTG GTGGCGTGGGCGTGGAGGACGTTGGATTGGGTTTGGTGGACGCCGA  
DzCYP72A9 (51) GGTG GTGGCGTGGGCGTGGAGGACGTTGGATTGGGTTTGGTGGACGCCGA  
DzCYP72A5 (49) ----GTGGCGTGGGCGTGGAGGACGTTGGATTGGGTTTGGTGGACGCCGA  
DzCYP72A10 (49) ----GTGGCGTGGGCGTGGAGGACGTTGGATTGGGTTTGGTGGACGCCGA  
DzCYP72A3 (43) ----GTGGCGTGGGCGTGGAGGACGTTGGATTGGGTTTGGTGGACGCCGA  
DzCYP72A6 (43) ----GTGGCGTGGGCGTGGAGGACGTTGGATTGGGTTTGGTGGACGCCGA  
DzCYP72A11 (49) ----GTGGCGTGGGCGTGGAGGACGTTGGATTGGGTTTGGCGGACGCCGA  
DzCYP72A4 (49) ----GTGGCGTGGGCGTGGAGGACGTTGGATTGGGTTTGGCGGACGCCGA  
DzCYP72A7 (1) -----A  
DzCYP72A12 (49) ----GTGGCGGCCGCGTGGAGGACGTTGGATTGGATTGGTGGACGCCGA  
DzCYP72A13 (49) ----GTGGTGTGGGCGTGGAGGACGTTGGATTGGGTTTGGTGGACGCCGA  
101 150

DzCYP72A1 (95) GGAGGCTGGATCGGGA ACTCCGGCGGCAGGGCCTGCGCGGCAACCAGTAC  
DzCYP72A8 (95) GGAGGCTGGATCGGGA ACTCCGGCGGCAGGGCCTGCGCGGCAACCAGTAC  
DzCYP72A2 (101) GGAGGCTGGATCGGGA ACTCCGGCGGCAGGGCCTGCGCGGCAACCAGTAC  
DzCYP72A9 (101) GGAGGCTGGATCGGGA ACTCCGGCGGCAGGGCCTGCGCGGCAACCAGTAC  
DzCYP72A5 (95) GGAGGCTGGATCGGGA ACTCCGGCGGCAGGGCCTGCGCGGCAACCAGTAC  
DzCYP72A10 (95) GGAGGCTGGATCGGGA ACTCCGGCGGCAGGGCCTGCGCGGCAACCAGTAC  
DzCYP72A3 (89) GGAGGCTGGATCGGGA ACTCCGGCGGCAGGGCCTGCGCGGCAACCAGTAC  
DzCYP72A6 (89) GGAGGCTGGACCGGGAGCTCCGGCGGCAGGGCCTGCGCGGCAACCAGTAC  
DzCYP72A11 (95) TGAGGCTGGACCGGGAGCTCCGGCGGCAGGGCCTGCGCGGCAACCAGTAC  
DzCYP72A4 (95) TGAGGCTGGACCGGGAGCTCCGGCGGCAGGGCCTGCGCGGCAACCAGTAC  
DzCYP72A7 (2) TGAGGCTGGACCGGGAGCTCCGGCGGCAGGGCCTGCGCGGCAACCAGTAC  
DzCYP72A12 (95) GGAGGCTGGACCGGGAGCTCCGACGCAGGGCCTGCGCGGCAACCAGTAC  
DzCYP72A13 (95) GGAGGCTGGACCGGGATCTCCGGCGGCAGGGCCTGCGCGGCAACCAGTAC  
151 200

DzCYP72A1 (145) CGACTCTTGCA CGGCGATCTCAAGGAAAACGCCGGCTCTCCGAGAGGC  
DzCYP72A8 (145) CGACTCTTGCA CGGCGATCTCAAGGAAAACGCCGGCTCTCCGAGAGGC  
DzCYP72A2 (151) CGAGTCTTGCA CGGCGATCTCAAGGAAAACGCCGGCTATCCGAGAGGC  
DzCYP72A9 (151) CGAGTCTTGCA CGGCGATCTCAAGGAAAACGCCGGCTATCCGAGAGGC  
DzCYP72A5 (145) CGAGTCTTGCA CGGCGATCTCAAGGAAAACACCCGGCTATCCGAGAGGC  
DzCYP72A10 (145) CGACTCTTGCA CGGCGATCTCAAGGAAAACGCCAGCTCTCCGAGAGGC  
DzCYP72A3 (139) CGACTCTTGCA CGGCGATCTCAAGGAAAACGCCAGCTCTCCGAGAGGC  
DzCYP72A6 (139) CGAGTATTGCA CGGCGATCTCAAGGAAAACGCCAGCTCTCCGAGAGGC  
DzCYP72A11 (145) CGAGTCTTCCATGGCGATCTCAAGGAAAACGCCGGCTCTCGAAGGAGGC  
DzCYP72A4 (145) CGAGTCTTCCATGGCGATCTCAAGGAAAACGCCGGCTCTCGAAGGAGGC  
DzCYP72A7 (52) CGAGTCTTCCATGGCGATCTCAAGGAAAACGCCGGCTCTCGAAGGAGGC  
DzCYP72A12 (145) CGAGTCTTGCA CGGCGATCTCAAGGAAAACGTCGGGCTCTCGAAGGAGGC  
DzCYP72A13 (145) CGATTATTGCA CGGCGATCTCAAGGAAAACGCCGGCTCTCCAGGAGGC  
201 250

DzCYP72A1 (195) TAAATCCCGGCCTCTGCCTCTTCACTGCCATGACATCGCCCCCGCGTTT  
DzCYP72A8 (195) TAAATCCCGGCCTCTGCCTCTTCACTGCCATGACATCGCCCCCGCGTTT  
DzCYP72A2 (201) TAAATCCCGGCCTCTGCCTCTTCACTGCCATGACATCGCCCCCGCGTTT  
DzCYP72A9 (201) TAAATCCCGGCCTCTGCCTCTTCACTGCCATGACATCGCCCCCGCGTTT  
DzCYP72A5 (195) TAAATCCCGGCCTCTGCCTCTTCACTGCCATGACATCGCCCCCGCGTTT  
DzCYP72A10 (195) TAAATCCCGGCCTCTGCCTCTTCACTGCCATGACATCGCCCCCGCGTTT  
DzCYP72A3 (189) TAAATCCCGGCCTCTGCCTCTTCACTGCCATGACATCGCCCCCGCGTTT  
DzCYP72A6 (189) TAAATCCCGGCCTCTGCCTCTTCACTGCCATGACATCGCCCCCGCGTTT  
DzCYP72A11 (195) TGAATCCCGGCCTCTGCCTCTTCACTGCCATGACATCGCCCCCGCGTTT  
DzCYP72A4 (195) TGAATCCCGGCCTCTGCCTCTTCACTGCCATGACATCGCCCCCGCGTTT  
DzCYP72A7 (102) TGAATCCCGGCCTCTGCCTCTTCACTGCCATGACATCGCCCCCGCGTTT  
DzCYP72A12 (195) TAAATCCCGGCCTCTGCCTCTTCACTGCCATGACATCGCCCCCGCGTTT  
DzCYP72A13 (195) TAAATCCCGGCCTCTGCCTCTTCACTGCCATGACATCGTCCCAGGTTT

|            |       |            |                                               |     |
|------------|-------|------------|-----------------------------------------------|-----|
|            |       | 251        |                                               | 300 |
| DzCYP72A1  | (245) | TCCCTGTC   | TCCACAACGCCATCAAAGATCACGGTAAAATCTCAATAACT     |     |
| DzCYP72A8  | (245) | TCCCTGTC   | TCCACAACGCCATCAAAGATCACGGTAAAATCTCAATAACT     |     |
| DzCYP72A2  | (251) | TCCCTGTC   | TCCACAACGCCATCAAAGATCACGGTAAAATCTCAATAACT     |     |
| DzCYP72A9  | (251) | TCCCTGTC   | TCCACAACGCCATCAAAGATCACGGTAAAATCTCAATAACT     |     |
| DzCYP72A5  | (245) | TCCCTGTC   | TCCACAACGCCATCAAAGATCACGGTAAAATCTCAATAACT     |     |
| DzCYP72A10 | (245) | TCCCTCTCT  | TCCACAACGCCATCAAAGATCACGGTAAAATCTCAATAACT     |     |
| DzCYP72A3  | (239) | TCCCTCTCT  | TCCACAACGCCATCAAAGATCACGGTAAAATCTCAATAACT     |     |
| DzCYP72A6  | (239) | TCCCTCTCT  | TCCACAACGCCATCAAAGATCACG-----                 |     |
| DzCYP72A11 | (245) | TCCCTCTCT  | TCCACAACGCCATCAAAGATCATGGTAAAATCTCAATAACT     |     |
| DzCYP72A4  | (245) | TCCCTCTCT  | TCCACAACGCCATCAAAGATCACGGTAAAATCTCAATAACT     |     |
| DzCYP72A7  | (152) | TCCCTCTCT  | TCCACAACGCCATCAAAGATCACGGTAAAATCTCAATAACT     |     |
| DzCYP72A12 | (245) | TCCCTCTCT  | TCCACAACGCCATCAAAGATCACGGTAAAATCTCAATAACT     |     |
| DzCYP72A13 | (245) | CCCTCTCA   | TCCACAACGCCATCAAAGATCACGGTAAAATCTCAATAACT     |     |
|            |       | 301        |                                               | 350 |
| DzCYP72A1  | (295) | TGGTTTGGG  | CCTTACCCAAGAGTGACCTTAATGGAGCCAGAGCTAGTCAA     |     |
| DzCYP72A8  | (295) | TGGTTTGGG  | CCTTACCCAAGAGTGACCTTAATGGAGCCAGAGCTAGTCAA     |     |
| DzCYP72A2  | (301) | TGGTTTGGG  | CCTTACCCAAGAGTGACCTTAATGGAGCCAGAGCTAGTGAA     |     |
| DzCYP72A9  | (301) | TGGTTTGGG  | CCTTACCCAAGAGTGACCTTAATGGAGCCAGAGCTAGTGAA     |     |
| DzCYP72A5  | (295) | TGGTTTGGG  | CCTTACCCAAGAGTGACCTTAATGGAGCCAGAGCTAGTGAA     |     |
| DzCYP72A10 | (295) | TGGCTTGGT  | CCTTACCCAAGAGTGATCTTAACAGAGCCAGAGCTAGTGAA     |     |
| DzCYP72A3  | (289) | TGGCTTGGT  | CCTTACCCAAGAGTGATCTTAGCAGAGCCAGAGCTAGTGAA     |     |
| DzCYP72A6  | (272) | -----      | AGCCAGAGCTAGTGAA                              |     |
| DzCYP72A11 | (295) | TGGCTTGGC  | CCTTATCCAAGAGTGACCTTAACGGAAACCAGAACTAGTTAT    |     |
| DzCYP72A4  | (295) | TGGCTTGGC  | CCTTGTCCAAGAGTGACCTTAACGGAAACCAGAACTAGTAAA    |     |
| DzCYP72A7  | (202) | TGGCTTGGC  | CCTTGTCCAAGAGTGACCTTAACGGAAACCAGAACTAGTAAA    |     |
| DzCYP72A12 | (295) | TGGCTTGGC  | CCTTATCCAAGAGTGACCTTAACAGAGCCAGAGCTAGTGAA     |     |
| DzCYP72A13 | (295) | TGGCTTGGAC | CCTTATCCAAGAGTGCTCTTGATGGAAACCAGATTAGTGAA     |     |
|            |       | 351        |                                               | 400 |
| DzCYP72A1  | (345) | AGAAGTGT   | TGCAAAACAAGTTTGGACATTTTGTAAAAATAAGAGCAACTC    |     |
| DzCYP72A8  | (345) | AGAAGTGT   | TGCAAAACAAGTTTGGACATTTTGTAAAAATAAGAGCAACTC    |     |
| DzCYP72A2  | (351) | AGAAGTGT   | TGCAAAACAAGTTTGGACATTTTGTAAAAATAAGAGCAAAATC   |     |
| DzCYP72A9  | (351) | AGAAGTGT   | TGCAAAACAAGTTTGGACATTTTGTAAAAATAAGAGCAAAATC   |     |
| DzCYP72A5  | (345) | AGAAGTGT   | TGCAAAACAAGTTTGGACATTTTGTAAAAATAAGAGCAAAATC   |     |
| DzCYP72A10 | (345) | AGAAGTACT  | CTCAAAACAAGTTTGGACATTTTGTAAAAATAAGAGTACAACCTC |     |
| DzCYP72A3  | (339) | AGAAGTACT  | CTCAAAACAAGTTTGGACATTTTGTAAAAATAAGAGTACAACCTC |     |
| DzCYP72A6  | (288) | AGAAGTACT  | CTCAAAACAAGTTTGGACATTTTGTAAAAATAAGAGTACAACCTC |     |
| DzCYP72A11 | (345) | AGAAGTGTT  | ---AAACAAGTTTGGACATTTTGTAAAAATAAGAGTACAACCTC  |     |
| DzCYP72A4  | (345) | AGAAGTGTT  | ---AAACAAGTTTGGACATTTTGTAAAAATAAGAGTACAACCTC  |     |
| DzCYP72A7  | (252) | AGAAGTGTT  | ---AAACAAGTTTGGACATTTTGTAAAAATAAGAGTACAACCTC  |     |
| DzCYP72A12 | (345) | AGAAGTGCT  | GTCAAAACAAGTTTGGACATTTTGTAAAAATAAGAGTACAACCTC |     |
| DzCYP72A13 | (345) | AGAAGTACT  | GTCAAAACAAGTTTGGACATTTTGTAAAAATAAGAGTACAACCTC |     |
|            |       | 401        |                                               | 450 |
| DzCYP72A1  | (395) | CCCTTGCCAA | TTTFTTGGTCCAAGGACTTGTGACTTATGAAGGTGAAAAG      |     |
| DzCYP72A8  | (395) | CCCTTGCCAA | TTTFTTGGTCCAAGGACTTGTGACTTATGAAGGTGAAAAG      |     |
| DzCYP72A2  | (401) | CCCTTACCAA | TTTATTTGGTCCAAGGACTTGTAGTTTATGAAGGTGAAAAG     |     |
| DzCYP72A9  | (401) | CCCTTACCAA | TTTATTTGGTCCAAGGACTTGTAGTTTATGAAGGTGAAAAG     |     |
| DzCYP72A5  | (395) | CCCTTACCAA | TTTATTTGGTCCAAGGACTTGTAGTTTATGAAGGTGAAAAG     |     |
| DzCYP72A10 | (395) | CCCTTGCCAA | TTTFTTGGTCCAAGGGCTTGCGTCTTATGACGGTGAAAAG      |     |
| DzCYP72A3  | (389) | CCCTTGCCAA | TTTFTTGGTCCAAGGGCTTGCGTCTTATGACGGTGAAAAG      |     |
| DzCYP72A6  | (338) | CCCTTGCCAA | TTTFTTGGTCCAAGGGCTTGCGTCTTATGACGGTGAAAAG      |     |
| DzCYP72A11 | (392) | CTTTTGCCAA | TTTFTTGGTCCAAGGGCTTGTGCTTATGAAGGTGAAAAG       |     |
| DzCYP72A4  | (392) | CTTTTGCCAA | TTTFTTGGTCCAAGGGCTTGTGCTTATGAAGGTGAAAAG       |     |
| DzCYP72A7  | (299) | CTTTTGCCAA | TTTFTTGGTCCAAGGGCTTGTGCTTATGAAGGTGAAAAG       |     |
| DzCYP72A12 | (395) | CTTTAGCCAA | TTTFTTGGTCCAAGGGCTTGTGCTTATGAAGGTGAAAAG       |     |
| DzCYP72A13 | (395) | CTATTGCCAA | TTTFTTGGTCCAAGGACTTGTAGCTTATGAAGGTGAAAAG      |     |
|            |       | 451        |                                               | 500 |

|            |       |                                                      |
|------------|-------|------------------------------------------------------|
| DzCYP72A1  | (445) | TGGGCCAAACATAGAAAGGATCATCAACCCTGCATTCCATCTTGAGAAACT  |
| DzCYP72A8  | (445) | TGGGCCAAACATAGAAAGGATCATCAACCCTGCATTCCATCTTGAGAAACT  |
| DzCYP72A2  | (451) | TGGGCCAAACACAGAAGGATCATCAACCCTGCATTCCATCTTGAGAAACT   |
| DzCYP72A9  | (451) | TGGGCCAAACACAGAAGGATCATCAACCCTGCATTCCATCTTGAGAAACT   |
| DzCYP72A5  | (445) | TGGGCCAAACACAGAAGGATCATCAACCCTGCATTCCATCTTGAGAAACT   |
| DzCYP72A10 | (445) | TGGGTCAAACACAGAGGATCATCAACCCTGCATTCCATTTTGAGAAACT    |
| DzCYP72A3  | (439) | TGGGTCAAACACAGAAGGATCATCAACCCTGCATTCCATTTTGAGAAACT   |
| DzCYP72A6  | (388) | TGGGTCAAACACAGAAGGATCATCAACCCTGCATTCCATTTTGAGAAACT   |
| DzCYP72A11 | (442) | TGGGCCAAACATAGAAAGGATCTCAACCCTGCATTCCATCTTGAGAAACT   |
| DzCYP72A4  | (442) | TGGGCCAAACATAGAAAGGATACTCAACCCTGCATTCCATCTTGAGAAACT  |
| DzCYP72A7  | (349) | TGGGCCAAACATAGAAAGGATCTCAACCCTGCATTCCATCTAGAGAAACT   |
| DzCYP72A12 | (445) | TGGGCCAAACACAGAAGGATCATCAATCCTGCATTCCATCTTGAGAAACT   |
| DzCYP72A13 | (445) | TGGGCCAAACACAGAAGGATAATTAAACCCTGCATTCCATCTTGAGAAACT  |
|            |       | 501                                                  |
| DzCYP72A1  | (495) | AAAGCTAATGCTTCCAGCATTCTCTACATCTTGTGGTGAAC TGATTAGAA  |
| DzCYP72A8  | (495) | AAAGCTAATGCTTCCAGCATTCTCTACATCTTGTGGTGAAC TGATTAGAA  |
| DzCYP72A2  | (501) | AAAGCTAATGCTTCCAGCATTCTCTACATCTTGTGGTGAAC TGATTAGAA  |
| DzCYP72A9  | (501) | AAAGCTAATGCTTCCAGCATTCTCTACATCTTGTGGTGAAC TGATTAGAA  |
| DzCYP72A5  | (495) | AAAGCTAATGCTTCCAGCATTCTCTACATCTTGTGGTGAAC TGATTAGAA  |
| DzCYP72A10 | (495) | AAAGCAAATGCTGCCAGCATTCTCTACGTCTTGTGGTGAAC TTATTAGAA  |
| DzCYP72A3  | (489) | AAAGCAAATGCTGCCAGCATTCTCTACGTCTTGTGGTGAAC TTATTAGAA  |
| DzCYP72A6  | (438) | AAAGCAAATGCTGCCAGCATTCTCTACGTCTTGTGGTGAAC TTATTAGAA  |
| DzCYP72A11 | (492) | AAAGCTAATGTTGCCAGCATTCTCTACATCTTGTAGTGAATTGATTAGAA   |
| DzCYP72A4  | (492) | AAAGCTAATGTTGCCAGCATTCTCTACATCTTGTAGTGAATTGATTAGAA   |
| DzCYP72A7  | (399) | AAATCTAATGTTGCCAGCATTCTCTACATCTTGTAGTGAATTGATTAGAA   |
| DzCYP72A12 | (495) | AAAGCTAATGCTGCCAGCATTCTCTACATCTTCTGGTGAAC TGATTAGAA  |
| DzCYP72A13 | (495) | AAAGCTAATGCTGCCAGCATTCTCTACATCTTCTGGTGAAC TGATTAGAA  |
|            |       | 551                                                  |
| DzCYP72A1  | (545) | GATGGGAGAAGATGATCCCTGATGAAGGCTCCCAAGAACTAAATGTCTTT   |
| DzCYP72A8  | (545) | GATGGGAGAAGATGATCCCTGATGAAGGCTCCCAAGAACTAAATGTCTTT   |
| DzCYP72A2  | (551) | GATGGGAGAAGATGATCCCTGATGAAGGCTCCCATGAACTAAATGTCTTT   |
| DzCYP72A9  | (551) | GATGGGAGAAGATGATCCCTGATGAAGGCTCCCATGAACTAAATGTCTTT   |
| DzCYP72A5  | (545) | GATGGGAGAAGATGATCCCTGATGAAGGCTCCCATGAACTAAATGTCTTT   |
| DzCYP72A10 | (545) | GATGGAAACAAGATGATCCCTGATGAAGGCTCCCAAGAACTAAATGTCTTT  |
| DzCYP72A3  | (539) | GATGGAAACAAGATGATCCCTGATGAAGGCTCCCAAGAACTAAATGTCTTT  |
| DzCYP72A6  | (488) | GATGGAAACAAGATGATCCCTGATGAAGGCTCCCAAGAACTAAATGTCTTT  |
| DzCYP72A11 | (542) | GATGGGAGGAGAAGATTCTGATGAAGGCTCCCAAGAACTAAATGTCTTT    |
| DzCYP72A4  | (542) | GATGGGAGAAGATGATTCCTGATGAAGGCTCCCAAGAACTAAATGTCTTT   |
| DzCYP72A7  | (449) | GATGGGAGAAGATGATTCCTGATGAAGGCTCCCAAGAACTAAATGTCTTT   |
| DzCYP72A12 | (545) | GATGGGAGAAGATGATTCCTAATGAAGGCTCCCAAGAACTAAATGTCTTT   |
| DzCYP72A13 | (545) | GATGGGAGAAGATGATTCCTGATGAAGGCTCCCAAGAACTAAATGTCTTC   |
|            |       | 601                                                  |
| DzCYP72A1  | (595) | TCCAGAGCTCCAAGACCTCACAAAAGATGTCATCTCCAGGACTGCATTTCG  |
| DzCYP72A8  | (594) | TCCAGAGCTCCAAGACCTCACAAAAGATGTCATCTCCAGGACTGCATTTCG  |
| DzCYP72A2  | (600) | TCCAGAGCTCCAAGACCTCACAAAAGATGTCATCTCCAGGACTGCATTTCG  |
| DzCYP72A9  | (600) | TCCAGAGCTCCAAGACCTCACAAAAGATGTCATCTCCAGGACTGCATTTCG  |
| DzCYP72A5  | (594) | TCCAGAGCTCCAAGACCTCACAAAAGATGTCATCTCCAGGACTGCATTTCG  |
| DzCYP72A10 | (594) | TCCAGAGCTCCAAGGCCTCACAAAAGATATCATCTCCAGAACCGCATTTCG  |
| DzCYP72A3  | (588) | TCCAGAGCTCCAAGGCCTCACAAAAGATATCATCTCCAGAACCGCATTTCG  |
| DzCYP72A6  | (537) | TCCAGAGCTCCAAGGCCTCACAAAAGATATCATCTCCAGAACCGCATTTCG  |
| DzCYP72A11 | (591) | TCCAGAGCTCCAAGGCCTCACAAAAGATGTCATCTCTAGGACTGCATTTCG  |
| DzCYP72A4  | (591) | TCCAGAGCTCCAAGGCCTCACAAAAGATGTCATCTCTAGGACTGCATTTCG  |
| DzCYP72A7  | (498) | TCCAGAGCTCCAAGGCCTCACAAAAGATGTCATCTCTAGGACTGCATTTCG  |
| DzCYP72A12 | (594) | TCCAGAGCTCCAAGACCTCACAAAAGATGTCATCTCCAGGACTGCATTTCG  |
| DzCYP72A13 | (594) | GCCAGAGATCCAATAACCTCACAGGAGATGTCATCTCCAGGACTGCATTTCG |
|            |       | 651                                                  |
| DzCYP72A1  | (645) | -TAGCAGCTATGAAGAAAGAG---AAGAATATTTGAACTCCTAGCAGAA    |
|            |       | 700                                                  |



|            |       |                                                     |                          |
|------------|-------|-----------------------------------------------------|--------------------------|
| DzCYP72A8  | (644) | GTAGCAGCTATGAAGAAGGAAG----                          | AAGAATATTTGAACTCCTAGCAGA |
| DzCYP72A2  | (650) | GTAGCAGCTATGAAGAAGGAAG----                          | AAGAATATTTGAACTCCTAGCAGA |
| DzCYP72A9  | (650) | GTAGCAGCTATGAAGAAGGAAG----                          | AAGAATATTTGAACTCCTAGCAGA |
| DzCYP72A5  | (643) | GTAGCAGCTATGAAGAAGGAAGGAAG                          | AAGAATATTTGAACTACTAGCAGA |
| DzCYP72A10 | (644) | GTAGCAGCTATGAAGAAGGGAG----                          | AAGAATATTTGAACTCCTAACTGA |
| DzCYP72A3  | (638) | GTAGCAGCTATGAAGAAGGGAG----                          | AAGAATATTTGAACTCCTAACTGA |
| DzCYP72A6  | (587) | GTAGCAGCTATGAAGAAGGGAG----                          | AAGAATATTTGAACTCCTAACTGA |
| DzCYP72A11 | (641) | GTAGCAGCTATGAAGAAGGGAG----                          | AAGAATATTTGAACTCCTAAAAGA |
| DzCYP72A4  | (641) | GTAGCAGCTATGAAGAAGGGAG----                          | AAGAATATTTGAACTCCTAAAAGA |
| DzCYP72A7  | (548) | GTAGCAGCTATGAAGAAGGGAG----                          | AAGAATATTTGAACTCCTAAAAGA |
| DzCYP72A12 | (644) | GTAGCAGTTACGAAGACGGAAG----                          | AAGAATATTTGAACTCCTAACAGA |
| DzCYP72A13 | (644) | GTAGCAGCTATGAAGAAGGGAG----                          | AAGAATATTTGAACTCCTAACAGA |
|            |       | 701                                                 | 750                      |
| DzCYP72A1  | (690) | GCAAATTCAGCTTCTTATCCAGCTTTCCAGACTATATACATCCCTGGTT   |                          |
| DzCYP72A8  | (690) | GCAAATTCAGCTTCTTATCCAGCTTTCCAGACTATATACATCCCTGGTT   |                          |
| DzCYP72A2  | (696) | GCAAATTCAGCTTCTTATCCAGCTTTCCAGACTATATACATCCCTGGTT   |                          |
| DzCYP72A9  | (696) | GCAAATTCAGCTTCTTATCCAGCTTTCCAGACTATATACATCCCTGGTT   |                          |
| DzCYP72A5  | (693) | GCAAATTCAGCTTCTTATCCAGCTTTCCAGACTTTATACATCCCTGGTT   |                          |
| DzCYP72A10 | (690) | ACAAATTAAGCTTACTATTCCAGCTTTCAAGACTGTATACATCCCTGGTT  |                          |
| DzCYP72A3  | (684) | ACAAATTAAGCTTACTATTCCAGCTTTCAAGACTGTATACATCCCTGGTT  |                          |
| DzCYP72A6  | (633) | ACAAATTAAGCTTACTATTCCAGCTTTCAAGACTGTATACATCCCTGGTT  |                          |
| DzCYP72A11 | (687) | GCAAATTCAGCTTTATATTCAAGTTTACAAGACTGTATACATCCCTGGTT  |                          |
| DzCYP72A4  | (687) | GCAAATTCAGCTTTATATTCAAGTTTACAAGACTGTATACATCCCTGGTT  |                          |
| DzCYP72A7  | (594) | GCAAATTCAGCTTTATATTCAAGTTTACAAGACTGTATACATCCCTGGTT  |                          |
| DzCYP72A12 | (690) | GCAAATTCAGCTTCTTATCCAGCTTTCCAGACTGTATACATCCCTGGTT   |                          |
| DzCYP72A13 | (690) | GCAAATTCATCTTACTATTCCAGCTTTGCAGACTGTATACATCCCTGGTT  |                          |
|            |       | 751                                                 | 800                      |
| DzCYP72A1  | (740) | ATCGATTTTCTGCCCACACCAATGAACAAAAGAAGAAGCCAAGTGTACAAT |                          |
| DzCYP72A8  | (740) | ATCGATTTTCTGCCCACACCAATGAACAAAAGAAGAAGCCAAGTGTACAAT |                          |
| DzCYP72A2  | (746) | ATCGATTTTCTGCCCACACCAATGAACAAAAGAAGAAGCCAAGTGTACAAT |                          |
| DzCYP72A9  | (746) | ATCGATTTTCTGCCCACACCAATGAACAAAAGAAGAAGCCAAGTGTACAAT |                          |
| DzCYP72A5  | (743) | ATCGATTTTCTGCCCACACCAATGAACAAAAGAAGAAGCCAAGTGTACAAT |                          |
| DzCYP72A10 | (740) | ATCAATTTTCTGCCCACACCAATGAACAAAAGAAGAAGCCAAGTGTACAAT |                          |
| DzCYP72A3  | (734) | ATCGATTTTCTGCCCACACCAATGAACAAAAGAAGAAGCCAAGTGTACAAT |                          |
| DzCYP72A6  | (683) | ATCGATTTTCTGCCCACACCAATGAACAAAAGAAGAAGCCAAGTGTACAAT |                          |
| DzCYP72A11 | (737) | ATCGATTTTCTGCCCACACCAATGAACAAAAGAAGAAGCCAAGTATATAAT |                          |
| DzCYP72A4  | (737) | ATCGATTTTCTGCCCACACCAATGAACAAAAGAAGAAGCCAAGTATACAAT |                          |
| DzCYP72A7  | (644) | ATCGATTTTCTGCCCACACCAATGAACAAAAGAAGAAGCCAAGTATACAAT |                          |
| DzCYP72A12 | (740) | TTCGATTTTCTGCCCACACCAATGAACAAAAGAAGCAGCCAAGTGTACAAT |                          |
| DzCYP72A13 | (740) | ATCGGTTTCTGCCCACACCAATGAACAAAGAAGAAGCCAAGTTACAAT    |                          |
|            |       | 801                                                 | 850                      |
| DzCYP72A1  | (790) | GAGATGAAAAGAATTCTTAAAGGCATGATAG-                    | AGAAGAGAGAGAAGGCCA       |
| DzCYP72A8  | (790) | GAGATGAAAAGAATTCTTAAAGGCATGATCG-                    | AGAAGAGAGAGAAGGCCA       |
| DzCYP72A2  | (796) | GAGATGAAAAGAATTCTTAAAGGCATGATAG-                    | AGAAGAGAGAGAAGGCCA       |
| DzCYP72A9  | (796) | GAGATGAAAAGAATTCTTAAAGGCATGATAG-                    | AGAAGAGAGAGAAGGCCA       |
| DzCYP72A5  | (793) | GAGATGAAAAGAATTCTTAAAGGCATGATCG-                    | AGAAGAGAGAGAAGGCCA       |
| DzCYP72A10 | (790) | GAGATGAAAAGAATTCTTAAAGGCATGATTG-                    | AGAAGAGAGAGAAGGCCA       |
| DzCYP72A3  | (784) | GAGATGAAAAGAATTCTTAAAGGCATGATTG-                    | AGAAGAGAGAGAAGGCCA       |
| DzCYP72A6  | (733) | GAGATGAAAAGAATTCTTAAAGGCATGATTG-                    | AGAAGAGAGAGAAGGCCA       |
| DzCYP72A11 | (787) | GAGATGAAAAGAATTCTTAAAGGCATGATTG-                    | AGAAGAGAGAAAAGGCTA       |
| DzCYP72A4  | (787) | GAGATGAAAAGAATTCTTAAAGGCATGATTGG                    | AGAAGAGAGAAAAGGCCA       |
| DzCYP72A7  | (694) | GAGATGAAAAGAATTCTTAAAGGCATGATTG-                    | AGAAGAGAGAAAAGGCCA       |
| DzCYP72A12 | (790) | GAGATGAAAAGAATTCTTATAGGCATGATTG-                    | AGAAGAGAGAGAAGGCCA       |
| DzCYP72A13 | (790) | GAGATGAAAAGAATTCTTAAAGGCATGATTG-                    | AGAAGAGAGAGAAGGCCA       |
|            |       | 851                                                 | 900                      |
| DzCYP72A1  | (839) | TAAGAATGGGGGACAGTAGCAAGAATGACCTTCTGGGTTTGT          | TACTAGAC                 |
| DzCYP72A8  | (839) | TAAGAATGGGGGGAAGGTAGCAAGAATGACCTTCTGGGTTTGT         | TACTAGAC                 |

|            |        |                                                     |
|------------|--------|-----------------------------------------------------|
| DzCYP72A2  | (845)  | TAAGAATGGGGGACAGTAGCAAGAATGACCTTCTGGGTTTGTTACTAGAC  |
| DzCYP72A9  | (845)  | TAAGAATGGGGGACAGTAGCAAGAATGACCTTCTGGGTTTGTTACTAGAC  |
| DzCYP72A5  | (842)  | TAAGAATGGGGGAAAGTAGCAAGAATGACCTTCTGGGTTTGTTACTAGAC  |
| DzCYP72A10 | (839)  | TAAGAATGGGGGAAAGTAGCAAGAATGACCTTCTGGGTTTGTTACTAGAC  |
| DzCYP72A3  | (833)  | TAAGAATGGGGGAAAGTAGCAAGAATGACCTTCTGGGTTTGTTACTAGAC  |
| DzCYP72A6  | (782)  | TAAGAATGGGGGAAAGTAGCAAGAATGACCTTCTGGGTTTGTTACTAGAC  |
| DzCYP72A11 | (836)  | TAAGAATGGGGGAAAGTTCTAAGGATGACCTTCTGGGTTTGTTACTAGAC  |
| DzCYP72A4  | (837)  | TAAGAATGGGG-AAAAGTTCTAAGGATGACCTTCTGGGTTTGTTACTAGAC |
| DzCYP72A7  | (743)  | TAAGAATGGGGGAAAGTTCTAAGGATGACCTTCTGGGTTTGTTACTAGAC  |
| DzCYP72A12 | (839)  | TAAGAATGGGGGAAAGTAACAAGAATGACCTTCTGGGTTTGTTACTAGAC  |
| DzCYP72A13 | (839)  | TAAGAATGGGGGAAAGTAGCAAGAATGACCTTCTGGGTTTGTTACTAGAC  |
|            |        | 901 950                                             |
| DzCYP72A1  | (889)  | TCCAATATGAAGGAGGGTGAAGAGCATGGGAAGTCCCAAAATAAAGGGAT  |
| DzCYP72A8  | (889)  | TCCAATATCAAAGAGAGTGAAGAGCATGGGAAGTCCCAAAACAAAGTGAT  |
| DzCYP72A2  | (895)  | TCCAATATGAAGGAGGGTGAAGAGCATGGGAAGTCCCAAAACAAAGGGAT  |
| DzCYP72A9  | (895)  | TCCAATATGAAGGAGGGTGAAGAGCATGGGAAGTCCCAAAACAAAGGGAT  |
| DzCYP72A5  | (892)  | TCCAATATCAAAGAGAGTGAAGAGCATGGGAAGTCCCAAAACAAAGTGAT  |
| DzCYP72A10 | (889)  | TCCAATATGCAGGAGGGTGAAGAGCATGGGAAGTCCCAAGACAAAGGGAT  |
| DzCYP72A3  | (883)  | TCCAATATGCAGGAGGGTGAAGAGCATGGGAAGTCCCAAGACAAAGGGAT  |
| DzCYP72A6  | (832)  | TCCAATATGCAGGAGGGTGAAGAGCATGTGAAGTCCCAAGACAAAGGGAT  |
| DzCYP72A11 | (886)  | TCCAATATGAAGGAGGGTGAAGAGCATGGCAAGACCCAAACAAAGGGAT   |
| DzCYP72A4  | (886)  | TCCAATATGAAGGAGGGTGAAGAGCATGGCAAGTCCCAAAACAAAGGGAT  |
| DzCYP72A7  | (793)  | TCCAATATGAAGGAGGGTGAAGAGCATGGCAAGTCCCAAAACAAAGGGAT  |
| DzCYP72A12 | (889)  | TCCAATATGAAGGAGGGTGAAGAGCATAGGAAGTCCCAAAACAAAGGGAT  |
| DzCYP72A13 | (889)  | TCCAATATGAAGGAGGGTGAAGAGCAGGAGAAGTCCCAAAACAAAGTGAT  |
|            |        | 951 1000                                            |
| DzCYP72A1  | (939)  | GAGCACTGAGGATGTGATTGAAGAGTGCAAGCTGTTCTACTTTGCAGGGC  |
| DzCYP72A8  | (939)  | GAGCACTGAGGATGTGATTGAAGAGTGCAAGCTATTCTACTTTGCAGGGC  |
| DzCYP72A2  | (945)  | GAGCACTGAGGATGTGATTGAAGAGTGCAAGCTGTTCTACTTTGCAGGGC  |
| DzCYP72A9  | (945)  | GAGCACTGAGGATGTGATTGAAGAGTGCAAGCTGTTCTACTTTGCAGGGC  |
| DzCYP72A5  | (942)  | GAGCACTGAGGATGTGATTGAAGAGTGCAAGCTATTCTACTTTGCAGGGC  |
| DzCYP72A10 | (939)  | GAGCACTGAGGATGTGATTGAAGAGTGCAAGCTGTTTACATTGCAGGGC   |
| DzCYP72A3  | (933)  | GAGCACTGAGGATGTGATTGAAGAGTGCAAGCTGTTTACATTGCAGGGC   |
| DzCYP72A6  | (882)  | GAGCACTGAGGATGTGATTGAAGAGTGCAAGCTGTTTACATTGCAGGGC   |
| DzCYP72A11 | (936)  | GAGCACTGAGGAAGTGATTGAAGAGTGCAAGCTGTTCTACTTTGCAGGGC  |
| DzCYP72A4  | (936)  | GAGCACTGAGGAAGTGATTGAAGAGTGCAAGCTGTTCTACTTTGCAGGGC  |
| DzCYP72A7  | (843)  | GAGCACTGAGGAAGTGATTGAAGAGTGCAAGCTGTTCTACTTTGCAGGGC  |
| DzCYP72A12 | (939)  | GAGTACTGAGGATGTGATTGAAGAGTGCAAGCTGTTCTACTTTGCAGGGC  |
| DzCYP72A13 | (939)  | GAGCACTGAGGATGTGATTGAAGAGTGCAAGCTGTTCTACTTTGCAGGGC  |
|            |        | 1001 1050                                           |
| DzCYP72A1  | (989)  | AAGAGACTACA---GAGTTCTACTCACATGGACAATGATTTTATTGAGC   |
| DzCYP72A8  | (989)  | AAGAGACTACA---TCAGTTTCTACTCACATGGACAATGATTTTATTGAGC |
| DzCYP72A2  | (995)  | AAGAGACTACA---GAGTTCTACTCACATGGACAATGATTTTATTGAGC   |
| DzCYP72A9  | (995)  | AAGAGACTACA---GAGTTCTACTCACATGGACAATGATTTTATTGAGC   |
| DzCYP72A5  | (992)  | AAGAGACTACA---TCAGTTTCTACTCACATGGACAATGATTTTATTGAGT |
| DzCYP72A10 | (989)  | AAGAGACTACA---TCAGCTCTACTCACTTGGACAATGATTTTATTGAGC  |
| DzCYP72A3  | (983)  | AAGAGACTACA---TCAGCTCTACTCACTTGGACAATGATTTTATTGAGC  |
| DzCYP72A6  | (932)  | AAGAGACTACA---TCAGCTCTACTCACTTGGACAATGATTTTATTGAGC  |
| DzCYP72A11 | (986)  | AAGAGACTACC---TCAGTTTCTACTCACATGGACAATGATTTTATTGAGC |
| DzCYP72A4  | (986)  | AAGAGACTACC---TCAGTTTCTACTCACATGGACAATGATTTTATTGAGC |
| DzCYP72A7  | (893)  | AAGAGACTACC---TCAGTTTCTACTCACATGGACAATGATTTTATTGAGC |
| DzCYP72A12 | (989)  | AAGAGACTACA---TCAGTTCTACTCACATGGACAATGATTTTATTGAGC  |
| DzCYP72A13 | (989)  | AAGAGACTACA---TCAGTTCTACTCACATGGACAATGATTTTATTGAGC  |
|            |        | 1051 1100                                           |
| DzCYP72A1  | (1036) | ATGTATCCAAACTGGCAGGCTAAGGCAAGAGAAGAGGTACTTCAAGTCTT  |
| DzCYP72A8  | (1036) | ATGTATCCAAACTGGCAGGGTAAGGCAAGAGAAGAGGTACTTCAAGTCTT  |
| DzCYP72A2  | (1042) | ATGTATCCAAACTGGCAGGGTAAGGCAAGAGAAGAGGTACTTCAAGTCTT  |

|            |        |                                                     |
|------------|--------|-----------------------------------------------------|
| DzCYP72A9  | (1042) | ATGTATCCAACTGGCAGGCTAAGGCAAGAGAAGAGGTTACTTCAAGTCTT  |
| DzCYP72A5  | (1039) | ATGTATCCGAAC TGGCAGGCTAAGGCAAGAGAAGAGGTTCTTCAAGTCTT |
| DzCYP72A10 | (1036) | ATGTATCCGAAC TGGCAGGCTAATGCAAGAGAAGAGGTTCTTCAAGTCTT |
| DzCYP72A3  | (1030) | ATGTATCCGAAC TGGCAGGCTAATGCAAGAGAAGAGGTTCTTCAAGTCTT |
| DzCYP72A6  | (979)  | ATGTATCCGAAC TGGCAGGCTAATGCAAGAGAAGAGGTTCTTCAAGTCTT |
| DzCYP72A11 | (1033) | ATGTATCCGAAC TGGCAGGCTAAGGCAAGAGAAGAGGTTCTTCAAGTCTT |
| DzCYP72A4  | (1036) | ATGTATCCGAAC TGGCAGACTAAGGCAAGAGAAGAGGTTCTTAAAGTCTT |
| DzCYP72A7  | (940)  | ATGTATCCGAAC TGGCAGACTAAGGCAAGAGAAGAGGTTCTTAAAGTCTT |
| DzCYP72A12 | (1036) | ATGTATCCAAAT TGGCAGGCTAAGGCAAGAGAAGAGGTTCTTCAAGTCTT |
| DzCYP72A13 | (1036) | ATGTATCCTAAC TGGCAGGCCAAGGCAAGAGAAGAGGTTCTTCAAGTCTT |
|            | 1101   | 1150                                                |
| DzCYP72A1  | (1086) | TGGAAAGAACACACCAGACATGGAGGGATTGAGCCACTTGAAGATTGTGA  |
| DzCYP72A8  | (1086) | TGGAAAGAGCACACCAGATATGGAGGGATTGAACCACTTGAAGATTGTGA  |
| DzCYP72A2  | (1092) | TGGAAAGAGCACACCAGATATGGAGGGATTGAACCACTTGAAGATTGTGA  |
| DzCYP72A9  | (1092) | TGGAAAGAGCACACCAGATATGGAGGGATTGAACCACTTGAAGATTGTGA  |
| DzCYP72A5  | (1089) | TGGAAAGAACACACCAGACATGGAGGGATTGAGCCACTTGAAGATTGTGA  |
| DzCYP72A10 | (1086) | TGGAAAGAGCACACCAGACATAGAGGGATTGAGCCACTTGAAGATTGTGA  |
| DzCYP72A3  | (1080) | TGGAAAGAGCACACCAGACATAGAGGGATTGAGTCACTTGAAGATTGTGA  |
| DzCYP72A6  | (1029) | TGGAAAGAGCACACCAGACATAGAGGGATTGAGTCACTTGAAGATTGTGA  |
| DzCYP72A11 | (1083) | TGGAAAGAACACACCAGACATGGAGGGATTGAGCCACTTGAAGATTGTGA  |
| DzCYP72A4  | (1086) | TGGAAAGAACACACCAGACATGGAGGGATTGAGCCACTTGAAGATTGTGA  |
| DzCYP72A7  | (990)  | TGGAAAGAACACACCAGACATGGAGGGATTGAGCCACTTGAAGATTGTGA  |
| DzCYP72A12 | (1086) | TGGAAAGAGCGCACCAGATATGGAGGGATTGAGCCACTTGAAGATTGTGA  |
| DzCYP72A13 | (1086) | TGGAAAGAGCACACCAGACATGGATGGATTGAGCCGCTTGAAGATTGTGA  |
|            | 1151   | 1200                                                |
| DzCYP72A1  | (1136) | CCATGATTCTATATGAAGTTCTGAGGTTATATCCACCATTGTTTACTA    |
| DzCYP72A8  | (1136) | CCATGATTCTATATGAAGTTCTGAGGTTATATCCACCATTGTTTCTTA    |
| DzCYP72A2  | (1142) | CCATGATTCTATATGAAGTTCTGAGGTTATATCCACCATTGTTTCTTA    |
| DzCYP72A9  | (1142) | CCATGATTCTATATGAAGTTCTGAGGTTATATCCACCATTGTTTCTTA    |
| DzCYP72A5  | (1139) | CCATGATTCTATATGAAGTTCTGAGGTTATATCCACCATTGTTTACTA    |
| DzCYP72A10 | (1136) | CCATGATTCTATATGAAGTTCTCAGGTTATATCCACCAGGGGTTTTCTT   |
| DzCYP72A3  | (1130) | CCATGATTCTATATGAAGTTCTCAGGTTATATCCACCAGGGGTTTTCTT   |
| DzCYP72A6  | (1079) | CCATGATTCTATATGAAGTTCTCAGGTTATATCCACCAGGGGTTTTCTT   |
| DzCYP72A11 | (1133) | CCATGATTCTATATGAAGTTCTTAGGTTATATCCACCAGTGGTTTTCTA   |
| DzCYP72A4  | (1136) | CCATGATTCTATATGAAGTTCTTAGGTTATATCCACCAGTGGTTTTCTA   |
| DzCYP72A7  | (1040) | CCATGATTCTATATGAAGTTCTTAGGTTATATCCACCAGTGGTTTTCTA   |
| DzCYP72A12 | (1136) | CCATGATTCTATATGAAGTTCTAAGGTTATATCCACCAGCGGTTTTCTA   |
| DzCYP72A13 | (1136) | CCATGATTCTGATGAAGTTCTGAGGTTATATCCACCAGGTGACTTTCTA   |
|            | 1201   | 1250                                                |
| DzCYP72A1  | (1186) | AGAAGAAAAACCTACAAAGCAATGGAACTCGGTGGGATTACTTACCCTCC  |
| DzCYP72A8  | (1186) | ACAAGAAAAACCTACAAAGCAATGGAACTCGGTGGGATTACTTACCCTCA  |
| DzCYP72A2  | (1192) | ACAAGAAAAACCTACAAAGCAATGGAACTCGGTGGGATTACTTACCCTCA  |
| DzCYP72A9  | (1192) | ACAAGAAAAACCTACAAAGCAATGGAACTCGGTGGGATTACTTACCCTCA  |
| DzCYP72A5  | (1189) | AGAAGAAAAACCTACAAAGCAATGGAACTCGGTGGGATTACTTACCCTCC  |
| DzCYP72A10 | (1186) | GATAGAAAAACCTACAAAGCAATGGAACCTGGTGGGATTACTTACCCTTC  |
| DzCYP72A3  | (1180) | GATAGAAAAACCTACAAAGCAATGGAACCTGGTGGGATTACTTACCCTTC  |
| DzCYP72A6  | (1129) | GATAGCAAAACCTC CAAAGCAATGGAACCTGGTGGGATTACTTACCCTTC |
| DzCYP72A11 | (1183) | ACAAGAAAAACCTACAAAGCAATGGAACTCGGTGGGATTACTTACCCTCC  |
| DzCYP72A4  | (1186) | ACAAGAAAAACCTACAAAGCAATGGAACTCGGTGGGATTACTTACCCTCC  |
| DzCYP72A7  | (1090) | ACAAGAAAAACCTACAAAGCAATGGAACTCGGTGGGATTACTTACCCTCC  |
| DzCYP72A12 | (1186) | ACAAGAAAAACCTACAAAGCAATGGAACTCGGTGGGATTACTTACCCTCC  |
| DzCYP72A13 | (1186) | ACCAGAAAAACATACAAAGCAATGGAACCTGGTGGGATCAATTACCCTCC  |
|            | 1251   | 1300                                                |
| DzCYP72A1  | (1236) | GGGAGTGATGCTCTCACTGCCTCTACTCTTCATTCACCATGACCCTGCTT  |
| DzCYP72A8  | (1236) | AGGAGTGATACTCTCACTGCCTCTACTCTTCATTCACCATGACCCTGCTT  |
| DzCYP72A2  | (1242) | AGGAGTGATACTCTCACTGCCTCTACTCTTCATTCACCATGACCCTGCTT  |
| DzCYP72A9  | (1242) | AGGAGTGATACTCTCACTGCCTCTACTCTTCATTCACCATGACCCTGCTT  |

|            |        |                                                    |                                            |
|------------|--------|----------------------------------------------------|--------------------------------------------|
| DzCYP72A5  | (1239) | GGGAGTGA                                           | TACTCTCACTGCCTCTACTCTTCATTACCAATGACCCTGCTT |
| DzCYP72A10 | (1236) | AGGAGTGA                                           | TACTCTCACTACCTCTACTCTTCATTACCAATGACCCTACTT |
| DzCYP72A3  | (1230) | AGGAGTGA                                           | TACTCTCACTACCTCTACTCTTCATTACCAATGACCCTACTT |
| DzCYP72A6  | (1179) | AGGAGTGA                                           | TACTCTCACTACCTCTACTCTTCATTACCAATGACCCTACTT |
| DzCYP72A11 | (1233) | AGGAGTGA                                           | TATTCCTATTCCTTTACTCTTCATTACCAATGACCCTACTT  |
| DzCYP72A4  | (1236) | AGGAGTGA                                           | TATTCCTATTCCTTTACTCTTCATTACCAATGACCCTACTT  |
| DzCYP72A7  | (1140) | AGGAGTGA                                           | TATTCCTATTCCTTTACTCTTCATTACCAATGACCCTACTT  |
| DzCYP72A12 | (1236) | AGGAGTGA                                           | TACTCTCACTGCCTCTACTCTTCATTACCAATGACCCTGTTT |
| DzCYP72A13 | (1236) | AGGAGTGT                                           | TACTCAACTGCCTCTACTCTTCATTACCAATGACCCTGAAT  |
|            |        | 1301                                               | 1350                                       |
| DzCYP72A1  | (1286) | TTTGGGGAGAAGACGCCAAAGAGTTT                         | AATCCAGAGAGGTTTTCCGAAGGG                   |
| DzCYP72A8  | (1286) | TTTGGGGAGAAGACGCCAAAGAGTTT                         | AATCCAGAGAGGTTTTCCGAAGGG                   |
| DzCYP72A2  | (1292) | TTTGGGGAGAAGACGCCAAAGAGTTT                         | AATCCAGAGAGGTTTTCCGAAGGG                   |
| DzCYP72A9  | (1292) | TTTGGGGAGAAGACGCCAAAGAGTTT                         | AATCCAGAGAGGTTTTCCGAAGGG                   |
| DzCYP72A5  | (1289) | TTTGGGGAGAAGACGCCAAAGAGTTT                         | AATCCAGAGAGGTTTTCCGAAGGG                   |
| DzCYP72A10 | (1286) | TCTGGGGAGAGGATGCCAAAGAGTT                          | CAATCCAGAGAGGTTTTCCGAAGGG                  |
| DzCYP72A3  | (1280) | TCTGGGGAGAGGATGCCAAAGAGTT                          | CAATCCAGAGAGGTTTTCCGAAGGG                  |
| DzCYP72A6  | (1229) | TCTGGGGAGAGGATGCCAAAGAGTT                          | CAATCCAGAGAGGTTTTCCGAAGGG                  |
| DzCYP72A11 | (1283) | TTTGGGGAGAAGATGCCAAAGAGTT                          | AATCCAGAGAGGTTTTCTGAAGGG                   |
| DzCYP72A4  | (1286) | TTTGGGGAGAAGATGCCAAAGAGTT                          | AATCCAGAGAGGTTTTCCGAAGGG                   |
| DzCYP72A7  | (1190) | TTTGGGGAGAAGATGCCAAAGAGTT                          | AATCCAGAGAGGTTTTCCGAAGGG                   |
| DzCYP72A12 | (1286) | TCTGGGGAGAAGACGCCAAAGAGTT                          | AATCCAGAGAGGTTTTCCGAAGGG                   |
| DzCYP72A13 | (1286) | TCTGGGGAGAAGACGCCAAAGAGTT                          | CAATCCAGAGAGGTTTTCTGAAGGG                  |
|            |        | 1351                                               | 1400                                       |
| DzCYP72A1  | (1336) | ATATCAAAGCATCCAAAGTTCCAGGTGCCTTCTTT                | TCCTTTCCGGTGGAGG                           |
| DzCYP72A8  | (1336) | ATATCAAAGCATCCAAAGTTCCGGGTGCCTTCTTT                | TCCTTTCCGGTGGAGG                           |
| DzCYP72A2  | (1342) | ATATCGAAAGCATCCAAAGTTCCGGGTGCCTTCTTT               | TCCTTTCCGGTGGAGG                           |
| DzCYP72A9  | (1342) | ATATCGAAAGCATCCAAAGTTCCGGGTGCCTTCTTT               | TCCTTTCCGGTGGAGG                           |
| DzCYP72A5  | (1339) | ATATCGAAAGCATCCAAAGTTCCAGGTGCCTTCTTT               | TCCTTTCCGGTGGAGG                           |
| DzCYP72A10 | (1336) | ATATCGAAAGCATCCAAAGTTCCAGGTGCCTTCTTT               | ACCTTTATGGTGTAGG                           |
| DzCYP72A3  | (1330) | ATATCAAAGCATCCAAAGTTCCAGGTGCCTTCTTT                | TCCTTTTGGTGGAGG                            |
| DzCYP72A6  | (1279) | ATATCGAAAGCATCCAAAGTTACAGGTGCCTTCTTT               | TCCTTTTGGTGGAGG                            |
| DzCYP72A11 | (1333) | ATATCGAAAGCATCCAAAGTTCCGGCTGCCTTCTTT               | TCCTTTCCGGTGGAGG                           |
| DzCYP72A4  | (1336) | ATATCGAAAGCATCCAAAGTTCCGGCTGCCTTCTTT               | TCCTTTCCGGTGGAGG                           |
| DzCYP72A7  | (1240) | ATATCGAAAGCATCCAAAGTTCCGGCTGCCTTCTTT               | TCCTTTCCGGTGGAGG                           |
| DzCYP72A12 | (1336) | ATATCGAAAGCATCCAAAGTTCCAGGTGCCTTCTTT               | TCCTTTCCGGTGGAGG                           |
| DzCYP72A13 | (1336) | ATATTGAAAGCATCCAAAGTTCCGGGTGCCTTCTTT               | TCCTTTCCGGTGGAGG                           |
|            |        | 1401                                               | 1450                                       |
| DzCYP72A1  | (1386) | TCCACGCATTTGCATTGGCCAAAGCTTTGCAATGATTGAAGCTAAGATAG |                                            |
| DzCYP72A8  | (1386) | TCCGCGCATTTGCATTGGCCAAAGCTTTGCAATGATTGAAGCTAAGATAG |                                            |
| DzCYP72A2  | (1392) | TCCGCGCATTTGCATTGGCCAAAGCTTTGCAATGATTGAAGCTAAGATAG |                                            |
| DzCYP72A9  | (1392) | TCCGCGCATTTGCATTGGCCAAAGCTTTGCAATGATTGAAGCTAAGATAG |                                            |
| DzCYP72A5  | (1389) | TCCACGCATTTGCATTGGCCAAAGCTTTGCAATGATTGAAGCTAAGATAG |                                            |
| DzCYP72A10 | (1386) | TCCGCGCATTTGCATTGGCCAAAGCTTTGCAATGATTGAAGCTAAGATAG |                                            |
| DzCYP72A3  | (1380) | TCCGCGCATTTGCATTGGCCAAAGCTTTGCAATGATTGAAGCTAAGATAG |                                            |
| DzCYP72A6  | (1329) | TCCGCGCATTTGCATTGGCCAAAGCTTTGCAATGATTGAAGCTAAGATAG |                                            |
| DzCYP72A11 | (1383) | TCCACGCATTTGCATTGGTCAAAACTTTGCAATGATTCAAGCTAAGATAG |                                            |
| DzCYP72A4  | (1386) | TCCACGCATTTGCATTGGTCAAAACTTTGCAATGATTGAAGCTAAGATAG |                                            |
| DzCYP72A7  | (1290) | TCCACGCATTTGCATTGGTCAAAACTTTGCAATGATTGAAGCTAAGATAG |                                            |
| DzCYP72A12 | (1386) | TCCGCGCATTTGCATTGGCCAAAGCTTTGCAATGATTGAAGCTAAGATAG |                                            |
| DzCYP72A13 | (1386) | TCCGCGCATTTGCATTGGCCAAAGCTTTGCAATGATTGAAGCTAAGATAG |                                            |
|            |        | 1451                                               | 1500                                       |
| DzCYP72A1  | (1436) | GAATTTGCATGATTCTTCAGTGT                            | TTCTCCTTTGAGCTTTTCACTTTCC                  |
| DzCYP72A8  | (1436) | GAATTTGCATGATTCTTCAGCG                             | CTTCTCCTTTGAGCTTTTCGCTTTCC                 |
| DzCYP72A2  | (1442) | GAATTTGCATGATTCTTCAGCG                             | CTTCTCCTTTGAGCTTTTAA-----                  |
| DzCYP72A9  | (1442) | GAATTTGCATGATTCTTCAGCG                             | CTTCTCCTTTGAGCTTTTCGCTTTCC                 |
| DzCYP72A5  | (1439) | GAATTTGCATGATTCTTCAGTGT                            | TTCTCCTTTGAGCTTTTCACTTTCC                  |

|            |        |                                                    |           |    |        |     |       |     |        |    |      |      |       |   |                                              |   |    |      |
|------------|--------|----------------------------------------------------|-----------|----|--------|-----|-------|-----|--------|----|------|------|-------|---|----------------------------------------------|---|----|------|
| DzCYP72A10 | (1436) | GAATTG                                             | CATGAT    | TA | ATTCAG | CAC | TTCTC | ATT | TGTGCT | TT | CAC  | ---  | CTTCC |   |                                              |   |    |      |
| DzCYP72A3  | (1430) | GAATTG                                             | CATGAT    | TA | ATTCAG | CAC | TTCTC | ATT | TGTGCT | TT | CAC  | ---  | CTTCC |   |                                              |   |    |      |
| DzCYP72A6  | (1379) | GAATTG                                             | CATGAT    | TA | ATTCAG | CAC | TTCTC | ATT | TGTGCT | TT | CAC  | ---  | CTTCC |   |                                              |   |    |      |
| DzCYP72A11 | (1433) | GAAT                                               | CTGCATGAT | TC | TTTCAG | CAC | TTTTC | CTT | TGTGCT | TT | TCG  | ---  | TTTCC |   |                                              |   |    |      |
| DzCYP72A4  | (1436) | GAATTG                                             | CATGAT    | TC | TTTCAG | CAC | TTTTC | CTT | TGTACT | TT | TCG  | TGCT | TTCC  |   |                                              |   |    |      |
| DzCYP72A7  | (1340) | GAATTG                                             | CATGAT    | TC | TTTCAG | CAC | TTTTC | CTT | TGTACT | TT | TCG  | ---  | TTTCC |   |                                              |   |    |      |
| DzCYP72A12 | (1436) | GAATTG                                             | CATGAT    | TC | TTTCAG | CAC | TTTTC | CTT | TGTGCT | TT | TCG  | ---  | CTTCC |   |                                              |   |    |      |
| DzCYP72A13 | (1436) | GAATT                                              | AGCATGAT  | TC | TTTCAG | CAC | TTTTC | CTT | CGTGCT | TT | TCG  | ---  | CTTCG |   |                                              |   |    |      |
|            |        | 1501                                               |           |    |        |     |       |     |        |    | 1550 |      |       |   |                                              |   |    |      |
| DzCYP72A1  | (1483) | TATATCCATGCACCGCACACTGTTATTACTCTTCAACCACAGCATGGGGC |           |    |        |     |       |     |        |    |      |      |       |   |                                              |   |    |      |
| DzCYP72A8  | (1483) | TATATCCATGCACCGCACACTGTTATTACTCTTCAACCACAGCATGGGGC |           |    |        |     |       |     |        |    |      |      |       |   |                                              |   |    |      |
| DzCYP72A2  | (1483) | -----                                              |           |    |        |     |       |     |        |    |      |      |       |   |                                              |   |    |      |
| DzCYP72A9  | (1489) | TATATCCATGCACCGCACACTGTTATTACTCTTCAACCACAGCATGGGGC |           |    |        |     |       |     |        |    |      |      |       |   |                                              |   |    |      |
| DzCYP72A5  | (1486) | TATATCCATGCACCGCACACTGTTATTACTCTTCAACCACAGCATGGGGC |           |    |        |     |       |     |        |    |      |      |       |   |                                              |   |    |      |
| DzCYP72A10 | (1483) | TATATCCATGCACCGCAC                                 |           |    |        |     |       |     |        |    |      |      |       | T | CTGTTATTACTCTTCAACCACAGCATGGAGC              |   |    |      |
| DzCYP72A3  | (1477) | TATATCCATGCACCGCAC                                 |           |    |        |     |       |     |        |    |      |      |       | T | CTGTTATTACTCTTCAACCACAGCATGGAGC              |   |    |      |
| DzCYP72A6  | (1426) | TATATCCATGCACCGCAC                                 |           |    |        |     |       |     |        |    |      |      |       | T | CTGTTATTACTCTTCAACCACAGCATGGAGC              |   |    |      |
| DzCYP72A11 | (1480) | TATAT                                              |           |    |        |     |       |     |        |    |      |      |       | T | CATGCACCGCACACTGTTATTACTCTTCAACCACAGCATGGAGC |   |    |      |
| DzCYP72A4  | (1486) | TATAT                                              |           |    |        |     |       |     |        |    |      |      |       | T | CATGCACCGCACACTGTTATTACTCTTCAACCAGAGCATGGAGC |   |    |      |
| DzCYP72A7  | (1387) | TATAT                                              |           |    |        |     |       |     |        |    |      |      |       | T | CATGCACCGCACACTGTTATTACTCTTCAACCAGAGCATGGAGC |   |    |      |
| DzCYP72A12 | (1483) | TATATCCATGCACCGCACA                                |           |    |        |     |       |     |        |    |      |      |       | A | TGTTATTACTCTTCAACCACAGCATGGAGC               |   |    |      |
| DzCYP72A13 | (1483) | TATATCCATGCACCGCACACTG                             |           |    |        |     |       |     |        |    |      |      |       | C | TCTTACTCTTCAACCACAGCATGGAGC                  |   |    |      |
|            |        | 1551                                               |           |    |        |     |       |     |        |    | 1575 |      |       |   |                                              |   |    |      |
| DzCYP72A1  | (1533) | TCAACTCATGCTGCAAAAGCTGTGA                          |           |    |        |     |       |     |        |    |      |      |       |   |                                              |   |    |      |
| DzCYP72A8  | (1533) | TCAACTCATGCTGCAAAAGCTGTGA                          |           |    |        |     |       |     |        |    |      |      |       |   |                                              |   |    |      |
| DzCYP72A2  | (1483) | -----                                              |           |    |        |     |       |     |        |    |      |      |       |   |                                              |   |    |      |
| DzCYP72A9  | (1539) | TCAACTCATGCTGCAAAAGCTGTGA                          |           |    |        |     |       |     |        |    |      |      |       |   |                                              |   |    |      |
| DzCYP72A5  | (1536) | TCAACTCATGCTGCAAAAGCTGTGA                          |           |    |        |     |       |     |        |    |      |      |       |   |                                              |   |    |      |
| DzCYP72A10 | (1533) | TCAACTCATGCTGCAAAAGCTGTGA                          |           |    |        |     |       |     |        |    |      |      |       |   |                                              |   |    |      |
| DzCYP72A3  | (1527) | TCAACTCATGCTGCAAAAGCTGTGA                          |           |    |        |     |       |     |        |    |      |      |       |   |                                              |   |    |      |
| DzCYP72A6  | (1476) | TCAACTCATGCTGCAAAAGCTGTGA                          |           |    |        |     |       |     |        |    |      |      |       |   |                                              |   |    |      |
| DzCYP72A11 | (1530) | TCAACTCATGCTGCAAAAG                                |           |    |        |     |       |     |        |    |      |      |       | T | TGTGA                                        |   |    |      |
| DzCYP72A4  | (1536) | TCAACTCATGCTGCAAAAG                                |           |    |        |     |       |     |        |    |      |      |       | T | TGTGA                                        |   |    |      |
| DzCYP72A7  | (1437) | TCAACTCATGCTGCAAAAG                                |           |    |        |     |       |     |        |    |      |      |       | T | TGTGA                                        |   |    |      |
| DzCYP72A12 | (1533) | TCAACTCATGCTGCAAAAGCTGTGA                          |           |    |        |     |       |     |        |    |      |      |       |   |                                              |   |    |      |
| DzCYP72A13 | (1533) | TCAACTCATGCT                                       |           |    |        |     |       |     |        |    |      |      |       | T | CAAAA                                        | A | CT | CTGA |
