# Supplementary material for: The Functional Characterization of DzCYP72A12-4 Related to Diosgenin Biosynthesis and Drought Adaptability in Dioscorea zingiberensis
Source: MDPI journal article supplement (doi:10.3390/ijms24098430), 2023-05-08
Supplement: s1 [file s1]

Table S6. Construction of plant expression vector and specific nucleotide sequences used.

## 1. Construction of plant expression vector

(1) The pUC57 plasmid was chosen as intermediate clone vector, and was digested with XmaI to produce linear vector. *CAMV35S* promoter, *Ubi1* promoter and *NOS* terminator were amplified by PCR using *pCAMBIA* plasmid and *pBI121* plasmid, respectively. Adjacent fragments were added 15bp overlapping ends by PCR amplification. Gibson Assembly® Master Mix – Assembly (E2611) (NEW ENGLAND Biolabs, Beijing) was used to assemble the targeted nucleotides to produce *pUC57-Pub1-Tnos* and *pUC57-Pcamv35s-Tnos*.

(2) Sequence of selected genes (*DzCYP97B1*, *DzCYP90G6*, *DzCYP94N8*, *DzCYP72A12-4*) were amplified by PCR and 15 bp overlapping ends were added to both ends of these genes, respectively. Linear vectors of *pUC57-Pub1-Tnos* or *pUC57-Pcamv35s-Tnos* were prepared by PCR amplification method too. The same strategy as above was used to produce *pUC57-Pub1-DzCYP90B71-Tnos* plasmid, *pUC57-Pcamv35s-DzCYP90G6-Tnos* plasmid, *pUC57-Pcamv35s-DzCYP90N8-Tnos* plasmid and *pUC57-Pcamv35s-DzCYP72A12-4-Tnos* plasmid.

(3) Linear pCAMBIA plasmid was produced by SbfI digestion and nucleotide purification. *Pub1-DzCYP90B71-Tnos* fragment was amplified with 15 bp overlapping ends added. Gibson assembly was used to produce *pCAMBIA-Pub1-DzCYP90B71-Tnos*, named *pCAMBIA-DzCYP90B71*. In the meantime, two restriction endonuclease recognition sites (SbfI & NruI) were added flanking the cassette facilitating multi-cassettes assembly. The *pCAMBIA-DzCYP72A12-4* construct was created in the same way.

(4) Linear *pCAMBIA-DzCYP90B71* was produced by digestion of NruI, and assembled with *Pcamv35s-DzCYP90G6-Tnos* cassette using Gibson Assembly method the same as above to produce *pCAMBIA-Pub1-DzCYP90B71-Tnos-Pcamv35s-DzCYP90G6-Tnos*, named *pCAMBIA -DzCYP90B71/DzCYP90G6*.

(5) Linear *pCAMBIA -DzCYP90B71/DzCYP90G6* was created by digestion of PmeI, and assembled respectively with *Pcamv35s-DzCYP90N8-Tnos* cassette and *Pcamv35s-DzCYP72A12-4-Tnos* cassette to produce *pCAMBIA-DzCYP90B71/DzCYP90G6/DzCYP90N8* and *pCAMBIA-DzCYP90B71/DzCYP90G6/DzCYP72A12-4*.

## 2. Sequences used in expression vector construction.

### >CAMV 35S promoter

Cgacactctcgttactccaagaatatcaagatacagtctcagaagaccaaagggtattgagactttcaacaaagggtaatatcgaggaa  
cctcctcggattccattgcccagctatctgtcacttcacaaaaggacagtagaaaaggaagggtggcacctacaatgccatcattgcgataaa  
ggaaaaggctatcgtcaagatgcctctgccgacagtgggtccaaagatggacccccaccacgaggagcatcgtggaaaaagaagacgttc  
caaccacgtcttcaaagcaagtggattgatgtgataacatgggtggagcacgacactctcgttactccaagaatatcaagatacagtctcaga  
agaccaaagggtattgagactttcaacaaagggtaatatcgggaaacctcctcggattccattgcccagctatctgtcacttcacaaaagga  
cagtagaaaaggaagggtggcacctacaatgccatcattgcgataaaggaaaggctatcgttcaagatgcctctgccgacagtgggtccaaa  
gatggacccccaccacgaggagcatcgtggaaaaagaagacgttcaaccacgtcttcaaagcaagtggattgatgtgatatccactga  
cgtaagggatgacgcacaatcccactatccttcgaagacctctctatataaggaaagttcatttcattggagaggacacgctgaaatcacca  
gtctctctacaaaatctatctct

### >Ubi1 promoter (*Zea Mays*)

ctgcagtgcagcgtgacccggtcgtgccctctctagagataatgagcattgcatgtctaagttataaaaaattaccacatattttttgtcacact  
tgtttgaagtgcagtttatctatctttatacatatatttaaactttactctacgaataataatctatagtagtactacaataatcagtggtttgagaatca

atgtttcctctagctatcatcgtcttgctatttccacactgctgctcctcttcataggagtggccctgggtttgagaagtggagccaatgagagct  
ggaagaagagggggctcaacatccctccaggaagcatgggctggccgctctcggcgagaccatgccttcgggaagctccatccctgca  
cctctctcggcgagtacatggaggatcgtctccagaggtatggaagatctaccgctcgaactgtctggcgcccgacggtggttcggcgg

atgcagagctgaaccggctctgctgatgaacgacgggaagctgttcgagccgagctggccgaagagcgtggcggacatactgggaaaga  
cgtcgatgctggtgctcacaggggagatgcatcgctacatgaagtccttgctccgtaacttcattggggatcgtaggcttcggaatcattcctt  
ggggactctgagcgctatatcttggagaaccttgcgacctgggaaggaggcgcttccttccctgctaagaagaagcttgcgaagataacctca  
atttaattggtgaagaacatactgagatgaatcctggggagccagagaccgagaggttgcgacttctacatgcttcatgaaggagtgat  
agctatgcctctcaattccctggaactgcatacaggaagccattcagctagagctacaatcctgaaaaccattgagcatttgatggaggata  
ggctggagaagaagaaggcaggcactgataatacggagaagctgatcttctaggtttcattctagagcagtcgaacttggatgctgaacaatt  
cggagacttgcgttaggttgccttttgggtggccatgagacctctccactgccatcactctggctatctacttcttgaaggatgccctaaagct  
gtacaagaactaagggaagagcatttgaacctgggtgaggatgaagaagcagagaggagagtcctaaagcactcacttgggaagactacaaa  
tccatggactttgcacagtgtgtggtgagtgagacttaaggctgggaacatcatcaagtttgcacaggaaggctaactgatgtccaatt  
taaaggatatgacataccgagtggtggagtgtgattccggtgttcgccgcagctcatttagatcctactgtctatgacaatcctcagaaattgat  
ccttggagatggcagacaatcctccagcactgctaggattgacaattacatgccattcggtcaggggctgcgcaactgtgctggccttgagc  
tcgcaagatggagatcgccgtgttccctcaccacctgtccttaacttcgactgggagcttgcctgagccagatcacccccctcgctacgccttc  
cctgaattcgaagaaggccttctatcaaaagtgcgaagctatccatcctagaatga

>DzCYP94N8

atggagttcacttggcttctcctctcgtcctcttcatcaccaccaccatcttctcctcctccatctaaaccaactcccacccccaaactcacccc  
tctaaaccttaccatctcctccaaaacctccccacttagtcaaaaactcccaccgtctcctcttcttctgcaccgagctcgtctcctctctccc  
tctccacctccaccctcatcccttctgttcttccctcaacccctcaacgtcgaacacatgctccgctcaacttccccaaactacatcaaaagg  
ctcttccgtcatctccactctgcacgacttctcggcgacggcatcttcaactccaacggctcctcttggcgccctcagcgcaagaccgccagc  
ttcgagttcaacaccaagtcctccgctcttcttccaccacgtccgccacgaatccctccacgctctcctccccattttatgaaacacctcc  
cgtgcatccccctccgtcctcatcgacctccaggacctcctcgaacgcttcgccttcgacaacgtctgctccctcgttctcggccacgaccccc  
gctgcctccacgactccggcgacggcctccgttcttccacgccttccaggagcctcccatctcagcatcgagcggatgaaccacgcctttg  
atctcttttgaaggtaacaagtggctcaacgtcggctctgagcgccgtttaaaccattcgttgttgcgttctgagtagcttccgagattcgt  
gtccttgcgggaagaccaagccgggtgacgacctcctctccgtttcgcgcggatgagaccatctccgatgacctcctgtgcacatcctcattt  
gttctgtcctcgcggccgggacacacccccccgcgcgtctcctgttcttctggtcctctcgtcccgccggacgttctgcggaacatctt  
ggtcgagattcagctatccgagctcgatccggcgaccgtgatggcgatcggttctcagcttgaggagctgagagagatgaactacctcca  
cgccgcgtatccgaggcgatgagacttaccctccgggtgccactcctgccgagatgcgccgccgaggacgacgtctcccggtgggac  
cgtcgtgaagaaggctggaccttgatgtacaacgcctacgccatggggaggtgagagcatttggggcaaggactgcatggagatgag  
gccgggagaggtggctggaggacggcgcttccagccgacgagccccgttccgggtaccgggtgttctcggcgggccgaggatgtgcttggg  
caaggagatggcttcatccagatgaaggcggtggcgccgtcattctcgagaagttcgacatcgacgtcgtcggcgccctccggcgagcct  
cagctctctgtgacgatgacgatgaagggtggttgcagtgaggatcaaaagagagaatccatgtaccaaaagctgtttga

>DzCYP72A12-4

atggagtcagtgtgggagtgatgtggcggtggcgggcggtggtgtagtggcgggcggtggaggacattggattggatttgggtggacac  
cgaggaggctggaccgggagctccggcgaggcgctgcgcggcaaccagtaccgagcttgcacggcgatctcaaggaaaacgtccg  
gctctcgaaggaggctaaatcccgctctgctcttctactgcatgacatgcccccggttctcctctcttccacaacgccatcaaatg  
cacgggtgaaaagtgggccaacacagaaggatcatcaacctgcattccatcttgagaaactaaagctaagtgtccagcattctctacatctt  
gtggtgaactgattagaagatgggagaagatgattcctaataaggtcctcaagaactaaatgttcttccagagctccaagacctcaaaaag  
atgtcatctccaggactgcattcggtagcagttatgaagacggaagaagaatattgaactcctaacagagcaaatcagcttcttattccagcttt  
ccagactgtatacttctggttatcgatttctgccacaccaatgaacaaaagaagcagccaagtgtacaatgagatgaaaagaattcttatag  
gcatgattgagaagagagaaaaggccataagaatgggggaagtagcaagaatgaccttctgggttgttactagactccaatatcaaaag  
agtgaagtgcattgggaagtcccaaaacaaggatgagcactgaggatgtgtgtgaagagtgaagctgttctacttgcagggcaagaga  
ctacatcacttctactacatggacaatgattttattgagcatgtatccaaattggcaggctaaaggcaagagaaggttcttaagcttttgaaa  
gagcgcaccagatatggagggtgagccacttgaagattgtaccatgattctatatgaagttctaaggttatatccaccagcgggtttctaac  
aagaaaaacctcaaaagcaatggaactcgggtgaattacttaccctccaggagtatacttctactgcctctacttcttaccatgacctgt  
ttctggggagaagacgccaagagttaatccagagaggtttccgaagggtatcgaaaagcatcaaaagtccgggtgccttcttcttcttcg

gtggagggtccgcgcatTTgcattggccaaaactttgctctgattgaagctaagataggaatttgcattgattcttcagcacttctcctttgtgctttcg  
ccttcctatatccatgcaccgcacaatgttattactcttcaaccacagcatggagctcaactcatgctgcaaaaagctgtga

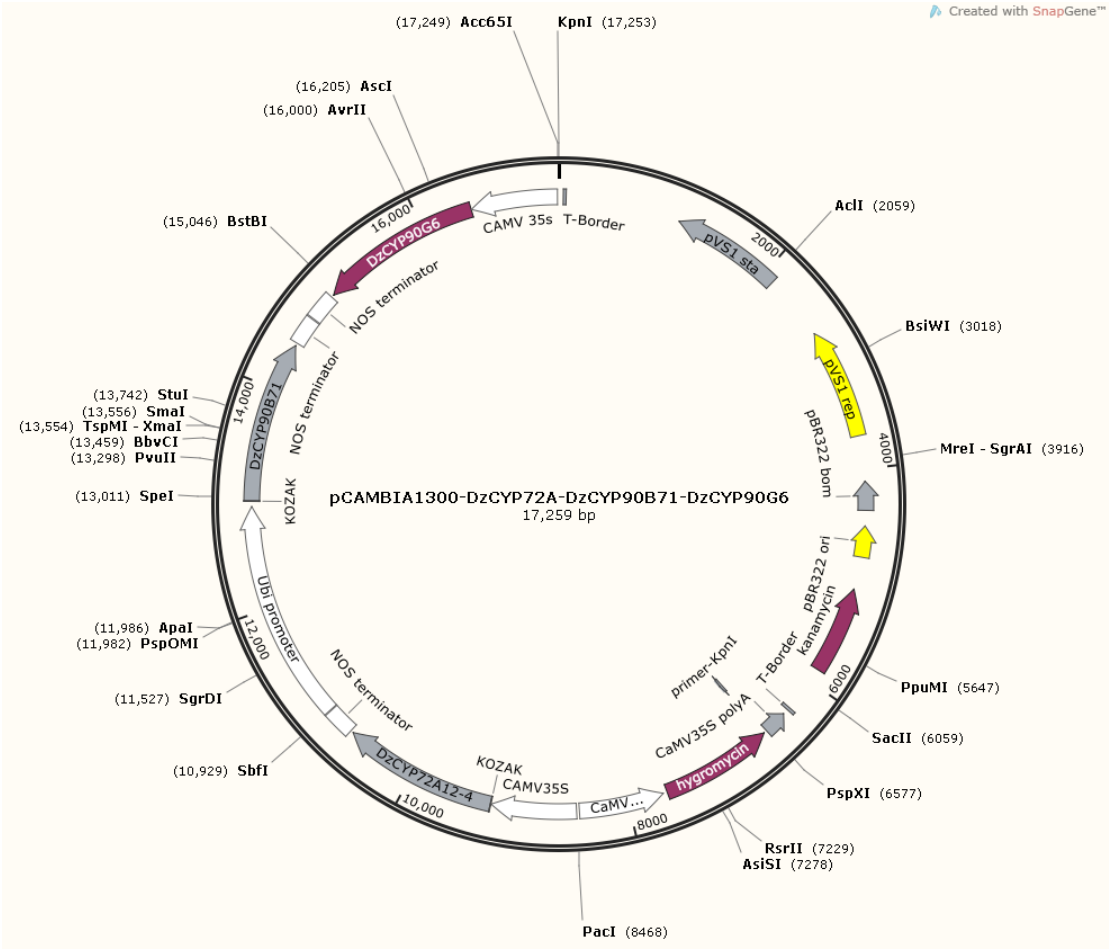

Diagram of pCambia-DzCYP72A12-4/DzCYP90B71/90G6

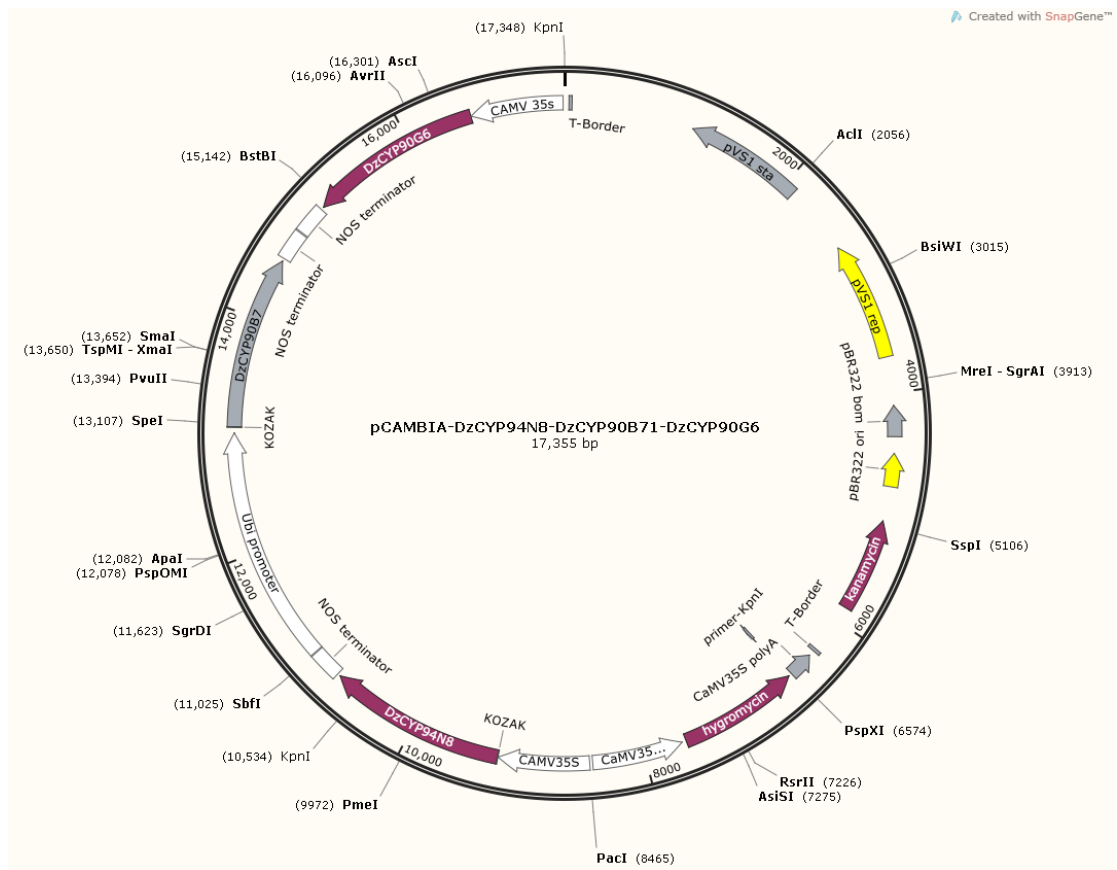

Diagram of pCambia-DzCYP94N8/DzCYP90B71/90G6

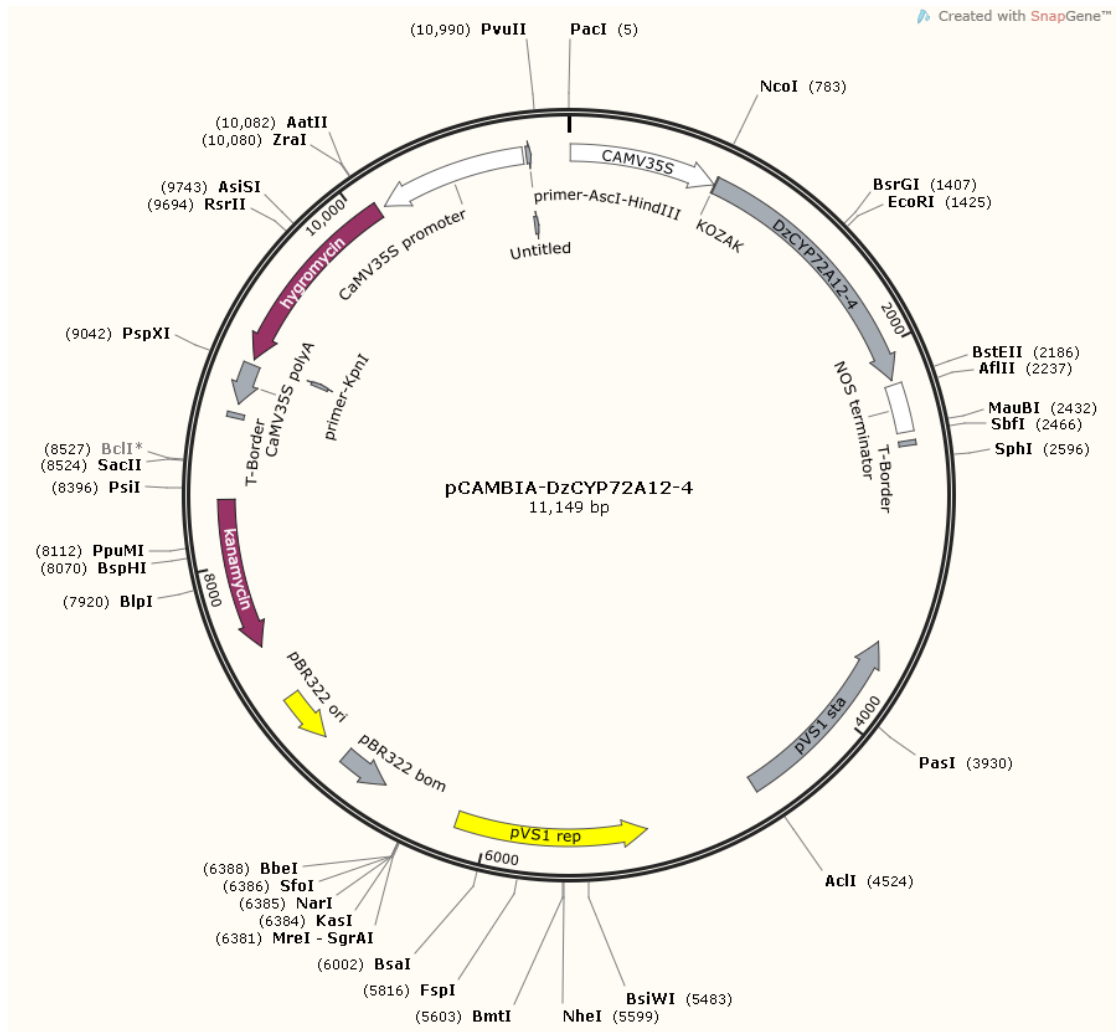

Diagram of pCAMBIA-DzCYP72A12-4

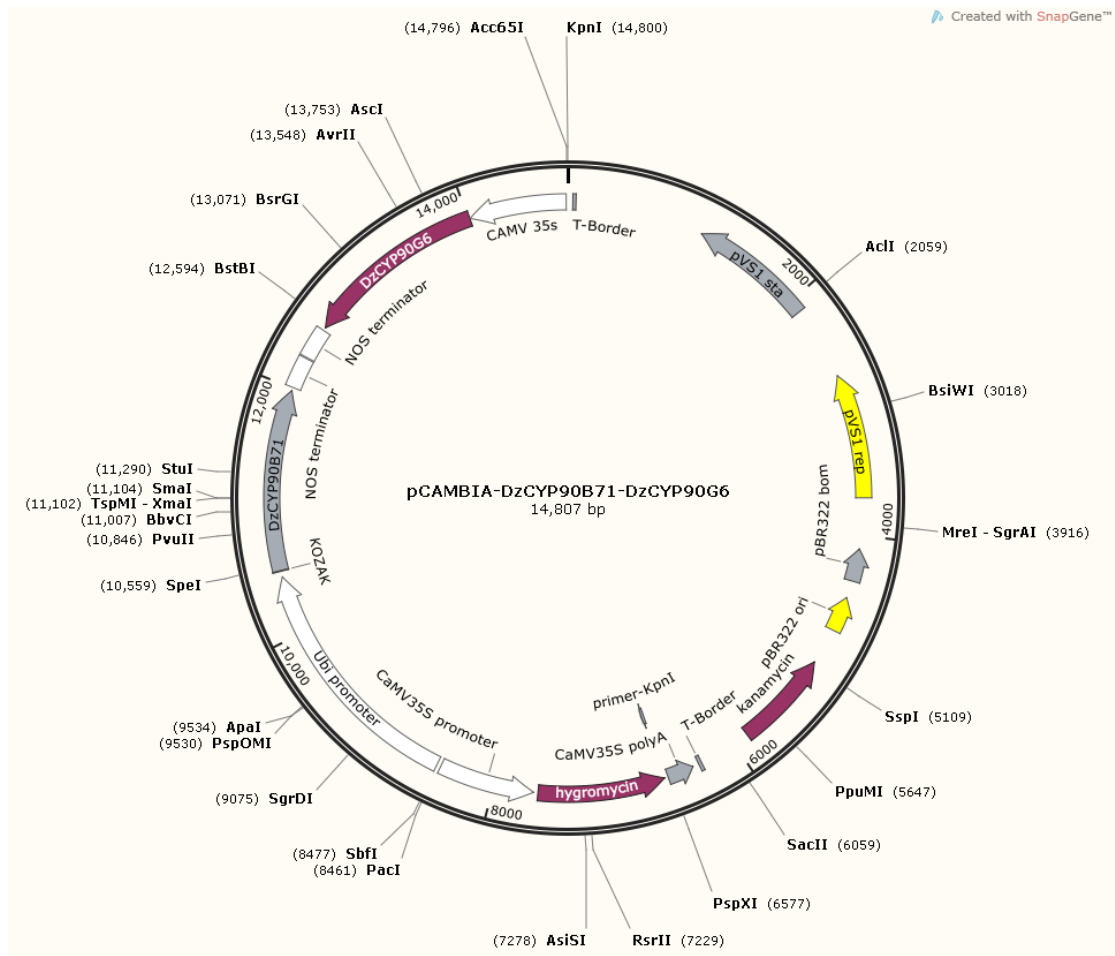

Diagram of pCambia- DzCYP90B71/90G6
