# Supplementary material for: The Functional Characterization of DzCYP72A12-4 Related to Diosgenin Biosynthesis and Drought Adaptability in Dioscorea zingiberensis
Source: MDPI journal article supplement (doi:10.3390/ijms24098430), 2023-05-08
Supplement: s1 [file s1]

**Table S2. Protein sequences used to construct the phylogenetic tree.**

>KAJ0960429.1

MEEMLELLWAWIPLVWLSLVMVMKVLEVFYWRPKRIEKHFSRQGIKGPSYRFFIGNVKEMVSLIFEASSKPMMP CNS  
HNILPRVLSFYHHWKKIYGSTFVLWFGPIARLTVADPDIREIFVSRSEYFERYEAHPLVRQLEGDGLISLRGEKWAHHR  
KVITPTFHMDNLKLLMPLIGKSMVEMVEKWSSVSSSGDFEIDVYDWFHSLTEDAISQTVFGRSYEDGKAVFQLQAQQMLF  
AAEAFYKVLIPGYRLISRRKDDHDEEKADDDGRAKDLLGLMISESRKRFPLRLSGPSSSTIISVQDIMEECKTFFFAGKQ  
TTSSLLTWATVLLAMHSDWQELARQEVLSVCGSSDIPTRDHL SKLKTLMVLYETLRLYPPAVATIRSARADVDLGGYHI  
PRGTELLIPIAHVHDTSLWGSDAAEFNP ARFAGGVALAAKHPAAFIPFGLGARTCIGQNLALLEAKLTVAILLQRFSFR  
LAPSYVHAPTVMMLLYPRYGSPVIFRRLSSNQHNHPST

>KAJ0961056.1

MDDYLLQLQSI AALFLFVFLFNLIQKTFRSKNKEPPQASGGFPVIGHLLLLRGSGRPLYQVLGDMADKHGP AFILRLGS  
RRTLVSNC E VAK ECFTINDKALSSRPANATARHLGYNLAMVGFAPYGSYWRSLRKISTELL SNARLDMLKHVISGEID  
TCLNELSTHCLCNDNNSPVKVDMMKWFGDLNFNIVLQMV TGKRRFFGSGGGSDEAWRFRNAVTKFFHHL SVSPSNMFPWL  
EWM DLGGHV KAMKAVAKEMDSVMVSLLEEHRMRA SGLAAAGDRDFMDVMSHIESDQFKELHDKDTVIKATSLAMLLGG  
TDTTTS LTRVLMNLLKNEEV MKKVQTELDEQVGKDRVVNESDMKKLVYIQAVIKESFRLTPSAELLVPRET MEDCVVAG  
FQVPAGTQVIVNAWKIQRPKVWPDSEFRPERFLESHAAGIDVKGQNYELIPFGTGRRSCPGVSMALHVMNLTLARLIQ  
GFKLSPVGDLTATAAPVGGYSVQVYGFGGYGVQLVKKSDARSVDRES DNHLMLLDEIDVSSVGTVLSRCRCPGEWM  
PMVHHAQNMWYR

>KAJ0961057.1

MEYSLDLLSILGVFAFAFLCHKWIKNLTRTNTNVPQASGALPVIGHLHLLRGPKPVFKLLAD MADKYGPAFTIRLGSV  
RTLILSNWETT KDCFTTNDIVVAARPVNAATEYLGHNYAMFGFAPYGAYWRAVRKITLTDLLSPARLNMLKHVPAAEVD T  
CMKELFQLCNSCDQNP NHVAKVDMKQWFGHLNYNIVVQMVAGKRYFGSGSASEEAWRFRDAATQFFHLLS FVPSDMFPF  
LAWMDIGGYVKAMKKASKEMDDVMDGLVEEHRKRRACGEVNEHPDFIDMLSALEGEKLEGFDWKTVIKTTSLTLILGGT  
DTTSTSLTKVLANLLNHREVLKKVQEEIDEQVGRDRVNESNTKKLVYLQAVIKESFRMTPPDPFLIR RATQKDCILAGY  
HVPKGTQVIVNAWKVHNDPNVWPEPSEFRPERFLLSSQKIDVKGQHYELIPFGTGRRVC PGVTMALQVMNLTARLIQGF  
ELRTPGDVPVEIEGGLVSLASDSPFMVELTPRLSPELY

>KAJ0961255.1(DzCYP72A23)

MESVMGVIWAVAAVVVVAAAWRTL DWIWWTPRRLDRELRRQGLRG NQYRVLHGD LKENVRLSKEAKSRPLPLHCHDIAPR  
VLPLFHNAIKDHGKISITWLG PYPRVTLTEPELVKEVLSNKFGHFVKPTTNPLAKFLIQGLASYEGEKWAKHRR IINPAF  
HLEKLKMLPAFSTSCGELIRRWEKMIPNEGSQELNVFPELQDLTKDVISRTAFGSSYEDGRRIFELLTEQIQLLIPAFQ  
TVYIPGYRFLTPMNRSSQVYNEMKRILIGMIEKREKAIRMGESSKNDLLGLL LDSNIKESEVHGKSQNKGMSTEDVVE  
ECKLFYFAGQETTSLLLTWTMILLSMYPNWQAKAREEVLQVFGKSAPDMEGLSHLKIVTMILYEVLRLYPPAVFLTRKTY  
KAMELGGITYPGVILSLPLFIHHD PVFWGEDAKEFNPERFSEGISKASKVPGAFFPFGGGPRICIGQNFALIEAKIGI  
CMILQHFSFVLSPSYIHAPHNVITLQPQHGAQLMLQKV

>KAJ0961256.1(DzCYP72A24)

MELVMGVIWVTAAVVVVWAWRTL DWVWWTPRRLDRDLRRQGLRG NQYRLLHGD LKENARLSKEATSRPLPLHCHEIAPR  
VAPLIHNAIKDHGKISITWLG PYPRVSLMDPD LVKEVLSNKFGHFVKPRITPIAKFLVQGLVAYEGEKWAKHRR IINPAF  
HLEKLKMLPAFSTSSGELIRRWEKMIPDEGSQELNVSP EIQNTLGDVISRTAFGSSYEEGRRIFELLTEQIHLTPALQ  
TVYIPGYRFLTPMNNRRSQVYNEMKRILKGMIEKREKAIRMGESSKNDLLGLL LDSNMKEGEEQEKSQNKVMSTEDVIE  
ECKLFYFAGQETTSVLLTWTMILLSMYPNWQAKAREEVLQVFGKSTPMDGLSRLKIVTMILYEVLRLYPPVFTLTRKTY  
KAMELGGINYPGVLLQLPLFIHHD PEFWGEDAKEFNPERFSEGILKASKVPGAFFPFGGGPRICIGQS FALIEAKIGI  
SMILQHFSFELSPSYIHAPHTPLTLQPQHGAQLMLQKL

>KAJ0961259.1(DzCYP72A25)

MEYSVAAGVKEMIWGVATALLV VVWVRTLEWLWVKPRRLERELKRQGLRG GKYRLFHGD LKDNARLMKDALS RPLPPYSH

DVAQRVIPLVHQAIKIHGKMSITWLGYPYPRVSLMDPELIREVLSNKGHFVKPNFSPLVKLLAQGLASHEGEKWAKHRRRI  
INPAHFHEKLCMLPAFSTCCDELVKRWQNKMNVEGSIELNMWPELQNLTDGDISRTAFGSCYEEGRRIQFQLQTEQAELI  
IPTAQTVYVPGFRFLPTPKNNRRKAIDREIKTILRSMIEKREKAIRMGGETSCKDDLLGLLESNMKETEQQGRSKNKG  
TTEDVIEECKLFYLAGQETSSLLTWTMVLSSMYPNWQAKAREEVLVQVFGKNKPDMDGVGRLKIVTMILYEVLRLYPPAI  
FLTRRTYKTMELGGITYPPGVLLLLPIILVHHDLDWGEDAKDFKPDRAEGISKASKVPGAFFPFGGPRICIGQSFAL  
IEAKLGLSMILQNFSFELSPSYIHAPYTLVTLQPQHGAPIKLHL

>KAJ0962283.1

MEEELGAWPAVQGAURYVMAFVAVGMSLVMMVKVLELLWWRPRLEEHFARQGIRGPPYKFFLGNVKEMVGYMLEASSK  
PMMPHNSHNILPRVLSFYHHWKKIYGSTFLLWFGPTARLTVADPDIREIFVSRADSFERYESHPLVRQLEGDGLVSLRG  
AKWAHHRKVLTPTFHMDNLKLLIPYIGKTVVDMVDKWLAIPTESGEVIDVSEWFQTVTEDAITRTAFGRSYDDGKAVFQ  
LQGRQMVFAAEAFRKRNTSSWRLDKEIKKDLVGLIERRKARRRRSSDEVEEEKTNDEDVCPKDLLGQMINASTKTPSSDA  
ITDHDIVEECKTFFFAGKQTSSNLLTWTTVLLAMHPEWQDLARQEVLRVCGSRDIIPSRDHLAKLKTGMILNETLRLYP  
PAVATIRRAKADVELGGCKIPRGTELLIPIGVHHDTKLWGPDAARFNPARFGEGARAACHPTAFIPFGLGARMCIGKNL  
ALLEAKLTVAAILQRFSFRLAPSYVHAPTVMMLLYPQYGAPVIFRPLSSPPSITDDSSFQ

>KAJ0962625.1(DzCYP72A16)

MVVVVVVFVSLVIVGLVARVSWWIWWKPKMMEKEMRRQGINGTKYRTFMGDLKDEGEAYKEAWSKPMDLNHNIVPRVLP  
AHLMLQTYGKTSFKWMGTTPAVTIWEPELLREVLNMNCGHFVQPVNPLIKLLANGINSLEGEQWAQRRMKIPAFHIDK  
LKEMVPTFITSCSELIERWKKLLTDETSCELDVWPEFQNLTDIAISRILFGNSFEEGKRIFELQKEQIVLAIDAASSIYV  
PGFRFLPTTKNRRMFIDNEIKRILQDIINNKLKESMKMGGNANSDILSLMLQYGNINIAEKEKNTNNSKITIDNVIEECK  
GFYFAGQDTSSTLLTWTLILLSMHPTWQKAREEVLRTCGKNTPNFESINHLKIVNMILHEVLRLYPPVITQIRHTEKKT  
KLGDITLPAGVHVLIPTLQVHHDQEFWGEDAEFNPFRFSEGVSKASKGQNAFLPFGWGPRMCLGQAFAMIETKLGLAMV  
LQHFSFELSPSYAHAPSIVATLQPQLGAHLILHQL

>KAJ0962630.1(DzCYP72A17)

MLEMQLRRQGLPGNKYRLMMGDMKDEKKSFKAEWSRPMELTHRIAARVIPYDHQMAQTHGKISFKWNGTTPRVNIWNPEM  
SREILLNKSGHIIKPQLNPLIRLLTMGVSTLEGEWAQRRKLINPAFHMEKLKEMVVPFRISCIDLVKRWENLVSAEGSC  
ELDVWPEFQSLTGDVISRTAFGSSFEEGKQIFELQKEQAVLVIEASRSIYLPGRFLPTAKNRRMFIDSEIKRMLRDII  
HKKLDSMKIGENADDDLLSLLQSDTMNVVAEDKNKKNNGITIDDVIEECKLFYFAGQEGTSILLTWTLILLSMYPWQK  
KAREEVLNCGKNTPEFENISHLKIVNMILHEVLRLYPPGVTLIRYINKKVKGVNITLPAGAEVLIPILQVHHDPEIWGE  
DAEEFKPERFSEGVSNASKGQQAFFPFGWGPRICSGQTFAMIEAKLALAMVLQNFSFELSPSYTHAPYNVITLQPQYGAH  
LILHQL

>KAJ0962634.1

MNVATEDKNKKNNGITIDDVIEECKLFYFAGQETTSILLTWTLILLSMYPTWQKKAREEVLRNCGKNTPEFENISHLKIV  
NMILHEVLRLYPPVITLFRHINKNVKLGDITLPAGAEVLIPILQVHHDPEIWGEDAEFEKPERFSEGVSNASKGQNAFFP  
FGWGPRILIGVLGRVSYLVWPKPDAGDAAEKTGVARNKYRLMMGDMKDEKKSFKAEWSRPMELTHRIAARVIPYDHQMA  
QTHGKISFKWNGTTPRVNIWNPEMSREILLNKSGHIIKPQLNPLIRLLTMGVSTLEGEWAQRRKLINPAFHMEKLKEMV  
PAFRISCIDLVKRWENLVSAEGSCELDVWPEFQSLTGDVISRTAFGSSFEEGKQIFEFQKEQAVLVIEAARSYLPGRF  
LPTAKNRRMFIDSEIKRMLRDIIHKKIDSMKIGENTDDDLLSLFICNPIL

>KAJ0962638.1(DzCYP72A20)

MGVLRVLYLVWPKMLEMQLKRQGLPGNKYRLMMGDMKDEKKSFKAEWSRPMELTHRIAARVIPYDHQMAQTHGKIS  
FKWKGTTPRVNIWNPEMLKEILLNKSGHIIKPQVNPLIKLLTMGVSTLEGEWAQRRKLINPAFHMEKLKEMVPAFRISC  
IDLVKRWENLVSAEGSCELDVWPEFQSLTGDVISRTAFGSSFEEGKQIFELQKEQAVLVIEAARSYLPGRFLPTAKN  
RRMFIDSEIKRMLRDIIHKKIDSMKIGENTDDDLLSLLQSDTMNVATEDKNKKNNGITIDDVIEECKLFYFAGQETTSI  
LLTWTLILLSMYPTWQKKAREEVLRNCGKNTPEFENISHLKIVNMILHEVLRLYPPVITLFRHINKNVKLGDITLPAGAE  
VLIPILQVHHDPEIWGRMLKSSKPERFSEGVSNASKGQNAFFPFGWGPRICIGQTFAMIEAKLALAMVLQHFSFDLSPSY

THAPYTVITLQPQYGAHLILHQL

>KAJ0962639.1(DzCYP72A21)

MLEMQLRRQGLPGNKYRLMMGDMKDEKKSFKAEWSRPMELTHRIAARVIPYDHQMAQTHGKISFKWNGTTPRVNIWNPEM  
SREILLNKSGHIIKPQLNPLIRLLTMGVSTLEGEWEAQRRLINPAFHMEKLKEMVPVFRISCIDLVKRWENLVVSAEGS  
CELDVWPEFQSLTGDVISRTAFGSSFEFGKQIFELQKEQAVLVIEAARSIYLPGFRFLPTAKNKRRMFIDSEIKRMLRDI  
IHKKIDSMKIGENTDDDLLSLLQSDTMNVATEDKNKKNNGITIDDVIEECKLFYFAGQETTSILLTWTLILLSMYPTWQ  
KKAREEVLNTFGKNTPEFENISHLKIVNMILHEVLRLYPPVITLFRHINKNVKLGDITLPAGAEVLIPILQVHHDPEIWG  
EDAEFEKPERFSEGVSNASKGQNAFFPFGWGPRICIGQTFAMIEAKLALAMVLQHFSFDLSPSYTHAPYTVITLQPQYGA  
HLILHQL

>KAJ0962640.1(DzCYP72A22)

MLEMQLRRQGLPGNKYRLMMGDMKDEKKSFKAEWSRPMELTHRIAARVIPYDHQMAQTHGKISFKWNGTTPRVNIWNPEM  
SREILLNKSGHIIKPQLNPLIRLLTMGVSTLEGEWEAQRRLINPAFHMEKLKEMVPVFRISCIDLVKRWENLVSAEGSC  
ELDVWPEFQSLTGDVISRTAFGSSFEFGKQIFELQKEQAVLVIEASRSIYLPGFRFLPTAKNKRRMFIDSEIKRMLRDII  
HKKLDSMKIGENADDDLLSLLQSNMTNVAAEDKNKKNNGITIDDVIEECKLFYFAGQEGTSILLTWTLILLSMYPSWQK  
KAREEVLNNCRKNTPEFENISHLKIVNMILHEVLRLYPPGVTLIRYINKVKVGNITLPAGAEVLIPILQVHHDPEIWGE  
DAEEFKPERFSEGVSNASKGQQAFFPFGWGPRICSGQTFAMIEAKLALAMVLQNFSELSPSYTHAPYVMTLQPQYGAH  
LILHQL

>KAJ0962805.1

MDLTTLHFILIFVFPISIIFLFSNISSKQQSQPSNGLLRPYPIVGNLPQLLRHRHRFLDWMTELLSASPTNTISFHVLS  
NVRGIITANPSNVEHILKTNFDNYPKGPRFIHHLQDFLGRGIVNVDGHLWRVQRKTVSFEFNTSRSLRNFVVVNQHEILS  
RLLPLLRKSSRTGAAIDLQDVLERFAFDNICKFAFNEDPVCLSDHDDHVSENNLLSRFAQAFKSAAELSAGRFTYAVPWF  
WIITRLNIGTERQLRESIATVHAFATQIIRSKEKNLHADRADDLLSRFISNEDNTDELRLDIISFTFAGREGTSSA  
LTWFFWLLSRHPEVEHKILQEISAVRAARRQGGGDNSTETFEFEELREMQYLHAAISEAMRLYPPLFVNSTMCQSDVDLP  
DGTLIKKGMFVVFSAZCMGRMESIWGKDCLEFKPERWLDGEGAFRNESPYPYVVFHAGPRMCLGKEMAYIQMKSIAAFVL  
ERFMVDVLHKDKEPERVPSLTLKMKHGLFVGIRDRN

>KAJ0964198.1(DzCYP94N8)

MEFTWLLLLLVLFITTTIFLLHLNPTPTNFTPLKPYILQNLPHLVKNSHRLFFVTELVSSSPSSTSTLIPFVFTSNP  
SNVEHMLRSNFPNYIKGSSVISTLHDLDGIFNSNGPLWRLQRKTASFENNTKSLRSFIFHHVRHESLHALLPILSNTS  
RASLPVLIDLQDLLERFAFDNVC SLVFGHDPRCLHDSADGLRFFHAFQEASHLSIERMNHAFDILLWKVNKWLNVGSERRL  
NHSLLVREYASRFVSLRKTQAGDDLLSRFAADETISDDLVDILICFVLAGRDTTPAALSWFFWLLSSRPDVSRLNIVE  
IQSIRARSGDRDGRFRFSLEELREMNYLHAALSEAMRLYPVPLPRCAAEDDVLDPGTVVKKGWTLMYNAYAMGRMESI  
WGKDCMEMRPERWLEDGVFQPTSPFRYPVFLGGPRMCLGKEMAYIQMKAVAACILEKFDIDVVGASGEPQLSVTMTMKG  
LPVRIKERNPCTKAV

>KAJ0965356.1

MELTSPILVSSIILISTILFLLLLQRRRTTRKQTIDGAPTITFKDLVKNGHRFLDWTTEMLSSPTNTITLPSVATSNP  
SNIEHILKYNFSNYPKGHNITDTHDLLGDGIFNTDGDHWKLQRKIASLQFNNTKSIRSFVTNAVQIEVTTRLLPLAAAA  
VSGEPIDLQDTLERFSFDNVCKVAFDVPARLAGDAMDGGRFARAFDTAAEISTNRFRQPRFFWLLRRKLNLGEERLKE  
AVRTVNEFAMKVVDHKKLKGKAGDDLLSKFIEDDSEHSDEFLRDIISFVLAGRDTTSSALTWFFWLVSRRPEIRRAIR  
DEVSAVRAKHGSEPGQELKLEELREMEYLHAALSETLRLYPPVSLEPRACLADDKLPDGEVKKGWSVMYNSYAMGRMKS  
IWGEDCMEFRPERWLVNGEFQAKSPFKFPIFHAGPRTCLGKEMAYIQMKAVAASVLERWLVNGEFQAKSPFKFPIFHAGP  
RTCLGKEMAYIQMKAVAASVLERFELEMAPGEEKERAHGFTIVLRMNGGLPIVVKNRD

>KAJ0966589.1

MASTIAFSPSLHLPNPPNAHSRLVSTPRSRIRCASSNGRGPPEEPQGVKDVERILQEKRRRAELASRIASGEFTAPQSRLK  
SALGRLGPVGKFLDEMLERLAGGDDAKRLKIPQATGSIGAVGGQAFFIPLYELFTYGGIFRLTFGPKSFLIVSDPAIAK

HILRDNALGYSKGILAEILEFVMGKGLIPANYEVWKVRRKAIVPALHQKYVAKMIGLFGASYSLCEKLDKAASDGEDVE  
MESLFSRLTLDIIGKAVFNDFDSLTHDNGIIEAVYTVLREAEMRSTSPIPTWEIPIWKDISPRQKKANQALKLVNDTLD  
DLIAICKRMVEQEELQFHEEYVNEQDPSILHFLLASGDDVSSKQLRDDMLTLLIAGHETSAAVLTWTFYLLSKEPSIMSK  
LQDEVDVSLGDRLPTLEDMMKKLYTTRVINESLRLYPQPPVLIRSLDDDLGGFPIKSGEDIFISVWNLHRSPKHVWDA  
DCFNPERWPLDGNPNNEINQNSYLPFGGGQQRKCIGDMFATFETVVATAMLVRRFNFQMALGAPPVEMTTGATIHTTEGL  
LMTVTRRTRPPIPKLETFTQIVNVDEPVALGEDQQGEVSAASI

>KAJ0966999.1

MELTLLLLLLAFISLLLLLKRKSSPTTANFTPLRRYPFIGNIPHLLNNSRMLAWASELIPLSPTATSTVAPFVFTANPS  
NVEHIIRSNFDNYRKGGFITAAMHDFLGQGILNSNGDLWHLQRKTASFQLNTKSIRSFIMDIVREAVHSLLPLLHNATT  
TGEVLDLQDLLERFAFDNVCNFAFGYDPKSLDGTSEEGKFFHAFDDATQIVVDRIESIVPWQVKLLNVGSEKRFREAQ  
AIVQEMVSRFVRSTSKQDDLLSRFAEDPNHSEELLRDIGINFMVAGRDTTPSALTWFFWILSSRPHIVEQILNEIKSIKA  
RTNINKNSELFGIEELRELHYLHAALSESMLRYPVPVLLPRLANEDDVLDPGTRVRGGWLVMYSSYVMGRTASIWGDCM  
EVKPERWLVDGVYQPTNPFKYTVFHGGPRACLGREMAIYQMKAVAACILERFEMEVEVVGKRGEPQISMTMRMKGGLPVRI  
ERVLTSLVQEV

>KAJ0967000.1

MHDFLADGIFNSNGELWRLQRKTASFENNTKSIRSFIMDIVREAVHSLLPLLHNATTTGEVLDLQDLLERFAFDNVCNL  
AFGYDPKSLDGTSEEGKFFHAFDDATQIIVDRMVSIWPKVKLLKVRSEKRFREAQAIQEMVSRFVRSTRKQDDLLS  
CFAENPTHSEELLRDIGINFMVAGRDTTPSALTWFFWILSSRPHIVEQILREIKSIRARTNNENEFRIESLREMHYLA  
ALSESMLRYPVPVMLPRMANKDDVLPDGTSVRRGWVVTYSSYAMARLKSIVGEDCMEVKPERWLVDGVYQPTSPFKYPVF  
HGGPRVFLGKEMAIYQMKAVAACILERFELEVVEKRGEPQISVTMRMKGGLPVRIIRERMITTL

>KAJ0967001.1

MELSTLLLLLLLPFVYLLLMRRRSSPLAANFTPLRRYPIIGNIPHLLKNRSRMLDWASELIPLSPTATSTVAPFVFTAN  
PSNVEHVIRANFDNYPKGGFITSSMHDFFGDGIFNSNGELWRLQRKTASFENNTKSIRSFIMDIVREAVHSLLPLLHNA  
TTTGEVLDLQDLLERFAFDNVCNLAFGYDPKSLDGTSEEGKFFHAFDDATHIVVHRTHSLIPWQIKLLNVGSEKFRD  
SQAIVQEMVSRFVKSTHKQDDLLSRFAEDPTHSEELLRDISINFMVAGRDTTPSALTWFFWILSSRPHIAEQILREIKSI  
RARTNNDNDNEFFRIEELREMHYLAALSESMLRYPVPVLLPRLANEDDVLDPGTSVRRGWVFMVYSSYSMARSKSIWGED  
CMEVKPERWLVDGVYQPTSPFKYPVFHGGPRVCLGKEMAIYQMKAVAACVLERFELEVVEKRGEPQLSMTMRMKGGLPVRI  
IRERIITTL

>KAJ0967143.1

MSFSSSLLPSLLPLFPSSSPKCHSLHPRSSILVPRAYSGPDKPPPTTTNGSWVSPDWLTSFARFSFSPDSSSIPIADA  
RLDDVSDLLGGALFLPLFKWMKENGVPYRLAAGPRNFVIVSDPAIAKHILRNYNNAKGLVSEVSQFLFGSGFAVAEGSH  
WMVRRKAVAPSLHKKFLSVMVDKVFCRCALRLVEKLEPYTLSGDAVNMEQKFSQLTLDVIGLSLFNYNFDSLTTDSPVID  
AVYTALKETEARSTDILPYWQIDFLCKIVPRQIKAERAVSHIRKTVEELITCKKELVEAEQEVDGEDYVNDADPSILRF  
LLASREEVTSVQLRDDLLSMLVAGHETTGSVLTWTLYLLSKDSSALFRAQQEVDVSLQGRLPYDDVKELKYLTRCIYES  
MRLYPHPPVLIRRAQAADVLPGNYKVNAGQDIMISVYNIIHSPQVWDRAEEFVPERFDLEGAPNEANTDFRIFPGGGP  
RKCVDGQFAMLEAIIALAIFLQHMFELVADQKIGMTTGATIHTTNGLYMTLRQRKLQNDLAHLEDQDVNLQPSLSKD

>KAJ0967765.1(DzCYP90G6)

MFPLAIIVLLFPTLLLLFIGVALGLRSGANESWKKRGLNIPPGSMGWPLLGETIAFRKLHPCTSLGEYMEDRLQRYGKIY  
RSNLFGAPTIVVSADAELNRFVLMNDGKLFEPSPKSVADILGKTSMLVLTGEMHRYMKSLSVNFMGIARLRNHFLGDSER  
YILENLATWKEGVFPFAKEEACKITFNLMVKNILSMNPGEPIETERLRILYMSFMKGVIAMPLNFPGTAYRKAIQSRATIL  
KTIEHLMEDRLEKKKAGTDNIGEADLLGFILEQSNLDAEQGDLLGLLFGGHETSSTAITLAIYFLEGCPKAVQELREE  
HLNLVRMCKQRGESKALTWEDYKSMDFAQCQVSETLRLGNIKFVHRKANTDVQFKGYDIPSGWSVIPVFAAAHLDPTVY  
DNPQKQFDPWRWQTISSTARIDNYPFGQGLRNCAGLELAKMEIAVFLHHLVLNFDWELAEPDHPLAYAFPEFEKGLPIK  
VRKLSILE

>KAJ0967766.1

MGLMGPLLLTLAALAVTVFLLRRRRQPSSKTSKPLASSGTLSELMKNGHRILDWTELLSSSQGTGTVTTFMGVVTANPSN  
VEHILKSHFPNYPKGSHSTTILSDFLGAGIFNSDGEHWRLQRKTASLEFTTKSIRSFVSSNVRLTSSRLLPVLSHFARS  
GQIVDLQDLFDCLAFDNVCQVTFGYDPARLDSSGDPDSVAFSRAFDRTALSRRFSHPFPFTWKLLRFLNAGYERELKA  
EVAKVHRFAMQVVRRRKKDGDLDGDDLSRFIAEADYSDEFLRDIISFVLAGRDTTSATLTWFFWLIASRPEVKARVLDE  
IRAAREQERERTGTATSEAVLTLDQVRGMDYLHAALSETRLYPVPVPLQTRACAEDDLLPDGTPVKKGSTVMYSAYAMGR  
SESIWGEDWKEFRPERWLENGVFRPASSFRFPVFHAGPRMCLGKDMAYIQMKAVAAVMERFELEVVDDEKPREPEFTMI  
LRMKGGLPVRIREKEF

>KAJ0967767.1(DzCYP90B71)

MAPMELLLIVSPLVLALIIFFSFRGTSKGGDKAEKIPPGTMGWPLIGHTIPFMQPHSSASLGLFVDQNIAKHGRIFRMNL  
LGKPTIVSADADFNRFILQSEGRMFENSCTPSIAEIMGRWSMLALAGDVHREMRSAVNFMSNVKLRTYFLPDVEQQAIIK  
ILSAWRHGSTFSAQEKGKFAFNLMVKHLSMMDPGMPETEQLRKEYITFMKGMAIPLNPGTAYRKALQSRSIILKIMG  
QKLDERVEKVKRGCEGLEEDDLLASVAAQSNITRDQILDILSMLFAGHETSSAAICLAIYFLESSPKALQQLREEHINI  
AKMKKEKGETGLTWDDYKQMEFTHCVINETLRLGNIVKFLHRKAIKDVQYKGYDIPCGWEVVPPISSAHLDPSPYDDPQS  
YNPWRWQTISTATSKNNNIMSFSGGPRLCPGAELAKMEMAVFLHHLVQKFNWELAEHDYPVSFPFLGFPKHLPIKVHAID  
HKASA

>KAJ0974988.1(DzCYP72A15)

MEPSFISMAATLSSLLLYCALTVVHVWWRPRMIEKQLKKQGIKGRPYKVLRGDLSDIVKIMKEALSKPMELHHHISPR  
ALPFVHSTVEQFGKLSIIWYGKNPRIIQDVELIKEVLANKNGNFKPLLNPLQRLLAEGVSLVEGDKWVQHRNILNPAF  
HLAKLKGMPAFCTSCSEMISKWEMLFGPEGSCELDVWIELKALTADVISRTAFGSNYREGQKVFEFQEQEIQLMMEASW  
IPYIPGFRFLPTKKNRRRYLDNEIKAIIRSLIHKKEKSMEVGESGGEDLLSLLQSNHNVHENAANGLKLEGLTIDEVI  
EECKLFYFAGHDTTSSLLTWTLILLSMYPAWQTRAREEVHRICGKNMPDYESIGQFKIVTMILHEVLRLYPPVTGQYRHV  
YHETKLGELSLPAGVDLFPVPSLLVYHDPEIWGEDCKEFNPQRFSEGVLKATKNQFVYFPFGFGQRTICIGNFAMIEAKIA  
LAMMLQHFSFDLSPSYAHCPYSLITLQPQHGAQLIVHRL

>KAJ0975913.1

MLLSALSKLPSPINGGFLGFHSVVLDSVTQTPLASPLTLTKRSRFRQCSTGTEETKTKRNLLDNASNLLTNLSSGGNLG  
SMPVAEGAVSDFGRPLFFSLYDWFLEHGSVYKLAFGPKAFVVVSDPIVARHVLRENTFSYDKGVLAIELEPIMGKGLIP  
ADLDTWKLRRKVVIPGFHSSFLEAMVSVFTNCERTMLKFEELIEREKPGEKTIELDLEAEFSSLALDIIGLGVFNVDYFG  
SVTKESPVIKAVYGTLEAEHRSTFYIPYWNLPFARWIVPRQRKFHNDLKIINDCLDDLIKNAKKTRQETDVEKLQQRDY  
SSLKDASLLRFFVDMRGVDVDDRQLRDDLMTMLIAGHETTAAVLTWAVFLLAQNP SKMRKAQAEIDSVLGQGKTTLLECIIK  
KLEYIRLIIAEALRYPQPLLIRRALRPDVLPGGYKGLDVGYEIPAGTDIFISVYNLHRSPYFWRPNDFEPERFLVPK  
KSEGIQGWAGFDPGRSPGAMYNEIADFAFLPFGGGRPKCVGDQFALLESTVALAMLLQRFDELGRSADEVELVTGAT  
IHTKKGLWCRLKKRTSKTHSNPNPTQTKGV

>KAJ0977987.1

MELILISLMIPLSILIFLLPSNGGNSHTLRYPYVIGNLLQFLRHRHRFLDWMTDLLTASPTNTITFRLGTSGIVTAN  
PANVEHLLKTNFHAFPKGPRSAHLHDFLGLGIFNVGDWLRLQRKTASFENTRSLRTFVLNRNVHHETLTRLLPLLRII  
ATECSAVDIQDLLERFAFDNVCKVAFNEDPACLSEAAENVRLSTEFASFRDAAELSSGRFRYALPFWWMLKRLNLGSL  
ERRLKESIATVHEFAERIIRLRKEKKSGDDLSRFMAEGKNTDELLRDIVISFILAGRDTTSSALTWFFWLLSSNPDVE  
QRILQEIREVRARRGLDIKTEAFDLEELREMHYIHAAISEAMRLYPVPVNTFMCSEDHVLPDGSSIKKGWFITYNAYA  
MGRMEGIWQGEQREFKPERWLAADGTRFPESPYRPAFHAGPRMCLGKEMAYIQMKSIIACVLERFVVEVVDKDRKPEKT  
LALTLRMKGGLLVTLRERCTAGVA

>KAJ0978714.1

MVLGALLVILATKFWQALFDLIWRPYIITKRFEKQGVGRPPYKFRMGAKQEMKDIQKGAETLVLDSSRSHDIACKVLPHYQ  
AWSSQYGTTFLYWMGTQPRICLDPEMVKQVLSSKFGFYAKTYPGANIMAIMGKGLAFIEGSDWARHRRVINPAFHIDKL

DMMAKTMAECLVHTLSEWEKQGNNDKTEIEVSRQFEELTCNIISHTVFGTSDSINGKKIFEAQKELFLITLADFDGSMR  
YLPTKKNLKKWKLEKRMKNALTSIINSRLDNSKELGYGDDLLGLMLHSSFPVNGNSSLSIDEIIDECKTFYFGGHETTS  
QLLTWTMFLSTNPEWQERLREEVLKECGTETPNTDMLSKLKLVTMVLWESLRLYPPAILLARDASKEMNLGGLMIPKGT  
GLMIPMLMLHRDKEHWGEDANEFNPLRFENGASRAARHPNSILPFSIGPRACLGQNFAMLEARLVFAMMLQRSHDIACKV  
LPHYQAWSSQYGTTFLYWMETKPRICLGDPEMVKQVLSSKFGFYAKPYPGANLMAMMGKGLVFTEGSDWARHRRVINPAF  
HIDKLKMMAKSMADCVLNTLSEWEKQGNNDKTEIEMSRQFQELTGNIIISHAIFGTSDSINGKEIFEAQNELFLITIADL  
NGSMRYLPTKKNLKKWKLEKRMKNLTLSIIKNRLDNSKELGYGDDLLGLMLHSSYSVNDNNSGLSIDEIIDECKTFYFAG  
HETTSLLTWTMFLSTNPEWQERLREEVLKECGTETPNTDMLSKLKLVTMVLWESLRLYPPVILIARDASKDMNLAGLV  
IPKGTGLMIPMLLQRDKEYWGEDANEFNPLRFENGASRAAMHPNSIVPFSIGPRACVGQNFAMLEARLVAMILQRFSF  
SLSPKYKHSPANWLTLPQFGLPIDLRPLHQ

>KAJ0978746.1

MVLGALLVILATKLWQALFDLIWRPYIITKRFKQGVGRPPYKFRMGAKQEMKDIQKGAETLVLDSRSHDIACKVLPHYQ  
AWSSQYGTTFLYWMGTQPRICLGDPEMVKQVLSSKFGFYAKTYPGANIMAIMGKGLAFIEGSDWARHWRVINPAFHIDKL  
NMMAKTMAECLVHTLSEWEKQGNNDKTEIEVSRQFEELTCNIISHSVFGTSDSINGKKIFEAQKELFLITIADFNNGSMR  
YLPTKKNLKKWKLEKRMKNALTSIINSRLDNSKELGYGDDLLGLMLHSSFPVNDNNSGLSIDEIIDECKTFYFGGHETTS  
QLLTWTMFLSTNPEWQERLREEVLKECGTETPNTDMLSKLKLVTMVLWESLRLYPPAILLARDASKDMNLGGLMIPKGT  
GLMIPMLLQRDKEHWGEDANEFNPLRFENGASRAARHPNSILPFSIGPRACLGQNFAMLEARLVFAMMLQRFSFSLSPK  
YKHSPVNWLTLPQFGLPIDLRPLHQ

>KAJ0978747.1

MGYQLGMVLGALLVILATKLWQALFDLIWRPYIIIKRFKQGVGRPPYKFRLGAKQEIQDIQKAAETLVLDSRSHDIACK  
VLPHYQAWSSHYGTTFLYWMETKPRICLGDPEMVKQVLSSKFGFYAKPYPGANLMAMMGKGLVFTEGSDWARHRRVINPA  
FHIDKLKMMAKSMADCVLNTLSEWEKQGNNDKTEIEMSRQFQELTGNIIISHAIFGTSDSINGKEIFEAQNELFLITIAD  
LRGSMRYLPTKKNLKKWKLEKRMKNLTLSIIKNRLDNSKELGYGDDLLGLMLHSSYSVNDNNSGLSIDEIIDECKTFYFA  
GHETTSHLLTWTMFLSTNPEWQDRLREEVLKECGTETPNTDMLSKLKLVTMVLWESLRLYPPVILIARDASKDMNLGGL  
MIPKGTGLMIPMLLQRDKEYWGEDANEFNPLRFENGASRAAMHPNSILPFSIGPRACVGQNFAMLEARLVAMILQRFS  
FSLSPKYKHSPANRLTLPQFGLPIDLRPLHQ

>KAJ0978942.1

MDHLSLPSILILFSLSHFFSVSTQKKQSQPSNGLRPYIVGDLPPQFLRHRHRFLDWMTTELLAASPTNTISFRRLGNV  
RGVITANPSNVEHILKSNFENYPKGPRFIHHLQDFLGRGIFNVGDHLWRVQRKTASFEFNTRSLRNFVVVNVQHEILSRL  
LPLLRSKSRGTGAIDLQDVLERFAFDNVCKVAFNEDPACLSDVSEKPLNLSSRFAQAFKRAAELSAGRFRYAIPRFWIIT  
RLLNIGSERELRESIATVHGATQIIRSRRKEKLRSDDLLSRFISNEDNSDEFRLDIVISFILAGRDTTSSALTWFFWLL  
SRHPEVEHKILQEISSVRAARQLGDNTETFEFELRQMQLYHAAISEAMRLYPPVSVNSTMCQSDDTLPDGTLKKGMFM  
SYNAYSMMGRMESIWGKDCVEFKPERWLDGEGAFRPNPYRYPVFHAGPRMCLGKEMAYIQMKSIAACVLERFMVDVLHKD  
KAPEQMLSLTRMKHGLSVRIRDN

>KAJ0980322.1

MEYSFLDLLSILGVFAFAFLCHKWIKNLTRTNTNVPQASGALPVIGHLHLLRGPKPVFKLLSDMADKYGPAFTIRLGVS  
RTLILSNWETTDCFTTNDIVVAARPVNAATEYLGHNYAMFGFAPYGAYWRSVRKITLTDLLSPARLNMLKHVPAAEVD  
CMKELFTLCNSCDQPNPHVAKVDMKQWFGHLNYNIVQMVAGKRYFGSGSASEEAWRFRDAATQFFHLLSFVPSDMFPF  
LAWMDIGGYVKAMKKASKEMDDVMDGLVEEHRKRRACGEVNEHPDFIDLMSALEGEKLEGFDWKTVIKTTSLTLILGGT  
DTTSTSLTKVLANLLNHREVLKKVQEELDEQVGRDRVNESDTKKLVYLQAVIKESFRMTPDPFLIRATQKDCILAGY  
HVPKGTQVLVNAWKVHNDPNVWPEPSEFRPERFLSSQKGIDVKQHYELIPFGTGRRVCPGVTMALQVMNLTARLIQGF  
ELRTPGDVPVEIEGGLVSLASDSPFMVELTPRLSPELY

>KAJ0981901.1

MSLLGKPTIVSADADFNRILQSEGKMFENSCTPSIAEILGRWSMLALEGEIHRMRSIAVNFMGNVKLRNYFLPDIEQQ

ALKILHSWKDGSTFSAHEEGKKFAFNLMVKHLMSMDPGMPETVKLRKEYITFMKGMAIPLNLPYTAYRKALQSRSAILK  
IMGKRLDERVQKIREGSHELEEDDLLASVSTQSNLTRDQILDILSLLFAGHETSSAAISLAIYFLESSPKALQQLREEH  
VNIVKMKGESGLTWEDYQMEFTHCVINETLRLGNIVKFLHRKVIKDVQYKGYDIPCGWELVPIISAAHLDPITYDDPQT  
YNPWRWQTISTATSKNNNLMFSFGGPRLCPGAELAKLEMAVFLHHLVQKFNWELAEHDYPVSPFPLGFPKNLPKIVHAIK  
KLT

>KAJ0981902.1(42)

METLTLSIAAVLLLLLASILWRLRHVQGSKTKNRSGSLFELMKNSHRILDWTTELLHDSPSGTTVTFMGVSIISNPSNVEH  
ILKNRFENYPKSGSFTSVLSDFLGSGIFNADGEHWRLQRKTASLEFSTKAIRAFIHSRVRLESVSRLIPLLSSAARSGEQ  
LNLQDLLEFFTFDNACQVTFGHDPSSLSSPNDDPLSSDRQFAKAFEEAAQLSVRRFSHPFPFIWKLQRFLNVGSEGRLK  
EEVAKVQAFAMDVVQERKRKRDRGTGSLGDDLLSRFIADNDYSDEFRLDIVISFVLAGRDTAAAISWFFWLISTRPAVTD  
LIVDEIRSVRAKCGKTMEQEPVFSLDQVRGMDYLHAALAESRLYPVPLQTRTCLEDDLLPDGTPVRKGQTVMYSSYAM  
GRTERIWQQDWGEFRPERWLEKGVFRAVSPFTYPVFHAGPRMCLGKEMAHIQMKAVAAALLERFEIEVDEAKEREKDLG  
MMLRIKGGLPVRIRERMFLN

>KAJ0981907.1

MSPHMELLLLLSPVLLSIFFLSNLIKWRRRRRKLPPGGSGWPFIGETFAYLKP HKATSIGHF MKQHMYTRYGKIYRSNLF  
EPTIVSADPGLNRFLQNEGRLFECSPKSGIGILGKWSMLVLVGD MHRDRMISL NFMSSGRLRLHLLPEVERHTLLVL  
RAWKEGSSFSQAQEEAKKFTFNLMAKNIMSMDPGEPETEKLRLEYITFMKGVSAPLNFPGTPYWKALKSRSSILSVIERK  
MDKRLKLKRDGDDTLEVDLLSWALKQSNLSKEQILDLLSLLFAGHETSSMALALAIFFLEACP KAVEELRVEHVEISR  
KKKL RGEIGLNWDDYQMEFSQC VINETLRLGNVNVFVHRKALKDVHYKGYEIPSGWKVLPVFAAVHLDPSLYSDPQEFN  
PWRWQKSSSNTNFMFYPGGPRLCAGSELAKLEMAVFLHHLVLNYQWTLDEPDCPLAYPYIDFPKGLPIKVQRIT

>KAJ0982068.1

MSMGDLFFSIINVSILLILILIKHYRNPNPNPPSPPLVGHHLHLLKRQPLYRTLARLS DLYGPILLRFGSRR  
VLLVSSSSGAGECFTVNDIAFANRPAFLFGKHLGYNYSTLSWSPYGP HWRNLRRATIEVLSTLRLSSSHLRSDEVRCL  
VKALLRDYAGPGFH LAEMKTKFFGLTYNVVMRMLANKKYYGEETEGSSEAGNEFRDIVKETFLIAGASNPA DFPVPMRWL  
GIGGHERRLKSLSRRRDNFFQALVNEHRDRKESGSQDGESSPAGRSTVIDLLLSMQEGDSEYYTDDVIKG FIAQMLVAGT  
DTSAITMEWAMSLNNPQALKKLRLVELDANISQGSMLQEVLDLPKLPYLHSVINETLRMY PAGPLLVPHESSQDCTVGGF  
HVPSGTILLVNAWKIQRDP ELPWDEPKFKPERFLKEDVNEVFKMMPFGLGRRRCPEGELAMRVVALVVGTLVQC FEWEKV  
GDEDVDMSEGTLTLPKAKPLVAMYKPREDMAAGLLSQL

>KAJ0985657.1

MEEMLELLWAWIWPLVWLSLSLVMVMKVLEV FYWRPKRIEKHFSRQGIKGPSYRFFIGNVKEMVSLIFEASSKPMMP CNS  
HNILPRVLSFYHHWKKIYGSTFVLWFGPIARLTVADPD LIREIFVSRSEYFERYEAHPLVRQLEGDGLISLRGEKWAHHR  
KVITPTFHMDNLKLLMPLIGKSMVEMVEKWSSVSSSGDFEIDVYDWFHSLTEDAISQTVFGRNYEDGKAVFQLQAQQMLF  
AAEAFYKVLPYGYRLPTRKNTISWKLEKEIRRKLVRLISRRKDDHDDEEKADDDGRAKDLLGLMISESRKRFPRLSGP  
SSTIISVQDIMQECKTFFFAGKQTTSSLLTWATVLLAMHSDWQELARQEVLSVCGSSDIPTRDHL SKLKTLMVLYETLR  
LYPPAVATIRSARADV DLGGYHIPRGTELLIPIAVHHD TSLWGSDAAEFNPARFAGGVALAAKH PAAFIPIFGLGARTCI  
GQNLALLEAKLTVAILLQRF SFRLAPSYVHAPT VMLLLYPRYGSPIFRRLSSNQHNHPST

>KAJ0985668.1

MEEMLELLWAWIWPLVWLSLSLVMVMKVLEV FYWRPKRIEKHFSRQGIKGPSYRFFIGNVKEMVSLIFEASSKPMMP CNS  
HNILPRVLSFYHHWKKIYGSTFVLWFGPIARLTVADPD LIREIFVSRSEYFERYEAHPLVRQLEGDGLISLRGEKWAHHR  
KVITPTFHMDNLKLLMPLIGKSMVEMVEKWSSVSSSGDFEIDVYDWFHSLTEDAISQTVFGRSYEDGKAVFQLQAQQMLF  
AAEAFYKVLPYGYRLPTRKNTISWKLEKEIRRKLVRLISRRKDDHDDEEKADDDGRAKDLLGLMISESRKRFPRLSGP  
SSTIISVQDIMEECKTFFFAGKQTTSSLLTWATVLLAMHCDWQV LARQEVLSVCGSSDIPTRDHL SKLKTLMVLYETLR  
LYPPAVATIRSARADV DLGGYHIPRGTELLIPIAVHHD TSLWGSDAAEFNPARFAGGVALAAKH PAAFIPIFGLGARTCI  
GQNLALLEAKLTVAILLQRFVPAG AQLRPRAHRPHAPLPSIRFAGHL PPLVVKPTQSPFHVTAEMPSQSTLYFALLVFL

FFKKI

>KAJ0985924.1(DzCYP72A1)

MESVMGVVWAAA VAVAWAWRTLDWVWWKPRRLDRELRRQGLRGNQYRLLHGDLENARLSEKAKSRPLPLHCHDIAPR  
VLPVLHNAIKDHGKISITWFGPYPRVTLMEPELVKEVLSNKFHFAKIRATPLANFLVQGLVTYEGEKWAKHRRINPAF  
HLEKLLMLPAFSTSCGELIRRWEKMIPDEGSQELKCLSRAPRPHKRCHLQDCIRSSYEEGRRIPELLAEQIQLLIPAFQ  
TIYIPGYRFLPTPMNKRRSQVYNEMKRILKGMIEKREKAIRMGDSSKNDLLGLLDSNMKEGEEHGKSQNKGMSTEDVIE  
ECKLFYFAGQETTAVLLTWTMILLSMYPNWQAKAREEVLVQVFGKNTPDMEGLSHLKIVTMILYEVRLRYPFVLLRRKTY  
KAMELGGIYPPGVMLSLPLLFIHHDPAFWGEDAKEFNPERFSEGISKASKVPGAFFPFGGGPRICIGQSFAMIEAKIGI  
CMILQCFSELSPSYIHAPHTVITLQPQHGAQLMLQKL

>KAJ0985925.1(DzCYP72A2/9)

MESVMGVVWAAA VAVAWAWRTLDWVWWTPRRLDRELRRQGLRGNQYRVLHGDLENARLSEEAKSRPLPLHCHDIA  
PRVVPVLHNAIKDHGKISITWFGPYPRVTLMEPELVKEVLSNKFHFAKVRPNPLTKLLVQGLVVYEGEKWAKHRRINP  
AFHLEKLLMLPAFSTSCGELIRRWEKMIPDEGSHELNVFPELQDLTKDVISRTAFGSSYEEGRRIPELLAEQIQLLIPA  
FQTIYIPGYRFLPTPMNKRRSQVYNEMKRILKGMIEKREKAIRMGDSSKNDLLGLLDSNMKEGEEHGKSQNKGMSTEDV  
IEECKLFYFAGQETTAVLLTWTMILLSMYPNWQAKAREEVLVQVFGKSTPDMEGLNHLKIVTMILYEVRLRYPFVFLTRK  
TYKAMELGGITYPQGVILSLPLLFIHHDPAFWGEDAKEFNPERFSEGISKASKVPGAFFPFGGGPRICIGQSFAMIEAKI  
GICMILQRFSELSPSYIHAPHTVITLQPQHGAQLMLQKL

>KAJ0985926.1(DzCYP72A3)

MELVMGVVWAAA VAVAWAWRTLDWVWWTPRRLDRELRRQGLRGNQYRLLHGDLENARLSEAKSRPLPLHCHDIAPRVL  
PLFHNAIKDHGKISITWLGOPYPRVILAEPELVKEVLSNKFHGFVKPSTTPLAKFLVQGLASYDGEKWVVKHRRINPAFHF  
EKLKQMLPAFSTSCGELIRRWNKMIPDEGSQELNVFPELQGLTKDIISRTAFGSSYEEGRRIPELLTEQIKLTIPAFKTV  
YIPGYRFLPTPMNKRRSQVYNEMKRILKGMIEKREKAIRMGESSKNDLLGLLDSNMKEGEEHGKSQDKGMSTEDVIEEC  
KLFYIAGQETTSALLTWTMILLSMYPNWQANAREEVLVQVFGKSTPDIEGLSHLKIVTMILYEVRLRYPFVFLDRKTYKA  
MELGGITYPSGVILSLPLLFIHNDPTFWGEDAKEFNPERFSEGISKASKVPGAFFPFGGGPRICIGQNFALMEAKIGICM  
IIQHFSFVLSPSYIHAPHSVITLQPQHGAQLMLQKL

>KAJ0985927.1(DzCYP72A4)

MELVMGVVWAAA VMLVAVAWAWRTLDWVWRTPMRLDRELRRQGLRGNQYRVFHDLENARLSKEAESRPLPLHCHDIAPR  
VLPVLHNAIKDHGKISITWLGPCPRVTLTEPELVKEVLNKFHGFVKPSTTPFAKFLVQGLVYYEGEHWAKHRRILNPAFH  
LEKLLMLPAFSTSCSELIRRWEKMIPDEGSQELNVFPELQGLTKDVISRTAFSSSYEEGRRIPELLKEQIQLYIQVYKT  
VYIPGYRFLPTPMNKRRSQVYNEMKRILKGMIGEERKGHKNGESCKDDLLGLLDSNMKEGEEHGKSQNKGMSTEEVIEE  
CKLFYFAGQETTPSLLTWTMILLSMYPNWQTKAREEVLVQVFGKNTPDMEGLSHLKIVTMILYEVRLRYPFVFLTRKTY  
KAMELGGITYPPGVIFSLPLLFIHHDPTFWGEDAKEFNPERFSEGISKASKVPAAFFPFGGGPRICIGQNFALIEAKIGI  
CMILQHFSFVLSLLSYIHAPHTVITLQPEHGAQLMLQKL

>KAJ0985933.1(DzCYP72A5)

MESVMGVVWAAA VAVAWAWRTLDWVWWTPRRLDRELRRQGLRGNQYRVLHGDLENARLSEEAKSRPLPLHCHDIAPR  
VVPVLHNAIKDHGKISITWFGPYPRVTLMEPELVKEVLSNKFHFAKVRPNPLTKLLVQGLVVYEGEKWAKHRRINPAF  
HLEKLLMLPAFSTSCGELIRRWEKMIPDEGSHELNVFPELQDLTKMSSPGLHSAAMKKEGRRIPELLAEQIQLLIPAF  
QTLYIPGYRFLPTPMNKRRSQVYNEMKRILKGMIEKREKAIRMGEGSKNDLLGLLDSNIKESEEHGKSQNKVMSTEDVI  
EECKLFYFAGQETTSLLTWTMILLSMYPNWQAKAREEVLVQVFGKNTPDMEGLSHLKIVTMILYEVRLRYPFVLLRRKT  
YKAMELGGITYPPGVILSLPLLFIHHDPAFWGEDAKEFNPERFSEGISKASKVPGAFFPFGGGPRICIGQSFAMIEAKIG  
ICMILQCFSELSPSYIHAPHTVITLQPQHGAQLMLQKL

>KAJ0985934.1(DzCYP72A6)

MELVMGVVWAAA VAVAWAWRTLDWVWWTPRRLDRELRRQGLRGNQYRVLHGDLENARLSEEAKSRPLPLHYHDIAPRVL  
PLFHNAIKDHEPELVKEVLSNKFHGFVKPSTTPLAKFLVQGLASYDGEKWVVKHRRINPAFHFEKLLKQMLPAFSTSCGEL



IRRWNKMIPDEGSQELNVFPELQGLTKDIISRTAFGSSYEEGRRIFELLTEQIKLTIPAFKTVYIPGYRFLPTPMNKRRS  
QVYNEMKRILKGMIEKREKAIRMGESSKNDLLGLLDSNMQEGEEHVKSQDKGMSTEDVIEECKLFYIAGQETTSALLTW  
TMILLSMYPNWQANAREEVLVQVFGKSTPDIEGLSHLKIVTMILYEVLRLYPPGVFLDSKTSKAMELGGITYPGVSILSLP  
LLFIHNDPTFWGEDAKEFNPERFSEGISKASKVTGAFFPFGGGPRICIGQNFALMEAKIGICMIIQHFSFVLSPSYIHAP  
HSVITLQPQHGAQLMLQKL

>KAJ0985935.1(DzCYP72A7)

MRLDRELRRQGLRGNQYRVFHDGLKENARLSKEAESRPLPLHCHDIAPRVLPFHNAIKDHGKISITWLGPCPRVTLTEP  
ELVKEVLNKFHGFVKPSTTPFAKFLVQGLVSYEGEKWAKHRRILNPAFHLEKLNLMPLAFSTSCSELIRRWEKMIPDEGS  
QELNVFPELQGLTKDVISRTAFSSSYEEGRRIFELLKEQIQLYIQVYKTVYIPGYRFLPTPMNKRRSQVYNEMKRILKGM  
IEKREKAIRMGESCKDDLLGLLDSNMKEGEEHGKSQNKGMSTEEVIEECKLFYFAGQETTSLLLTWTMILLSMYPNWQT  
KAREEVLVFGKNTPDMEGLSHLKIVTMILYEVLRLYPPVVFITRKYKAMELGGITYPGVSILPLLLFIHNDPTFWGE  
DAKEFNPERFSEGISKASKVPAAFFPFGGGPRICIGQNFALIEAKIGICMILQHFSFVLSLSYIHAPHTVITLQPEHGAQ  
LMLQKL

>KAJ0985941.1(DzCYP72A8)

MESVMGVVWAAA AVAVVAWAWRTLDWVWWKPRRLDRELRRQGLRGNQYRLLHGDLENARLSEEAKSRPLPLHCHDIAPR  
VLPVLHNAIKDHGKISITWFGPYPRVTLMEPELVKEVLSNKFHFAKIRATPLANFLVQGLVTYEGEKWAKHRRINPAF  
HLEKLKLMPLAFSTSCGELIRRWEKMIPDEGSQELNVFPELQDLTKDVISRTAFGSSYEEGRRIFELLAEQIQLLIPAFQ  
TIYIPGYRFLPTPMNKRRSQVYNEMKRILKGMIEKREKAIRMGESSKNDLLGLLDSNIKESEEHGKSQNKVMSTEDVIE  
ECKLFYFAGQETTSLLLTWTMILLSMYPNWQGKAREEVLVQVFGKSTPDMEGLNHLKIVTMILYEVLRLYPPVFLTRKTY  
KAMELGGITYPQGVSILSLPLLLFIHNDPAFWGEDAKEFNPERFSEGISKASKVPGAFFPFGGGPRICIGQSFAMIEAKIGI  
CMMLQRFSFELSPSYIHAPHTVITLQPQHGAQLMLQKL

>KAJ0985942.1(DzCYP72A2/9)

MESVMGVVWAAA AVAVVAWAWRTLDWVWWTPRRLDRELRRQGLRGNQYRVLHGDLENARLSEEAKSRPLPLHCHDIA  
PRVVPVLHNAIKDHGKISITWFGPYPRVTLMEPELVKEVLSNKFHFAKVRPNPLTKLLVQGLVVYEGEKWAKHRRINP  
AFHLEKLKLMPLAFSTSCGELIRRWEKMIPDEGSHELNVFPELQDLTKDVISRTAFGSSYEEGRRIFELLAEQIQLLIPA  
FQTIYIPGYRFLPTPMNKRRSQVYNEMKRILKGMIEKREKAIRMGDSSKNDLLGLLDSNMKEGEEHGKSQNKGMSTEDV  
IEECKLFYFAGQETTAVLLTWMTMILLSMYPNWQGKAREEVLVQVFGKSTPDMEGLNHLKIVTMILYEVLRLYPPVFLTRK  
TYKAMELGGITYPQGVSILSLPLLLFIHNDPAFWGEDAKEFNPERFSEGISKASKVPGAFFPFGGGPRICIGQSFAMIEAKI  
GICMILQRFSFEL

>KAJ0985943.1(DzCYP72A10)

MELVMRVVWAAA AVAVVAWAWRTLDWVWWTPRRLDRELRRQGLRGNQYRVLHGDLENQAQLSEEAKSRPLPLHYHDIAPR  
VLPLFHNAIKDHGKISITWLGYPYPRVILTEPELVKEVLSNKFHGFVKPSTTPLAKFLVQGLASYDGEKWWKHRRINPAF  
HFEKLKQMLPAFSTSCGELIRRWNKMIPDEGSQELNVFPELQGLTKDIISRTAFGSSYEEGRRIFELLTEQIKLTIPAFK  
TVYIPGYQFLPTPMNKRRSQVYNEMKRILKGMIEKREKAIRMGESSKNDLLGLLDSNMQEGEEHGKSQDKGMSTEDVIE  
ECKLFYIAGQETTSALLTWMTMILLSMYPNWQANAREEVLVQVFGKSTPDIEGLSHLKIVTMILYEVLRLYPPGVFLDRKTY  
KAMELGGITYPGVSILSLPLLLFIHNDPTFWGEDAKEFNPERFSEGISKASKVPGSFLPYGVGPRICIGQNFALMEAKIGI  
CMIIQHFSFVLSPSYIHAPHSVITLQPQHGAQLMLQKL

>KAJ0985944.1(DzCYP72A11)

MELVMGVVWAAA VMLVAWAWRTLDWVWRTPMRLDRELRRQGLRGNQYRVFHDGLKENARLSKEAESRPLPLHCHDIAPR  
VLPLFHNAIKDHGKISITWLGYPYPRVTLTEPELVIEVLNKFHGFVKPSTTPFAKFLVQGLVSYEGEKWAKHRRILNPAFH  
LEKLKLMPLAFSTSCSELIRRWEEKIPDEGSQELNVFPELQGLTKDVISRTAFSSSYEEGRRIFELLKEQIQLYIQVYKT  
VYIPGYRFLPTPMNKRRSQVYNEMKRILKGMIEKREKAIRMGESCKDDLLGLLDSNMKEGEEHGKTQNKGMSTEEVIEE  
CKLFYFAGQETTSLLLTWTMILLSMYPNWQAKAREEVLVQVFGKNTPDMEGLSHLKIVTMILYEVLRLYPPVFLTRKTYK  
AMELGGITYPGVSILPLLLFIHNDPTFWGEDAKEFNPERFSEGISKASKVSAFFPFGGGPRICIGQNFALIQAKIGIC

MILQHFSFVLSLSYIHAPHTVITLQPQHGAQLMLQKL

>KAJ0985945.1(DzCYP72A12)

MESLMGVIWAVAAVVVVAAAWRTLWDWIWWTPRRLDRELRRQGLRGNQYRVLHGDLENVRLSKEAKSRPLPLHCHDIAPR  
VLPLFHNAIKDHGKISITWLGYPYPRVTLTEPELVKEVLSNKGHFVKPTTTPLAKFLVQGLVSYEGEKWAKHRRINPAF  
HLEKLKMLPAFSTSSGELIRRWEKMIPNEGSQELNVFPELQDLTKDVISRTAFGSSYEDGRRIFELLTEQIQLLIPAFQ  
TVYIPGFRFLPTPMNKRSSQVYNEMKRILIGMIEKREKAIRMGESNKNDDLGLLLDSNMKEGEEHRKSQNKGMSTEDVIE  
ECKLFYFAGQETTSVLLTWTMILLSMYPNWQAKAREEVQLQVFGKSAPDMEGLSHLKIVTMILYEVRLRYPYPAVFLTRKTY  
KAMELGGITYPGVLISPLLLFIHHDVPFWGEDAKEFNPERFSEGISKASKVPGAFFPFGGGPRICIGQNFALIEAKIGI  
CMILQHFSFVLSPSYIHAPHNVITLQPQHGAQLMLQKL

>KAJ0985946.1(DzCYP72A13)

MELVMGVIWTVTAAVVVVWAWRTLWDVWWTPRRLDRDLRRQGLRGNQYRLLHGDLENARLSKEATSRLPLHCHDIAPR  
VAPLIHNAIKDHGKISITWLGYPYPRVSLMDPDLVKEVLSNKGHFVKPRITPIAKFLVQGLVAYEGEKWAKHRRINPAF  
HLEKLKMLPAFSTSSGELIRRWEKMIPDEGSQELNVSPFIQNLTGDISRTAFGSSYEEGRRIFELLTEQIHLTPALQ  
TVYIPGYRFLPTPMNNRRSQVYNEMKRILKGMIEKREKAIRMGESSKNDDLGLLLDSNMKEGEEQEKSQNKVMSTEDVIE  
ECKLFYFAGQETTSVLLTWTMILLSMYPNWQAKAREEVQLQVFGKSTPMDGSLRKIVTMILYEVRLRYPYPTFLTRKTY  
KAMELGGINYPGVLLQLPLLFIHHDPEFWGEDAKEFNPERFSEGILKASKVPGAFFPFGGGPRICIGQSALIEAKIGI  
SMILQHFSFVLSPSYIHAPHTALTLPQHGAQLMLQKL

>KAJ0985950.1(DzCYP72A14)

MEYSVAAGVKEMIWGVATALLVVVWVRTLEWLWWKPRRLERELKRQGLRGKRYRLFHGDLYNARLMKDALSRLPPYSH  
DVAPRVIPLVHQAIAKHGKMSITWLGYPYPRVSLMDPELIREVLSNKGHFVKPNFSPLVKLLAQGLASHEGEKWAKHRR  
INPAHFHEKLCMLPAFSTCCDELVKRWQNKMNVEGSIELNMWPELQNLTDGDISRTAFGSCYEEGRRIFQLQTEQAELI  
IPTAQTVYVPGFRFLPTPKNNRRKAIDREIKTILRSMIEKREKAIRMGGETSCKDDLGLLLESNMKETEQQGRSKNKGL  
TTEDVIEECKLFYLAGQETTSLLTWTMVLLSMYPNWQAKAREEVQLQVFGKNKPDMDGVGRLKIVTMILYEVRLRYPYPAI  
SLTRRTYKTMELGGITYPPGVLLLLPIILVHHDLDWFGEDEKEFKPDRFAEGISKASKVPGAFFPFGGGPRICIGQSAL  
IEAKLGLSMILQNFSFELSPSYIHAPYTLVTLQPQHGAQIKLHKL

>KAJ0987931.1

MGEGLVGWLMGLAVVVVVVGLSLVMAMKVVDLLWWRPRRLEEHSKQGIKGPYPYRFFLGNVKEMVGMLEASSKPMMPQ  
NSHNILPRVLSFYHHWKKIYGSTFLLWFGPTPRLTVADPDILRDLVSRSDSFDRYESHPLVRQLEGDGLVSLRGEKWAH  
HRKVLTPTFHMDNLKLLIPYIGKTVLEMSDKLILAIPPSADEVIDVSEWFQVVTEDAITRTAFGQSYDDGRAVCQLQAQ  
QMLFAAEAFRKLPIPGYRFLPTKKNASSWRLDKEIKKNLVGLIKRRKDSSDDEERPDGRPKDLLGQMINATTTAMSVHD  
IVEECKTFFFAGKQTTSNLLTWTTVLLAMHPEWQDLARHEVLRVCGSRDIPTRDHLAQLKTLRMILNETLRYPYPAVATI  
RRAKADVELGGYKIPRGTEILIPIMAVHHDAKIWGADAAEFNPGRFSNRAQNPTGFIPFGLGARMCIGKNLALLEAKLTI  
AILLQRFSLAPRYVHAPTVMMLYPQYGAPVIFRPLSPSIQSDDGPSESFL

>castasterone\_C26-hydroxylase

MEGFCFQWLCVILFLYVLLLCIQKAFVHLWWTPKIIQKHFKKQGIGTPKYHFLFGNLKEIASFTTPSWPS  
TFTSHDILPNVLPFYHHWKKIYGSIWVFGPTARVTISDPALIRDIFVLKSDNFEKNESPALVKLEGD  
GLLSLKGEKWAHHRKIITPTFYIENLRMLIPMMGKSMKEMLDKWSKMSNASGKVEIEVSEMFSTLAEDVI  
TRIVFGNSYEDGKAIFELQAQQMIYATEAYQKVFIPIGYRFLPSKKNRICWRLDKQVRKSLMKLIEERRKK  
EEVLSEECNDLLEVMIKAGSDDEYRNTITVNDIVEECKTIFFAGKHTTSNLLTWTITLLAMHPKWQELA  
RDEVLTVCGARDPPSKQQISKLTLGMIINESVRLYPYPAVAAIRRAKVDTQLGDFTLPRGTELLIPIAI  
HHDQTLWGQDANEFNPARFGLGVAQAAKHPMAFMPFGLGARRCVGNLAVLQAKLAIAMILQRFSDLSF  
NYRHAPTILMLLCPQYGAPIHFQKL

>GhCYP734A1

MDGVLQWLKLVAVSF MVLVVLK VIVLLWWRPKRIEDHFSRQGIRGPPYHFFIGNVKELVGMMLKASSQP  
MPFSHNILPRVLSFYHHWKKIYGATFLVWFGPTVRLTVADPDLIREIFTSKSEFYEKNEAHLIRQLEGD  
GLLSLKGEKWAHHRKIITPTFH MENLKLLVPLVAQRVTHMLDKWSAMSTNTGEIEIEVCEWFQTLTEDVI  
TRTAFGTSYEDGKAIFRLQAQQMVLAEEAFQKVFI PGYRFLPTKRNI RLWKLDRDVKKSMLKIDGRKNK  
LGNTVQEKGP KDLLGLMMQASNSSPNVTVDHIIIECKSFFAGKQTTSNLLTWTTVLLAMHPHWQVLARE  
EVLKVCGRDIPSKDDVVKLKTLTMILNESLRLYPPTIATIRRAKIDAELGGYMILRDTELLIPILAVHH  
DQAIWGNDANEFNPARFSEGVARA AKHPVGFI PFGLGVRTCIGQNLAILQAKLTL SII LQRFSFRLAPTY  
QHAPT VLM LLYPQYGAPIIFQPLPESTVPRDQGS

>CYP734A1\_11

MFSAMEEVWYWFKLLVICFMA LVFVLKV VVLLWWRPKIEHHFSKQGIRGPPYRFFIGNV  
KELVGLMLKASSQPM PF SHNILPRVLSFYHHWKKIYGISSSFLSSSLPLSFQFRFTFFT  
TAVSSVCATFLVWFGPTVRLTISDPDLIREIFASKSEFYEKNEAHLV KQLEGDGLLSLK  
GEKWAHHRKIITPTLHMENLKLMVPVMAKSVTEMLEKWMAMSKSGEVEIEVSEWYQTLTE  
DVITRM AFGSSYEDGKAIFQLQAQQMVMAAEAFQKVFI PGYRFLPTKRNMNSWKLDKEIK  
KSLVKLIDRRKENRWKENPEKCPKDLLGLMIEETVKKGEMSWCPSSKITVQDIVEECKSF  
FFAGKQTTSNLLTWTTVLLAMHPQWQVRARDEVFRVCGARDTPTKDDVVKLKTL SMILNE  
SLRLYPPIIAAIRRAKTDV ELGGYKIPRGMELLIPI LAVHHDPLIWGNDANEFNPARFAE  
GVARAAKHPVAFIPFGLGVRTCIGQNLAILQAKLALAILQRFSFTLAPSYQHAPT VLM L  
LYPQYGAPITFRTLSTPDQGS

>AtCYP734A1

MEEESSWFIPKVLVLSVILSVIVKGMSLLWWRPKIEEHFSKQGIRGPPYHFFIGNVK  
ELVGMMLKASSHPMPFSHNILPRVLSFYHHWRKIYGATFLVWFGPTFRLTVADPDLIREI  
FSKSEFYEKNEAHLV KQLEGDGLLSLKGEKWAHHRKIISPTFH MENLKLLVPVVLKSVT  
DMVDK WSDKLS ENGEVEVDVYEW FQILT EDVISRTAFGSSYEDGRAVRLQAQQMLLCAE  
AFQKVFI PGYRFPTRGNL KSWKLDKEIRKSLLKLIERRRQNAIDGEGEECKEPAKDLL  
GLMIQAKNVTVQDIVEECKSFFAGKQTTSNLLTWTTILSMHPEWQAKARDEVLRVCGS  
RDVPTKDHVVKLKTL SMILNESLRLYPPIVATIRRAKSDVKLGGYKIPCGETELLIPIIAV  
HHDQAIWGNDVNEFNPARFADGV PRAAKHPVGFI PFGLGVRTCIGQNLAILQAKLTLAVM  
IQRFTFHLAPTYQHAPT VLM LLYPQH GAPITFRRLTNHED

>DzCYP94D143

MELTSLILVSSII LISTFLLLQRRRTTRKQTIDGAPTLTFKDLVKNGHRFLDWTTE  
MLLSSPTNTITLPSTVATSNPSNIEHILKYNF SNYPKGHNITDTLHDL LGDGIFNTDG  
DHWKLQRKIASLQFN TKSIRSFVTNAVQIEVTTRLLPLAAAAVSGEPIDLQDTLER  
FSFDNVCKVAFDVPARLAGDAMDGGRFARAFDTAAEISTNRFRQPRFFWLLRRK  
LNLGEERRLKEAVRTVNEFAMKV VHDK KLGKAGDDDL SKFIEDDSEHSDEFLR  
DIIISFVLAGRDTTSSALTWFFWLVS SRPEIRRAIRDEVSAVRAKHGSEPGQELKLEE  
LREMEYLHAALSETRLYPVSLEPRACLADDKLPDGTEVKEGWSVMYNSYAMG  
RMKSIWGEDCMEFRPERWLVNGEFQAKSPFKFPIFHAGPRTCLGKEMAYIQMKA  
VAASVLERFELEMAPGEEKERAHGFTIVLRMNGGLPIVVKNRD

>PpCYP94D108

MDPPSLLSLALLLLAAAAAAAFVLFPRRRSPEKKPSSGNPGSLS  
ELIKNGHRILDWMVEILAASPTNTVATYMGVVTANPANVEHMLKTKFENYPKGDRFVT  
LLEDFLGRGIFNSDGDHWKLQRKTASLEFN TKIRT FVMENVRVSVVDRLIPIFARAA

ASGETIDLQETLERFAFDNVCKVSFNEDTGRLSGDDTMEGREFARAFEQASELIVGRY  
KHPFLLSWKLMRFFNIGDERRLKEKIATVHRFATSVIRRRKSAASLGDDLLSRFIAEA  
DYPDEFRLDIIISFVLAGRDTSATLTWFFWLASTRPEVLARVEAEVNAVRRKNGTCA  
GVMFTLEEVREMDFLHAALSEALRLYPVPLQTRACHESDEFDPGTVKVRPGTTVMYNS  
YAMGRMKSIWGEDYAEFRPERWLDKGGGFQPRSPFRFPVFHAGPRMCLGKEMAYIQMK  
AAASVVERFEVVMDKEKVREKDYTMILRVKGGLPVRLKEKSVAAG

>PpCYP94D109

MESLSLIFISFITLIVFLVVSASKKRSHPSGYEPDIPKGGCPML  
DSTAYLVLSSTNTAVTSTGIITSNPENIEHVLKTNFANYPKGEHLTYGLYDLLGRGI  
FNSDGDHWWKLQRKIASLEFNTRTIRHFVTHDVSREVLDRLLPSLSRAANSGEIDLQE  
VLDRLAFDINVCKIAFDDDDPARLADKKFNDGENDYYGKFAKAFGEAAEISTQRFKSRW  
KIARALNLGTERKMKNALAIVNEFAMQVVREMKRKRAEEGKGRGSSADLLSLFISEGE  
FSDEFRLDVVISFVLAGRDTSSTMAFFFWQVSTRPSICQKIKEIVSVRKNHNNSQG  
GAFTLEELREMDYLHAVLSETLRLYPIVPLHARYTLADDVLPDGMTVKKGSTVMHSIY  
AMGRMESIWGADCLEFRPERWLENGVFRPKSPFLFPVFLAGPRMCLGKETAYMQMKAV  
AASVMEKFKEIADGKHESEREYYLEIVLRLKGGLPVRVTEKEWSDNSAVNV

>PpCYP72A616

MDSRVLGALAALLAAAAWVMRAAAEWLWWPRRLERSLSRQGV  
DGNLYRFLNGDLKETVRLTKEARAQPISPPSHRFLHRINPLLLRAISHHGKFALTWIG  
PTPRVSIMDPVELVREVLSENKFGHFAKPKAAPIVKLLATGLANYEGEKWVRHRRINPA  
FHLEKLKRMLPAFFSCSELIGRWESLVGCDESREVDVWPELQNLTDGDISRTAFGSS  
YAEGRRIQQLQSEQAELLIQAVQTVYIPGYRFLPTPKNIRRTKIDKEVRALLRSIIEK  
RENAMKMGDVHDDLGLLMEYNLKESEHFNSKNIGMTTEDVIEECKLFYFAGQETTSV  
LLTWTMILLGMHPSWQDRAREEVSQVFGKNKPDFDGLSRLKTVTMILYEVLRLYPPII  
FLTRRTYKPMMLGGITFPPEVQLALPIIFIHHDPEFWGEDAEFNPDRFADGVSKASK  
NQMAFFPFGWGPICIGQGFAMLEAKMGLSMILQRFSFELSPNYSHAPHTKITLQPQH  
GAQMV LHRL

>TfCYP72A613

MVFLFPTGTIIHWLTIILAVIPWYLLNKFWLKPFRFEKLLKAQ  
GLQGDYPKLSALFMNNSKQDYILKLQQAESKISGLSKQAAPSIFSSHQTVHKGKGN  
SFLWEGTTPSVIITDPDQIKEVFDRIYDFPKQKLRSIAKYFSFGIIEYEGEKWAKHRK  
IVNPAFHLDKLKGMLPAFHSNEMISKWKGLLSADGTCEVDVWPFQNLTCDISRT  
AFGSSYAEGEKIFQLLKKQAFLLVTTLDKNIPLSLWWLETTTKRMEIERDIRESL  
EGHIEKREKALNGETTNDLLGILLQSNHAENQGHGNSKSIGMTTQEMIDECKLFYL  
VGQETTSTLLVWTMVLGGRYPEWQARARQEVQVFGNQNFEGLSQLKIVTMILYEV  
LRLYPPAIYFNALQKDLKGNLSLPAGTLVSLPIILIHQDNDIWGDDAKEFKPERFA  
EGIAKATKGQVSYPFGWGPICIGQNFALLEAKIAITSLLQNFSELSPNYVHVPTT  
VPFFQPKYGASIIHLKL

>TfCYP82J17

MDSFLSQPITIVLAISVLLYNIWKIRKPSNKFQKGMKLPQLSF  
ALPLIGHLHLLGNQIPLAKTFASFADKYGPIFQIRLGAYPTLVISNKEAIECFTTND  
KILASRTKSTHGILLGYNHASFACAPYGRFWAKIRKVTMLELLSSRRVESLRHVESE  
IDTLVKDLSLYVKVGKVEVWISEWMERLTFNIITKMICGKRYFEYLDQVDDVEANGNI  
VKLIKEVMHISGELVPKDVIPILGWFGFEGEVLKSMKRVSRDLDEVVGKWVEEHIEKS

DDGVNNSNEKQDLIDVMLSVIEDDPDSGNDRDTIHKANIVNLMIAGSDDTTSTMTWIL  
VLLNNMNALKRAQEEIDQHIGRDRKIESSDIKNLVYLQAIVKETLRLHPTLPLSIPH  
EATEDCNIQGYYPKGTRLFTNVWKLHRDPSIWLEPEKFSPERFINENGEIDHESHQF  
EYLPFGLGRACPGSMFATQVIHIAVARLIHLFDVEVPINEVVDMKQGTGLILSKFTP  
LKVLLTPRLPYELYQ

>VcCYP94N1v1

MDLPSASA AVAAATAAVIFLLTIYLLPKKKSPASTGKNGSTSLESYPVIGNLPHFVKNNRFLDWVAEII  
SQSPTGTVIADPLVFTSNPENVEHTAKSRFDAYARGPAATAVLHDFLGSGILNVDGDSWRAQRKTASSEF  
TTRSLRAFILDAVDGEAAGRLLPLLSRAAASGEVFDLQDVLERFAFDNICSIIFDADPNCLNDTHDGVGE  
RFYHAFHDATLLSTGRYYYPFHWVWRLLRWLNLGTEKRLRDAVSDVHKAIDELVGSRKTEVGTTVRRQGG  
GSDLLSRFAEGGDYSDDVLRDVLINFLVLAGRDTPSALTWFFFMISSRPDVVDQILDEIRSIRDHQDRSN  
PNGGGGGFTLEELREMNYLHAAITESRLNPPVPLMPKCMEDDVLDPGTVVRRGWTVMYSAFAMGRKAE  
IWGEDCMEFKPERCLDDGGCFKSASAYRLPAFHAGPRICLGKDMAYIQMKAVASSMLERFEVEVVEKRGK  
PELSITMRMDRGLPVRIKERKRGK

>VcCYP94N1v2

MDLPSASA AVAAATAAVIFLLTIYLLPKKKSPASTGKNGSTSLESYPVIGNLPHFVKNNRFLDWVAEII  
SQSPTGTVIAAPLVFTSNPENVEHTAKSRFDAYARGPAATAVLHDFLGSGILNVDGDSWRAQRKTASSEF  
TTRSLRAFILDAVDGEAAGRLLPLLSRAAASGEVFDLQDVLERFAFDNICSIIFDADPNCLNDTHDGVGE  
RFYHAFHDATLLSTGRYYYPFHWVWRLLRWLNLGTEKRLRDAVSDVHKAIDELVGSRKTEVGTTVRRQGG  
GSDLLSRFAEGGDYSDDVLRDVLINFLVLAGRDTPSALTWFFFMISSRPDVVDQILDEIRSIRDHQDRSN  
PNGGGGGFTLEELREMNYLHAAITESRLNPPVPLMPKCMEDDVLDPGTVVRRGWTVMYSAFAMGRKAE  
IWGEDCMEFKPERWLDDGGCFKSASAYRLPAFHAGPRICLGKDMAYIQMKAVASSLLERFEVEVVEKRGK  
PELSITMRMDRGLPVRVKERKRGK
